# Supplementary material for: Patient-specific MDS-RS iPSCs define the mis-spliced transcript repertoire and chromatin landscape of SF3B1-mutant HSPCs
Source: PubMed Central journal article supplement — Blood Adv. 2022 May 16;6(10):2992–3005. doi: 10.1182/bloodadvances.2021006325 (PMC9131920; doi:10.1182/bloodadvances.2021006325), 2022-05-16
Supplement: advancesADV2021006325-suppl1.pdf [file advancesADV2021006325-suppl1.pdf]

**Patient-specific MDS-RS iPSCs define the mis-spliced transcript repertoire and chromatin landscape of *SF3B1*-mutant HSPCs**

**Georgios Asimomitis<sup>§</sup>, André G. Deslauriers<sup>§</sup>, Andriana G. Kotini, Elsa Bernard, Davide Esposito, Malgorzata Olszewska, Nikolaos Spyrou, Juan Arango Ossa, Teresa Mortera Blanco, Richard Koche, Yasuhito Nannya, Luca Malcovati, Seishi Ogawa, Mario Cazzola, Stuart A. Aaronson, Eva Hellström-Lindberg, Elli Papaemmanuil\*, Eirini P. Papapetrou\***

<sup>§</sup>These authors contributed equally

\*Correspondence:

Eirini P Papapetrou, MD, PhD

[eirini.papapetrou@mssm.edu](mailto:eirini.papapetrou@mssm.edu)

Elli Papaemmanuil, PhD

[papaemme@mskcc.org](mailto:papaemme@mskcc.org)

Supplemental Methods

Supplemental Figures

Supplemental Tables

Supplemental References

## Supplemental Methods

### Methylcellulose assays

For methylcellulose assays, 5,000 iPSC-HSPCs at day 14 of hematopoietic differentiation were plated in duplicate 35-mm dishes in MethoCult GF+ (H4435, Stem cell technologies). Colonies were scored after 14 days and averaged between the duplicate dishes.

### Competitive growth assays

N-2.12-GFP, a clonal line previously generated from the N-2.12 line after transduction with a lentiviral vector expressing eGFP<sup>1</sup>, was mixed with each test iPSC line 1:1 and hematopoietic differentiation was initiated. Cells were harvested the next day (day 2) and on days 4, 8 and 12 of hematopoietic differentiation and the fraction of GFP<sup>-</sup> cells was measured by flow cytometry. The relative population size of GFP<sup>-</sup> cells at each time point was calculated relative to the fraction of GFP<sup>-</sup> cells on day 2.

### Flow cytometry

The following antibodies were used: CD34-PE (clone 563, BD Pharmingen), CD45-APC (clone HI30, BD Pharmingen). Cell viability was assessed with DAPI (Life Technologies). Cells were assayed on a BD Fortessa and data were analyzed with FlowJo software (Tree Star).

### Magnetic-activated cell sorting

3 *SF3B1*<sup>K700E</sup> and 3 *SF3B1*<sup>WT</sup> iPSC lines from patient 21 (N-21.1, N-21.6, N-21.14, MDS-21.16, MDS-21.29, MDS-21.31), patient 22 (N-22.22, N-22.27, N-22.45, MDS-22.1, MDS-22.43, MDS-22.44) and patient 23 (N-23.5, N-23.13, N-23.28, MDS-23.6, MDS-23.24, MDS-23.38) were subjected to hematopoietic differentiation. Magnetic-activated cell sorting (MACS) with anti-CD45 MACS cell separation microbeads and reagents (Miltenyi Biotec) was performed on an empirically determined day of differentiation culture when nearly 100% of CD45<sup>+</sup> cells are also still CD34<sup>+</sup> (ranging from day 10 to 13, depending on the individual line and differentiation experiment). The sorted cells were utilized for RNA-sequencing and ATAC-sequencing.

### Targeted gene sequencing

Variant calling and annotation, filtering for artifacts and copy number identification was performed as previously described<sup>2,3</sup>.

## **GSEA analysis**

GSEA analysis was performed on the differentially expressed genes between *SF3B1*<sup>K700E</sup> and *SF3B1*<sup>WT</sup> iPSC-HSPCs using the R-package clusterProfiler<sup>4</sup>. Only gene sets with Benjamini-Hochberg (BH) adjusted p-value < 0.05 were considered.

## **Computation of statistical significance in differential transcript usage**

The statistical significance of the change in transcript usage between *SF3B1*<sup>K700E</sup> and *SF3B1*<sup>WT</sup> iPSC-HSPCs was assessed in a two stage process using the stageR R-package. The first stage (screening phase) identified the genes with evidence of differential transcript usage (DTU) and the second stage (confirmation phase) identified the transcripts within these genes that participate in the DTU.

## **ATAC sequencing**

50,000 MACS-sorted CD34+/CD45+ cells from each individual iPSC line were processed as follows: nuclei were isolated by lysis with 50 ul of ATAC lysis buffer (10 mM Tris pH 7.4, 10 mM NaCl, 3 mM MgCl<sub>2</sub>, 0.1% NP40, 0.1% Tween-20, and 0.01% Digitonin) and washed with 1 mL of ATAC wash buffer (10 mM Tris pH 7.4, 10 mM NaCl, 3 mM MgCl<sub>2</sub>, 0.1% Tween-20). Cell lysates were spun to obtain nuclear pellets, which were subjected to transposase reaction using the Illumina Nextera DNA Sample Preparation Kit according to the manufacturer's instructions.

## **Peak Calling**

ATAC-seq peaks for each replicate of the cohort were called using MACS2<sup>5</sup> with a low pass whole genome sequencing background sample and the following parameters (--min-length 100 -f BAMPE).

## **Assignment of ATAC-seq peaks to genes and differential accessibility of genes**

Each ATAC-seq peak was assigned to the gene with the closest Transcription Start Site (TSS) using HOMER<sup>6</sup> with the Ensembl GRCh37 gtf annotation file. To determine accessibility changes at the gene level, we considered the regulation of the surrounding peak regions as well as the proximity of each gene to a differentially accessible peak. Specifically, a gene was regarded as differentially accessible if: (1) There was at least 1 differentially accessible peak within 50 kb of its TSS; or (2) The distribution of accessibility log<sub>2</sub>fc of all peaks within 50 kb upstream and downstream of its TSS was significantly shifted (Benjamini-Hochberg [BH] adjusted p-value <

0.05), as compared to the ATAC-seq atlas background distribution by a Kolmogorov-Smirnov (KS) test.

### **Motif enrichment analysis**

Motif enrichment analysis was performed with HOMER using known motifs in the HOMER default database.

### **Correlation of chromatin accessibility to normal hematopoiesis**

To compare the accessibility profiles of our iPSC-HSPCs to normal primary hematopoietic populations, we obtained raw bulk ATAC-seq data of 67 samples (7 HSC, 6 MPP, 3 LMPP, 8 CMP, 7 GMP, 7 MEP, 6 Mono, 8 Ery, 5 CLP, 6 NK, 4 B cell) from a published dataset<sup>7</sup>. These were processed as described above for the iPSC-HSPC data. Pairwise Pearson correlation between iPSC-HSPCs and the normal hematopoietic populations was computed based on a set of differentially accessible peaks between the SF3B1<sup>K700E</sup> and SF3B1<sup>WT</sup> iPSC-HSPCs that overlapped with the ATAC-seq atlas of the Corces et al. samples.

### **Luciferase assay**

A lentiviral vector encoding a firefly luciferase TEAD reporter containing 10 copies of the GT-IIC motif (GTGGAATGT)<sup>8</sup> and a lentiviral vector expressing Renilla luciferase were packaged as described<sup>1</sup>. 300,000 iPSC-HSPCs were transduced on day 12 of hematopoietic differentiation with the two lentiviral vectors and 72 hours later, dual-luciferase reporter assay was performed according to the manufacturer's protocol (Promega, Madison WI, USA), using TD-20e Luminometer (Turner Biosystem, Promega, Madison WI, USA). The ratio of Firefly to Renilla luciferase was calculated.

### **Western blot**

Cells were harvested in EBC lysis buffer (50 mM Tris-HCl at pH 7.5, 150 mM NaCl, 5 mM EDTA, 0.5% NP-40), supplemented with Complete Mini Protease and Phosphatase Inhibitor Cocktails (Roche, Indianapolis, IN, USA). Cells were lysed and 30 µg protein was subjected to SDS-PAGE followed by transfer onto an Immobilon-FL PVDF membrane (Millipore, Billerica, MA, USA) followed by incubation with the indicated antibodies. Detection was carried out with an Odyssey Infrared Imaging System (LI-COR Biosciences, Lincoln, NE, USA) with IR dye-tagged secondary antibodies (LI-COR Biosciences). The following antibodies were utilized: YAP (sc-101199),

TEAD1 (sc-376113), GAPDH (sc-47724) (Santa Cruz, Dallas, TX, USA), p-YAP (13008), pan-TEAD (13295) (Cell Signaling, Danvers, MA, USA).

### **Statistical analysis**

Statistical analysis was performed with GraphPad Prism software. Pairwise comparisons between different groups were performed using a two-sided unpaired unequal variance t test.

### **Code availability**

Data preprocessing and analysis was conducted using R 3.5.2 and bash scripting. A github repository containing the code used in the analysis is available at the Papaemmanuil lab github page ([https://github.com/papaemmelab/MDS\\_SF3B1\\_iPSC](https://github.com/papaemmelab/MDS_SF3B1_iPSC)).

# Supplemental Figure 1

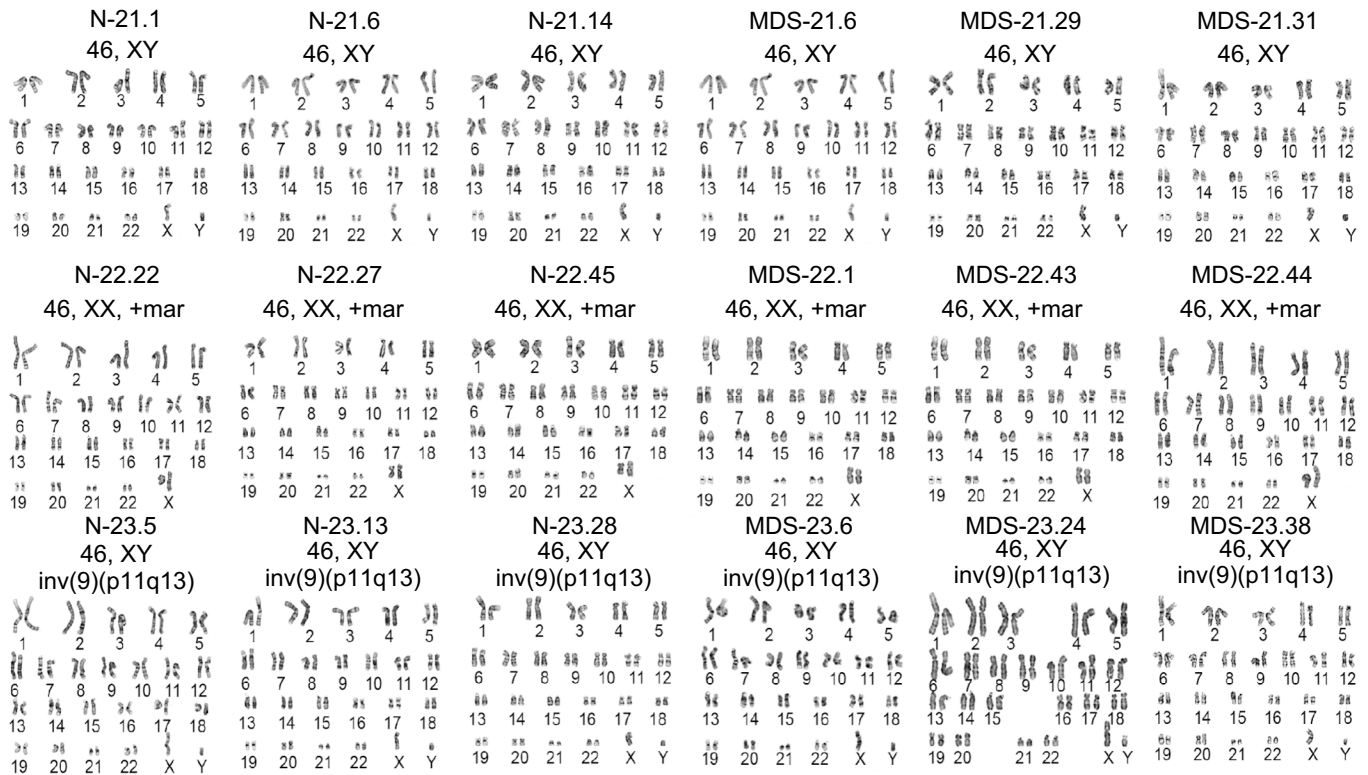

**Supplemental Figure 1. Karyotypes of all patient-derived iPSC lines used in this study.**

Karyotypes of all *SF3B1*<sup>K700E</sup> and *SF3B1*<sup>WT</sup> iPSC lines used in this study (see Supplemental Table 1 for details). All iPSC lines (*SF3B1*<sup>K700E</sup> and *SF3B1*<sup>WT</sup>) derived from patient 22, as well as the primary patient cells (Supplemental Table 1), harbored a marker chromosome. All the iPSC lines (*SF3B1*<sup>K700E</sup> and *SF3B1*<sup>WT</sup>) derived from patient 23, as well as this patient's primary cells (Supplemental Table 1), harbored a pericentric inversion of chromosome 9. Inv(9) occurs in 0.8-2% of the population and is considered a polymorphic chromosomal rearrangement<sup>9,10</sup>. It is not causally linked to MDS.

# Supplemental Figure 2

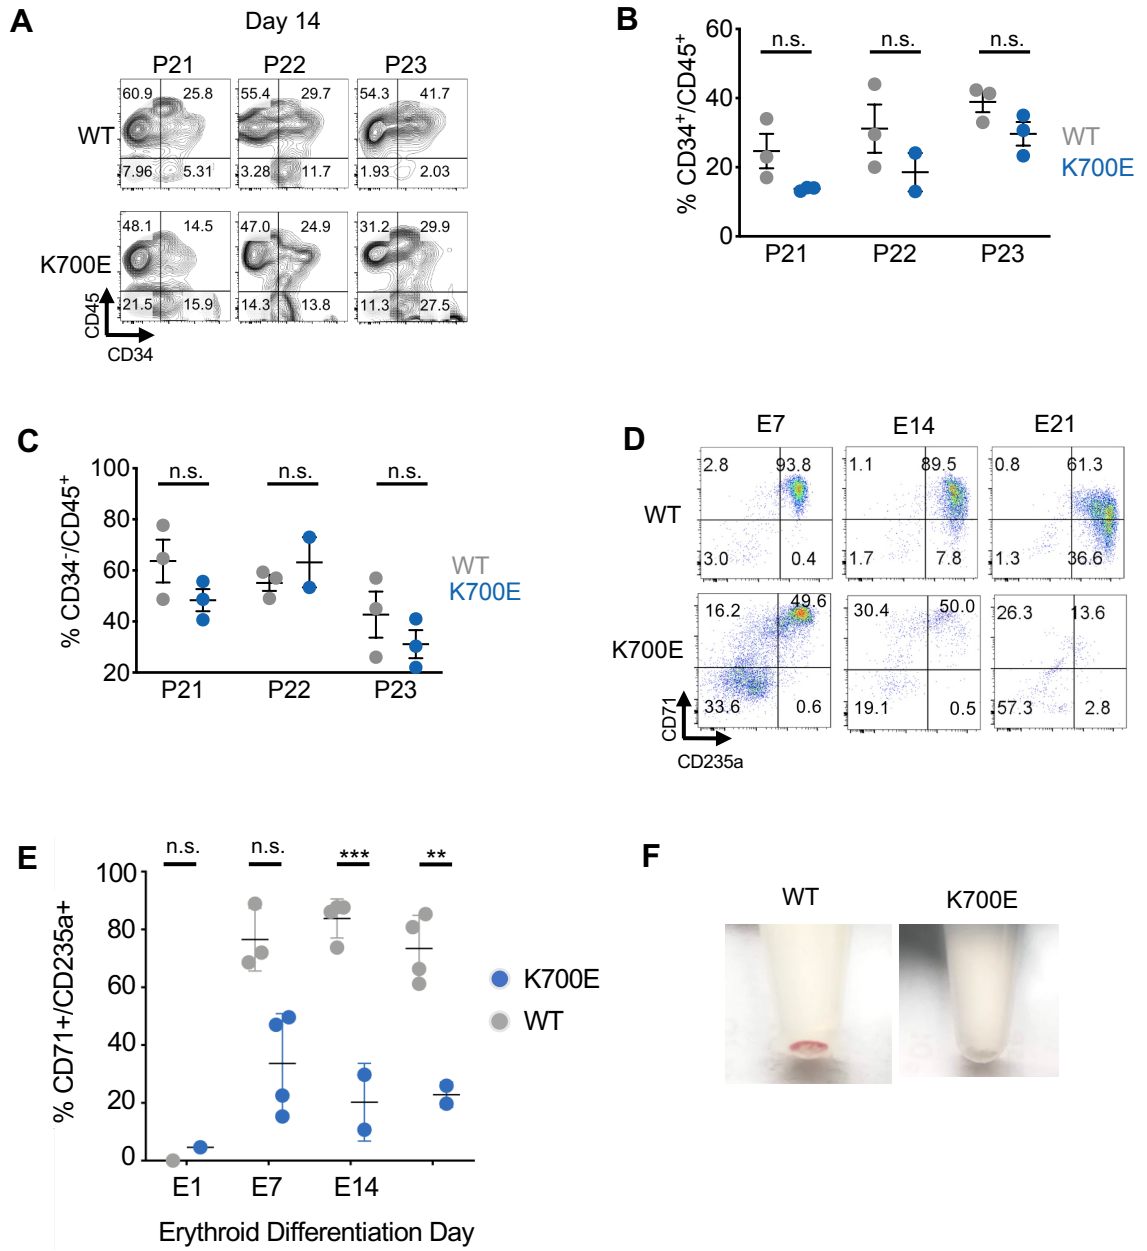



**Supplemental Figure 2. Hematopoietic differentiation of genetically matched *SF3B1*<sup>K700E</sup> and *SF3B1*<sup>WT</sup> iPSCs.**

**(A)** Representative flow cytometry plots on day 14 of hematopoietic differentiation of *SF3B1*<sup>WT</sup> (P21: N21.6, P22: N-22.22, P23: N-23.13) and *SF3B1*<sup>K700E</sup> (P21: MDS-21.29, P22: MDS-22.44, P23: MDS-23.24) iPSC lines.

**(B)** Fraction of CD34<sup>+</sup>/CD45<sup>+</sup> cells on day 14 of hematopoietic differentiation. Mean and SEM of 1-3 independent differentiation experiments with 2-3 iPSC lines from each group are shown. n.s.: not significant

**(C)** Fraction of CD34<sup>-</sup>/CD45<sup>+</sup> cells on day 14 of hematopoietic differentiation. Mean and SEM of 1-3 independent differentiation experiments with 2-3 iPSC lines from each group are shown. n.s.: not significant

**(D)** Representative flow cytometry plots on days 7, 14 and 21 of erythroid differentiation culture (E7, E14, E21) of a *SF3B1* WT and an *SF3B1*-mutant iPSC line.

**(E)** Fraction of CD71<sup>+</sup>/CD235a<sup>+</sup> cells on days 1, 7, 14 and 21 of erythroid differentiation culture (E1, E7, E14, E21). Mean and SEM of 2-3 independent differentiation experiments with iPSC lines N-21.14 and MDS-21.29 are shown. n.s.: not significant; \*\*: p<0.01; \*\*\*: p<0.005

**(F)** Representative cell pellets on day 14 of erythroid differentiation culture showing lack of hemoglobinization of the mutant cells.

# Supplemental Figure 3

**A**

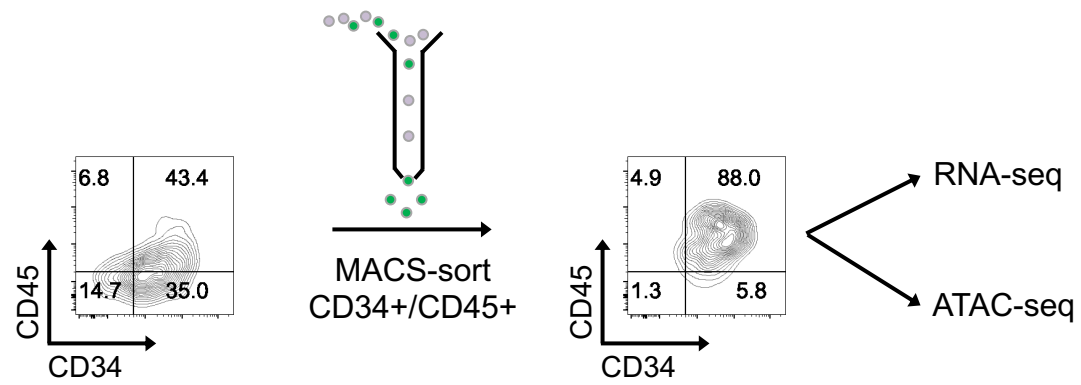

**B**

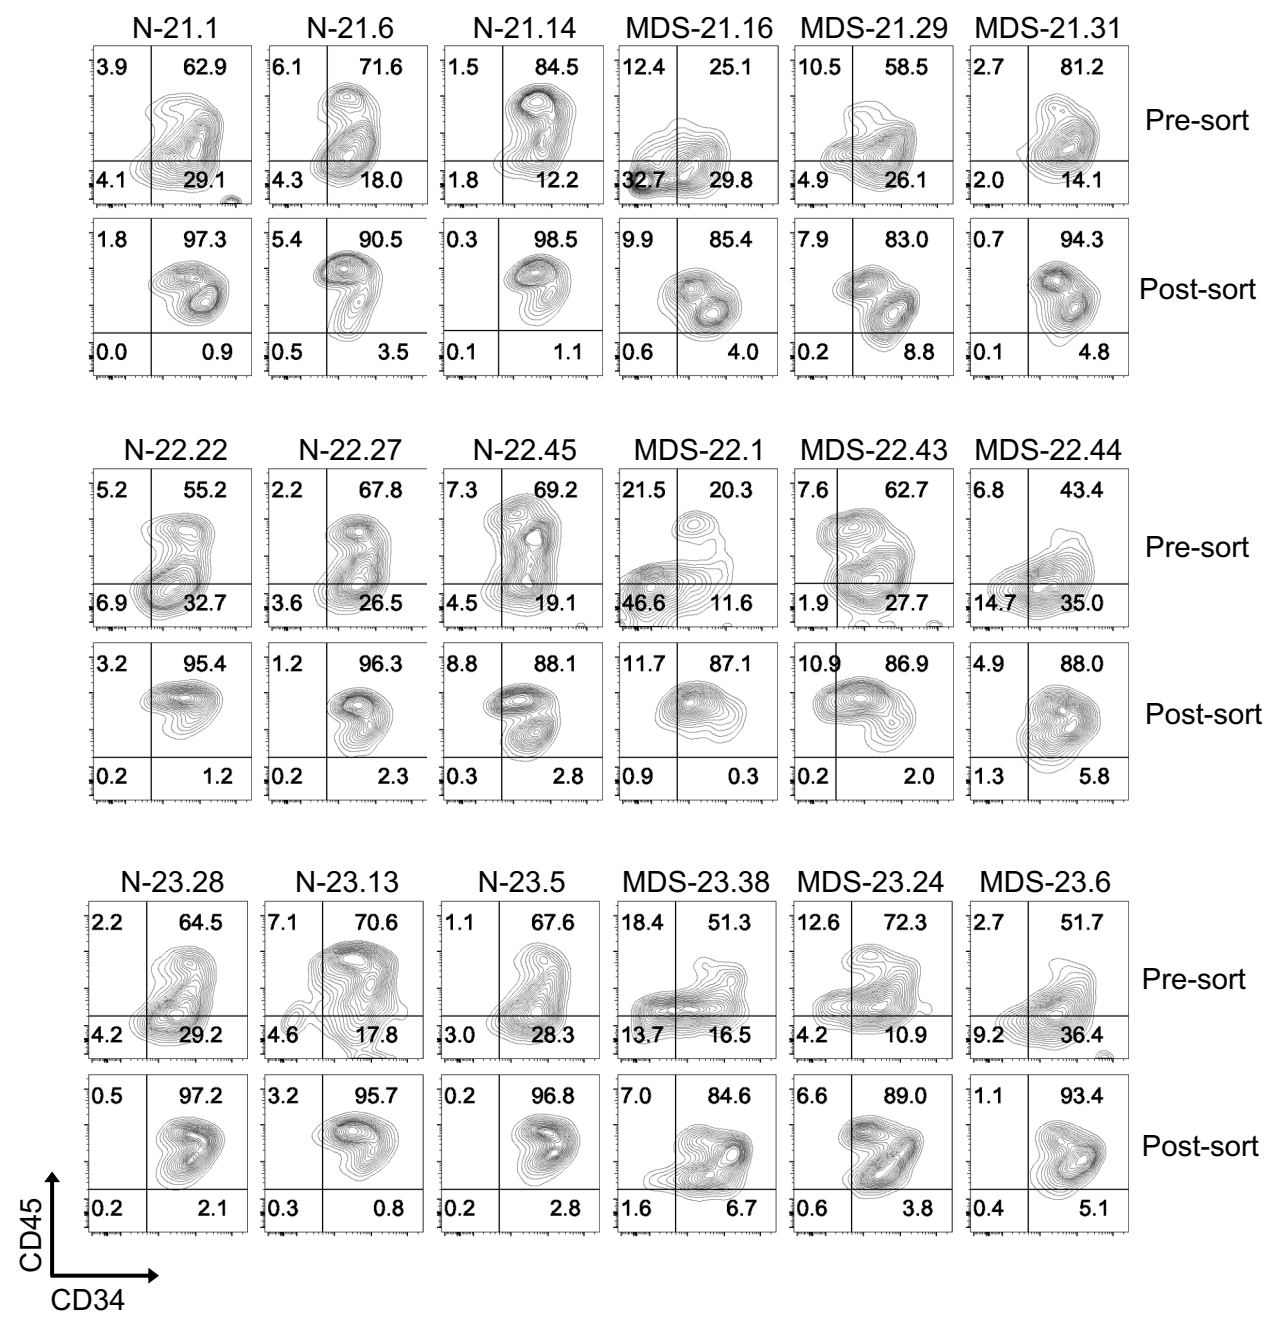

**Supplemental Figure 3. Sorted iPSC-HSPCs used for the RNA-seq and ATAC-seq analyses.**

**(A)** All iPSC lines were differentiated along the hematopoietic lineage and CD34+/CD45+ HSPCs were sorted for RNA-Seq and ATAC-seq analyses.

**(B)** Flow cytometric assessment of the purity of all MACS-sorted iPSC-HSPC samples used for the RNA-seq and ATAC-seq analyses.

# Supplemental Figure 4

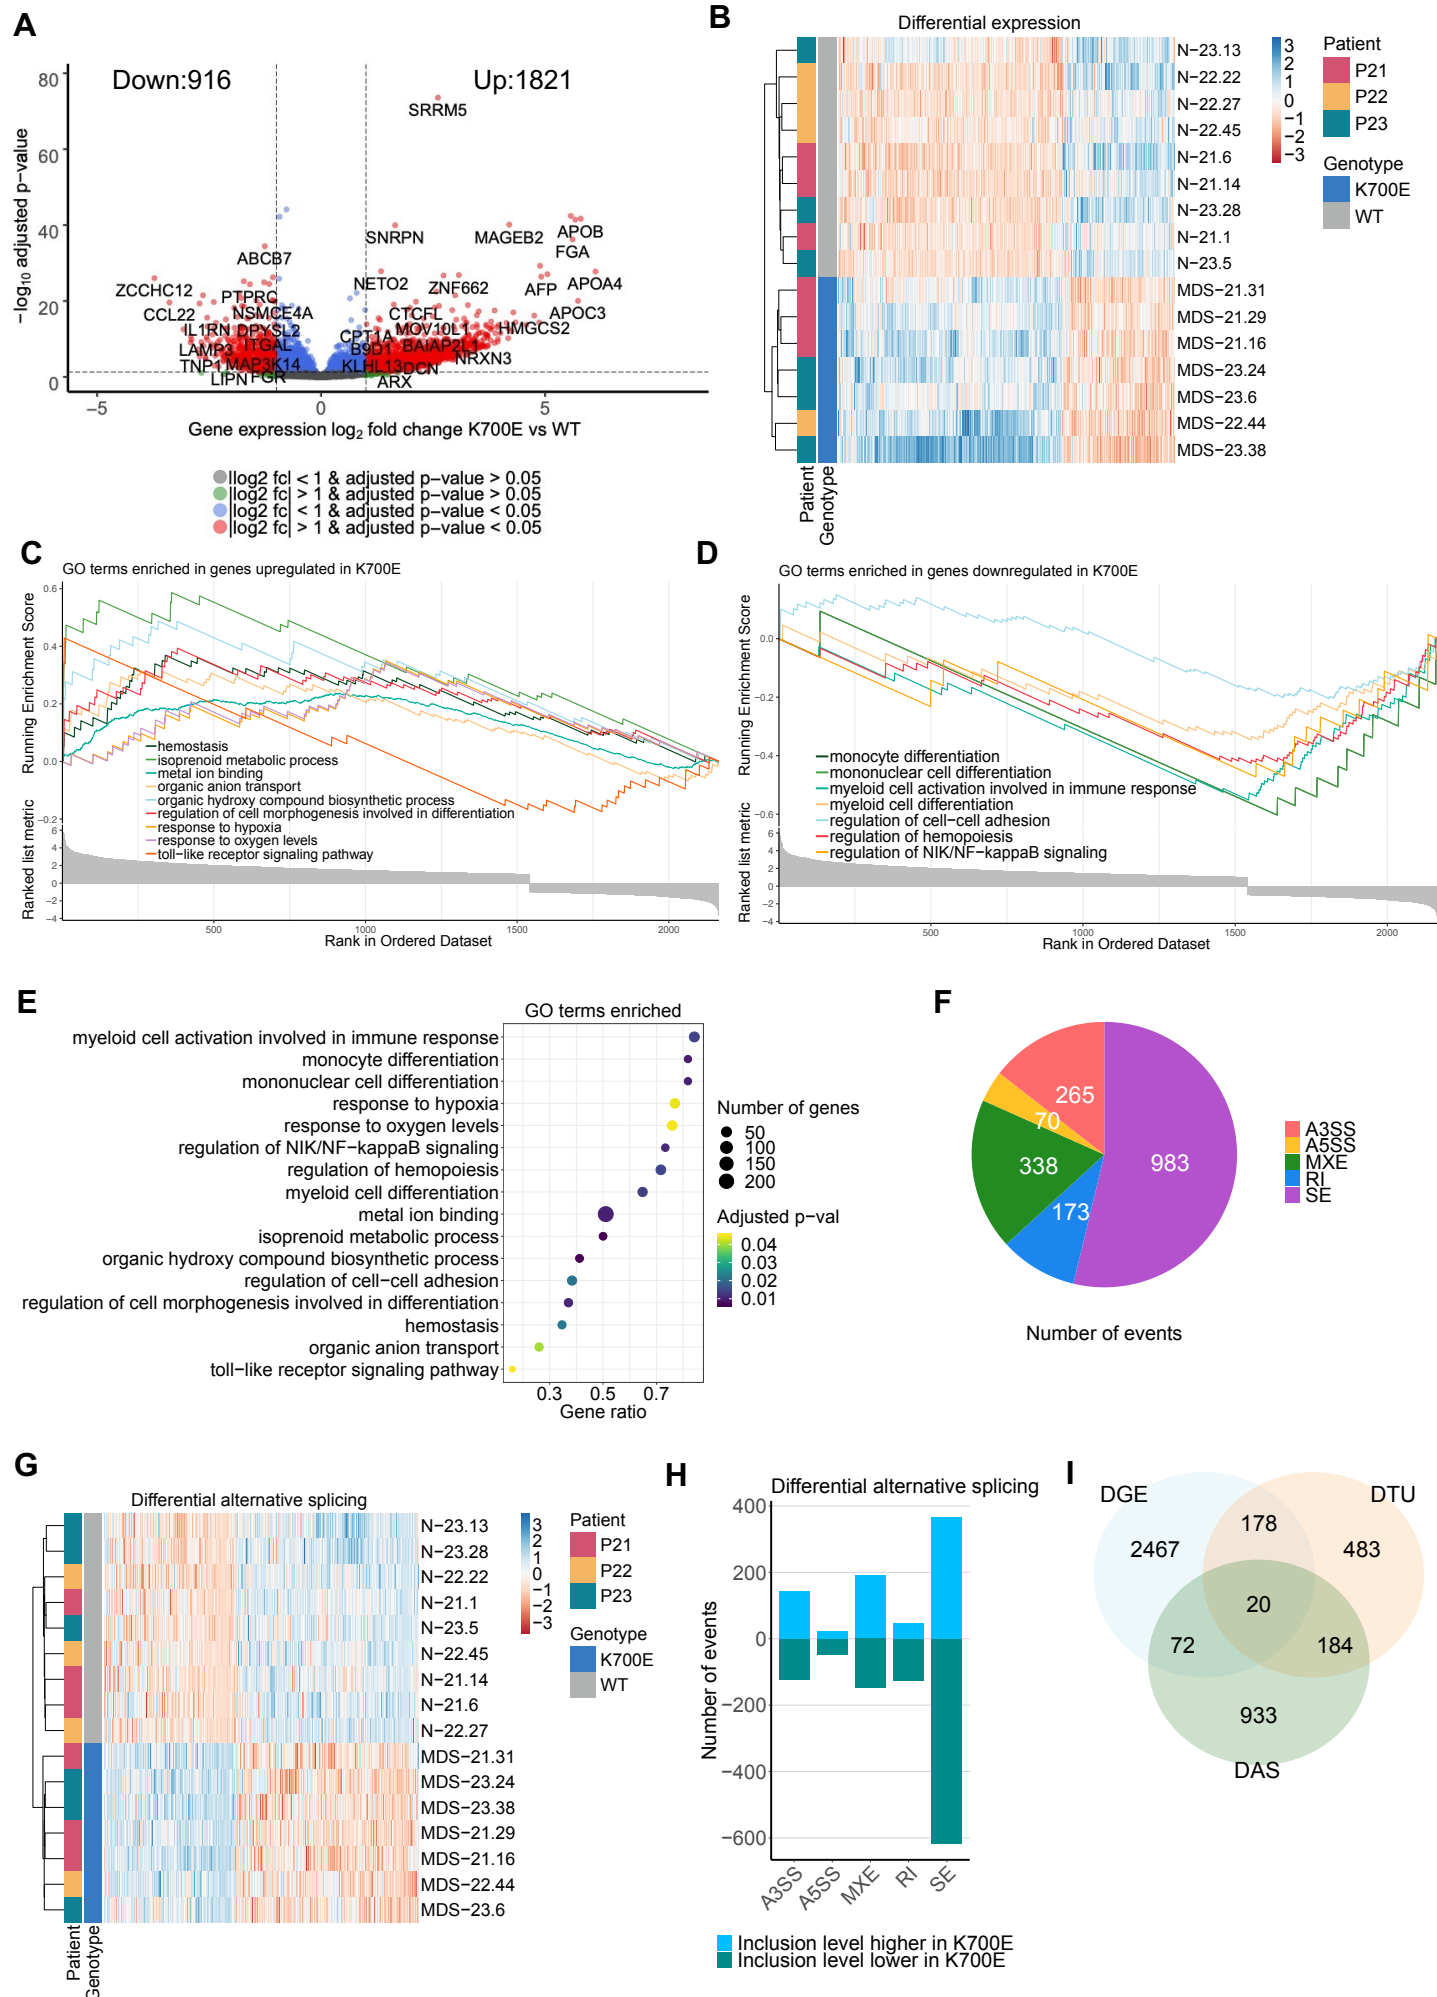

**Supplemental Figure 4. Gene expression, splicing and transcript usage analyses.**

**(A)** Volcano plot of differentially expressed genes between *SF3B1*<sup>K700E</sup> and *SF3B1*<sup>WT</sup> iPSC-HSPCs.

**(B)** Column-normalized heatmap of gene expression values of the differentially expressed genes between *SF3B1*<sup>K700E</sup> and *SF3B1*<sup>WT</sup> iPSC-HSPCs, color-coded by *SF3B1* mutation status and patient ID.

**(C,D)** GSEA plots of gene ontology (GO) gene sets enriched in genes upregulated (C) or downregulated (D) in *SF3B1*<sup>K700E</sup> vs *SF3B1*<sup>WT</sup> iPSC-HSPCs.

**(E)** Scatterplot of enriched GO terms.

**(F)** Distribution of the differential splicing events between *SF3B1*<sup>K700E</sup> and *SF3B1*<sup>WT</sup> iPSC-HSPCs by event type.

**(G)** Column-normalized heatmap of inclusion levels of the differentially spliced events between *SF3B1*<sup>K700E</sup> and *SF3B1*<sup>WT</sup> iPSC-HSPCs, color-coded by *SF3B1* mutation status and patient ID.

**(H)** Differential splicing events between *SF3B1*<sup>K700E</sup> and *SF3B1*<sup>WT</sup> iPSC-HSPCs.

**(I)** Overlap between differentially expressed genes, genes with differentially used transcripts and genes linked to differential splicing events between *SF3B1*<sup>K700E</sup> and *SF3B1*<sup>WT</sup> iPSC-HSPCs.

# Supplemental Figure 5

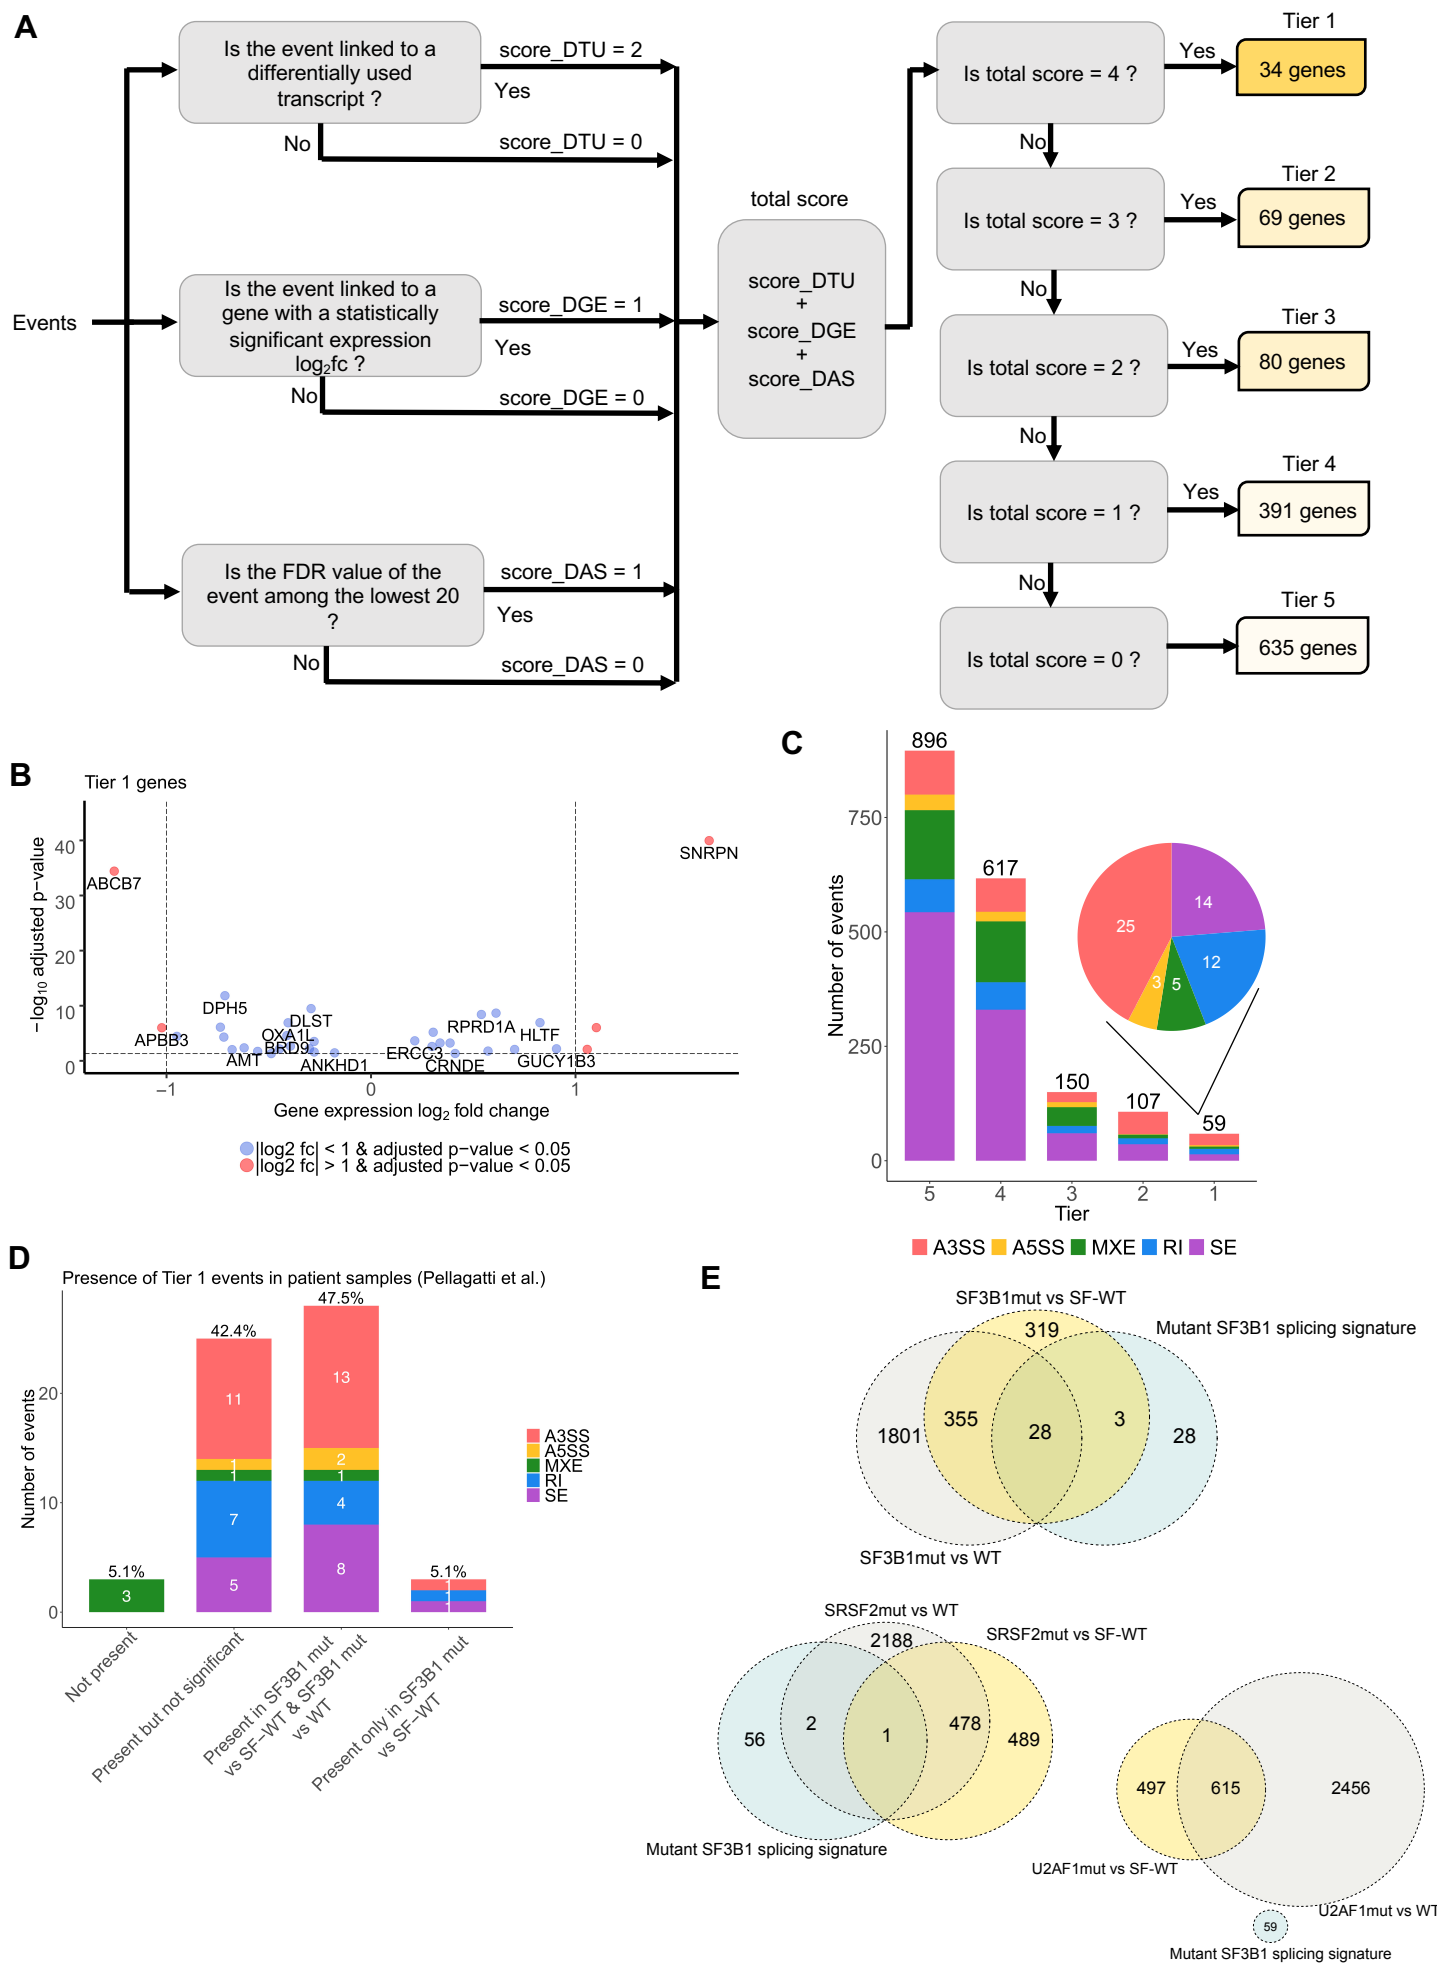

### **Supplemental Figure 5. Integration Framework**

**(A)** Schema used for the categorization of differential splicing events to 5 tier-based classes: tier 1, tier 2, tier 3, tier 4 and tier 5. The classification of each event to one of these classes is based on the following: (1) Presence of at least one differentially used transcript paired to the event (2) Statistically significant expression  $\log_2fc$  of the respective gene (3) Statistical significance of the event (FDR value among the lowest 20 FDR values across all events).

**(B)** Volcano plot of the tier 1 genes.

**(C)** Differential splicing events in each tier-based class color-coded per event type.

**(D)** Intersection of the tier 1 splicing events with the Pellagatti et al. dataset. Not present: tier 1 events not present in any comparison. Present but not significant: tier 1 events that were not statistically significant or/and had an absolute inclusion level difference  $< 0.1$  in both comparisons (SF3B1mut vs SF-WT & SF3B1mut vs WT, i.e. healthy individuals). Present in SF3B1mut vs SF-WT & SF3B1mut vs WT: tier 1 events statistically significant (FDR  $< 0.05$ ) and with an absolute inclusion level difference  $> 0.1$  in both comparisons. Present only in SF3B1mut vs SF-WT: tier 1 events statistically significant (FDR  $< 0.05$ ) and with an absolute inclusion level difference  $> 0.1$  only in the SF3B1mut vs SF-WT MDS patient comparison.

**(E)** Venn diagrams showing overlap of differential splicing events present in the respective comparisons from MDS patients from the Pellagatti et al. dataset and our mutant SF3B1 splicing signature. There is minimal or no overlap between the mutant SF3B1 splicing signature and differential splicing events found in MDS cases with *SRSF2* (lower left) or *U2AF1* (lower right) mutations.

# Supplemental Figure 6

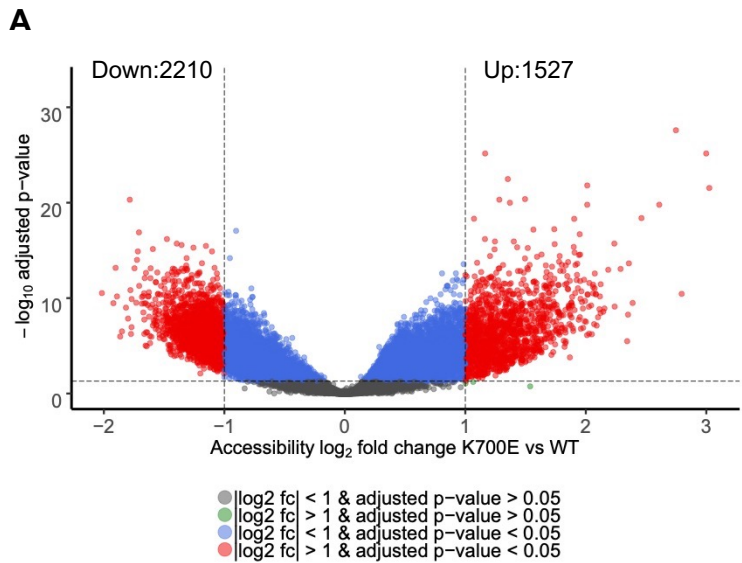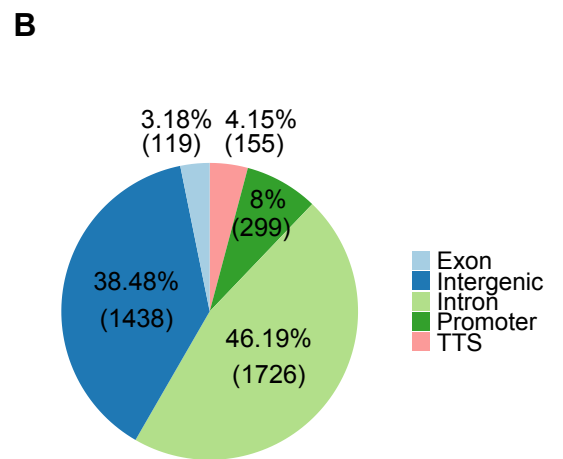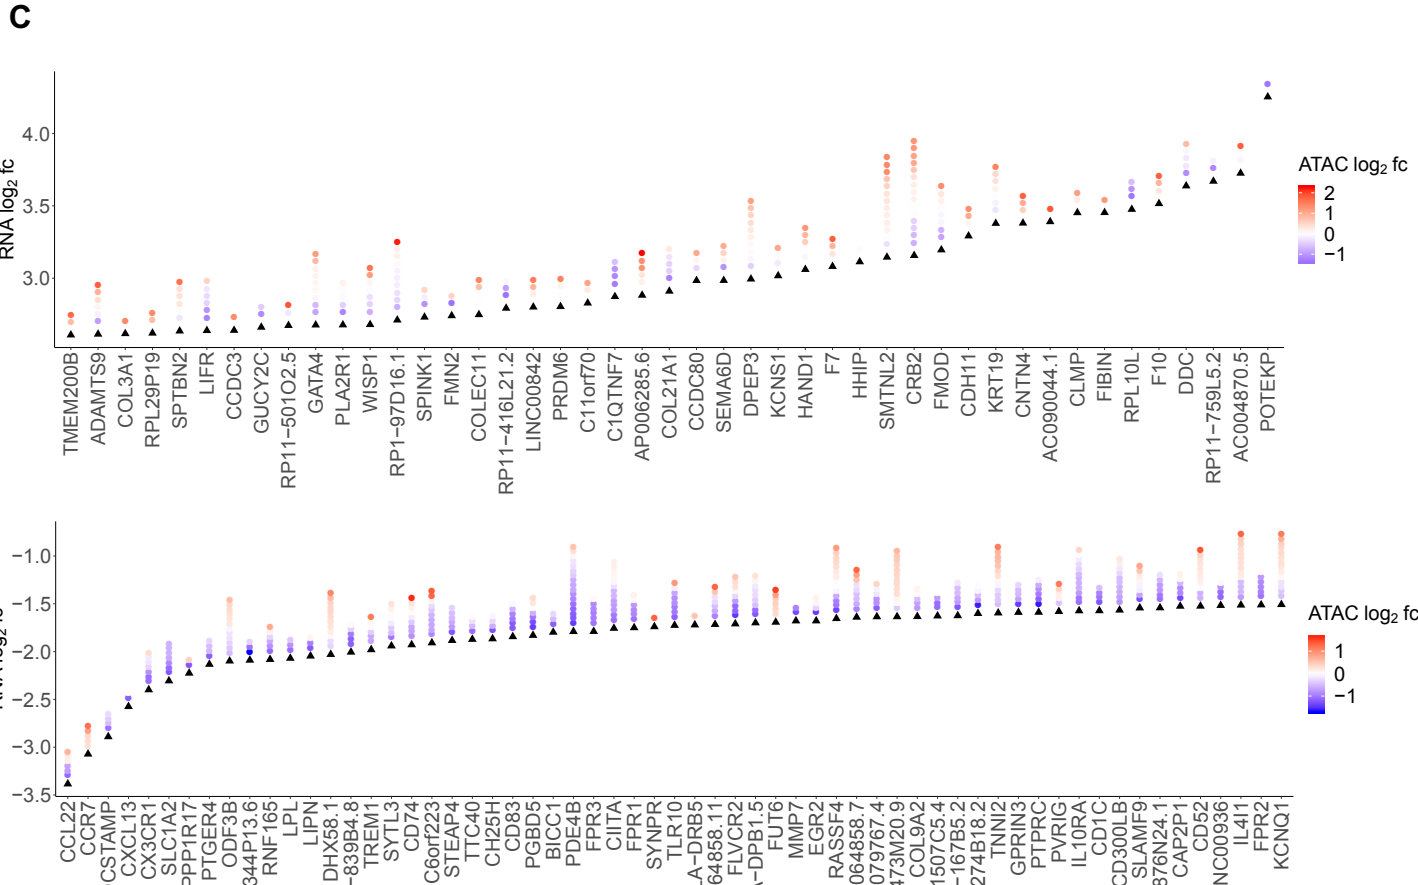



**Supplemental Figure 6. Chromatin accessibility analyses.**

**(A)** Volcano plot showing the differentially accessible peaks between *SF3B1*<sup>K700E</sup> and *SF3B1*<sup>WT</sup> iPSC-HSPCs

**(B)** Genomic distribution of the differentially accessible peaks between *SF3B1*<sup>K700E</sup> and *SF3B1*<sup>WT</sup> iPSC-HSPCs. (TTS: transcription termination site)

**(C)** Diamond plot showing the differentially accessible genes with the highest and lowest expression log<sub>2</sub>fc, together with the accessibility log<sub>2</sub>fc of the peaks associated with these respective genes. The black triangle shows the expression log<sub>2</sub>fc of each gene, and the points above correspond to all peaks associated with each gene. The peaks are color-coded based on their accessibility log<sub>2</sub>fc.

# Supplemental Figure 7

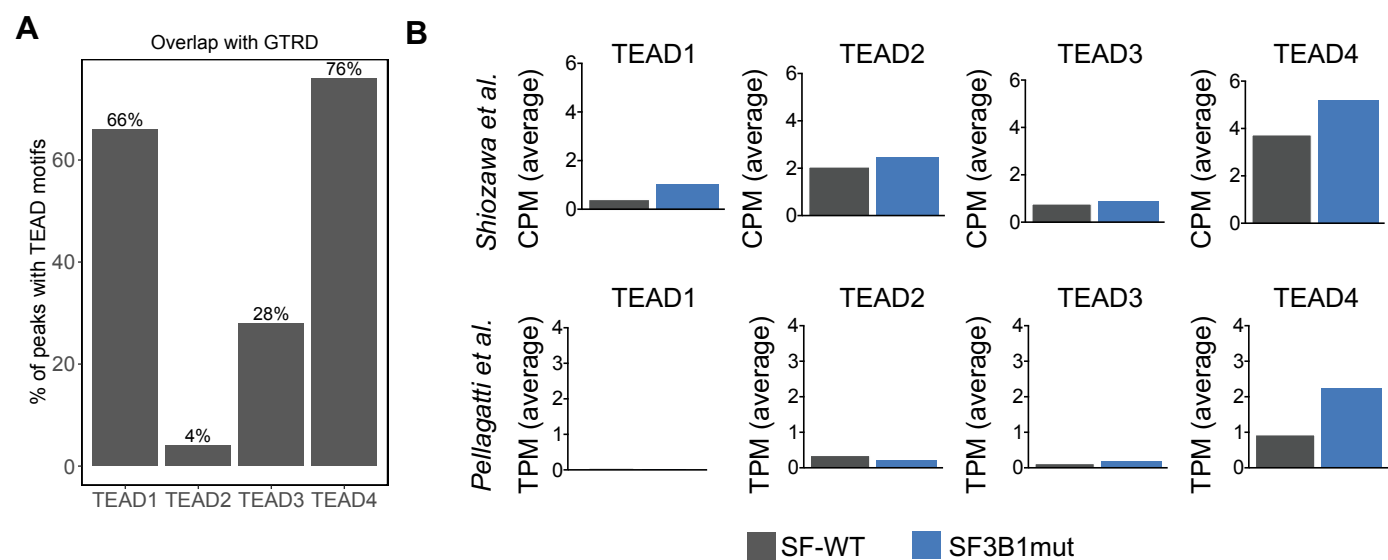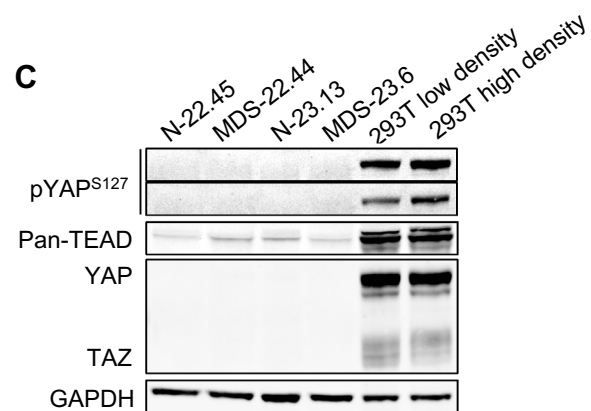

**Supplemental Figure 7. TEAD transcriptional activity in *SF3B1*<sup>K700E</sup> and *SF3B1*<sup>WT</sup> iPSC-HSPCs.**

**(A)** Percentage of peaks more accessible in *SF3B1*<sup>K700E</sup> compared to *SF3B1*<sup>WT</sup>HSPCs and linked to upregulated genes containing TEAD motifs that overlap with TEAD binding sites from the Gene Transcription Regulation Database (GTRD) across all samples.

**(B)** Expression of TEAD family genes in primary patient samples from Shiozawa et al. (upper panels) and Pellagatti et al. (lower panels). MDS SF3B1-MUT: MDS with isolated *SF3B1* mutation for the Shiozawa et al. dataset; MDS with isolated *SF3B1* K700E mutation for the Pellagatti et al. dataset., MDS SF-WT: MDS with no mutations in *SF3B1*, *SRSF2*, *U2AF1*, *ZRSR2*, *U2AF2*, *PRPF8*, *SF1* genes for the Shiozawa et al. dataset; MDS with no mutations in *SF3B1*, *SRSF2*, *U2AF1*, *ZRSR2* genes for the Pellagatti et al. dataset. CMP: counts per million; TPM: transcripts per million.

**(C)** Phosphorylated YAP, TEAD, total YAP and TAZ expression in HSPCs from the indicated iPSC lines on day 12 of differentiation and in 293T cells as positive control.

**Supplemental Table 1. Clinical, cytogenetic and mutational profile of MDS-RS patients selected for this study.** A pericentric inversion of chromosome 9 found in patient 23 is a polymorphic chromosomal rearrangement not linked to MDS<sup>9,10</sup>. The patients did not harbor additional MDS/AML-driver mutations other than the *SF3B1 K700E*. (They were selected for the study on the basis of isolated *SF3B1 K700E* mutation.)

**Supplemental Table 1**

| <b>Patient</b> | <b>Sex</b> | <b>Age</b> | <b>Diagnosis</b> | <b><i>SF3B1</i> K700E VAF</b> | <b>Cytogenetics</b>    |
|----------------|------------|------------|------------------|-------------------------------|------------------------|
| P21            | Male       | 74         | MDS-RS           | 0.42                          | 46, XY                 |
| P22            | Female     | 65         | MDS-RS           | 0.37                          | 46, XX, +mar           |
| P23            | Male       | 84         | MDS-RS           | 0.37                          | 46, XY, inv(9)(p11q13) |

**Supplemental Table 2. All iPSC lines used in this study.**

**Supplemental Table 2**

| Patient | iPSC line | Genotype | Phenotypic assays  |     |                    | RNA-Seq | ATAC-Seq |
|---------|-----------|----------|--------------------|-----|--------------------|---------|----------|
|         |           |          | Phenotypic markers | CFC | Competitive growth |         |          |
| P21     | N-21.1    | WT/WT    | +                  | +   | +                  | +       | -        |
| P21     | N-21.6    | WT/WT    | +                  | +   | -                  | +       | +        |
| P21     | N-21.14   | WT/WT    | +                  | +   | -                  | +       | +        |
| P21     | MDS-21.16 | WT/K700E | +                  | +   | +                  | +       | +        |
| P21     | MDS-21.29 | WT/K700E | +                  | +   | -                  | +       | +        |
| P21     | MDS-21.31 | WT/K700E | +                  | +   | -                  | +       | +        |
| P22     | N-22.22   | WT/WT    | +                  | +   | -                  | +       | +        |
| P22     | N-22.27   | WT/WT    | +                  | +   | +                  | +       | +        |
| P22     | N-22.45   | WT/WT    | +                  | +   | -                  | +       | +        |
| P22     | MDS-22.1  | WT/K700E | +                  | +   | -                  | -       | -        |
| P22     | MDS-22.43 | WT/K700E | -                  | -   | -                  | -       | -        |
| P22     | MDS-22.44 | WT/K700E | +                  | +   | +                  | +       | +        |
| P23     | N-23.5    | WT/WT    | +                  | +   | +                  | +       | +        |
| P23     | N-23.13   | WT/WT    | +                  | +   | -                  | +       | +        |
| P23     | N-23.28   | WT/WT    | +                  | +   | -                  | +       | +        |
| P23     | MDS-23.6  | WT/K700E | +                  | +   | +                  | +       | +        |
| P23     | MDS-23.24 | WT/K700E | +                  | +   | -                  | +       | +        |
| P23     | MDS-23.38 | WT/K700E | +                  | +   | -                  | +       | +        |

**Supplemental Table 3. Differential splicing events between *SF3B1*<sup>K700E</sup> and *SF3B1*<sup>WT</sup> iPSC-HSPCs.**



**Supplemental Table 3**

|    | Event Type | Gene    | Chromosome | Strand | Starting position | Ending Position | FDR         | Inclusion level difference |
|----|------------|---------|------------|--------|-------------------|-----------------|-------------|----------------------------|
| 1  | A3SS       | WDR62   | 19         | +      | 36593638          | 36593753        | 0.010373107 | 0.119                      |
| 2  | A3SS       | TMEM214 | 2          | +      | 27260657          | 27260760        | 0           | -0.471                     |
| 3  | A3SS       | AP5Z1   | 7          | +      | 4829844           | 4830222         | 3.88E-12    | -0.308                     |
| 4  | A3SS       | ZC3H11A | 1          | +      | 203771779         | 203772144       | 0           | 0.13                       |
| 5  | A3SS       | OXNAD1  | 3          | +      | 16312435          | 16312578        | 1.66E-12    | 0.127                      |
| 6  | A3SS       | MDM4    | 1          | +      | 204506557         | 204506625       | 1.58E-05    | 0.102                      |
| 7  | A3SS       | PDS5A   | 4          | -      | 39868480          | 39868635        | 0           | 0.126                      |
| 8  | A3SS       | FAM3A   | X          | -      | 153736804         | 153737142       | 0.000140606 | -0.321                     |
| 9  | A3SS       | FBXW5   | 9          | -      | 139837220         | 139837455       | 1.86E-07    | 0.442                      |
| 10 | A3SS       | LYPLAL1 | 1          | +      | 219383856         | 219383989       | 0           | 0.353                      |
| 11 | A3SS       | PER3    | 1          | +      | 7889893           | 7890221         | 0.018084666 | -0.199                     |
| 12 | A3SS       | FAM213B | 1          | +      | 2520360           | 2520479         | 0.035761572 | 0.111                      |
| 13 | A3SS       | ISG20   | 15         | +      | 89193465          | 89195541        | 0.00010643  | 0.117                      |
| 14 | A3SS       | ERVK3-1 | 19         | +      | 58823393          | 58823828        | 0           | -0.123                     |
| 15 | A3SS       | PSTPIP1 | 15         | +      | 77328142          | 77328276        | 0           | -0.217                     |
| 16 | A3SS       | TRIM66  | 11         | -      | 8642578           | 8642868         | 0.009058181 | -0.138                     |
| 17 | A3SS       | LARP4   | 12         | +      | 50822699          | 50822873        | 0           | 0.145                      |
| 18 | A3SS       | RNF44   | 5          | -      | 175959004         | 175959194       | 2.74E-05    | -0.252                     |
| 19 | A3SS       | ZNF419  | 19         | +      | 58001498          | 58001553        | 1.68E-06    | 0.216                      |
| 20 | A3SS       | CAPRIN2 | 12         | -      | 30872012          | 30873849        | 0.006798224 | -0.224                     |
| 21 | A3SS       | SERBP1  | 1          | -      | 67890570          | 67890660        | 0           | 0.286                      |
| 22 | A3SS       | ZNF707  | 8          | +      | 144770831         | 144771471       | 3.84E-07    | 0.128                      |
| 23 | A3SS       | MYRF    | 11         | +      | 61550969          | 61551072        | 3.02E-11    | 0.356                      |
| 24 | A3SS       | ANK1    | 8          | -      | 41529871          | 41530047        | 1.39E-07    | 0.142                      |
| 25 | A3SS       | ANK1    | 8          | -      | 41529871          | 41530430        | 8.17E-09    | 0.137                      |
| 26 | A3SS       | NICN1   | 3          | -      | 49462381          | 49462579        | 8.22E-13    | -0.112                     |
| 27 | A3SS       | FAM58A  | X          | -      | 152853389         | 152853912       | 0.011483904 | 0.101                      |
| 28 | A3SS       | NPRL2   | 3          | -      | 50385189          | 50385672        | 0.046932963 | -0.109                     |
| 29 | A3SS       | PPHLN1  | 12         | +      | 42839774          | 42840092        | 0           | 0.238                      |

|    |      |         |    |   |           |           |             |        |
|----|------|---------|----|---|-----------|-----------|-------------|--------|
| 30 | A3SS | RABGGTA | 14 | - | 24740318  | 24740454  | 0.020028001 | -0.117 |
| 31 | A3SS | ST5     | 11 | - | 8724118   | 8725158   | 2.71E-05    | 0.171  |
| 32 | A3SS | MUC1    | 1  | - | 155159205 | 155159367 | 1.62E-09    | -0.331 |
| 33 | A3SS | DNAJC10 | 2  | + | 183604271 | 183605115 | 1.21E-05    | -0.196 |
| 34 | A3SS | TMEM91  | 19 | + | 41889465  | 41889988  | 1.08E-11    | -0.137 |
| 35 | A3SS | TMEM91  | 19 | + | 41889767  | 41889988  | 9.30E-11    | -0.104 |
| 36 | A3SS | TMEM91  | 19 | + | 41889465  | 41889988  | 0.004672798 | -0.15  |
| 37 | A3SS | TMEM91  | 19 | + | 41889465  | 41889988  | 0           | -0.362 |
| 38 | A3SS | TMEM91  | 19 | + | 41889619  | 41889988  | 0.001516969 | -0.188 |
| 39 | A3SS | TMEM91  | 19 | + | 41889619  | 41889988  | 0           | -0.38  |
| 40 | A3SS | TMEM91  | 19 | + | 41889767  | 41889988  | 0           | -0.305 |
| 41 | A3SS | TMEM91  | 19 | + | 41889778  | 41889988  | 7.23E-13    | -0.286 |
| 42 | A3SS | CCDC24  | 1  | + | 44457824  | 44458059  | 0.005285673 | 0.231  |
| 43 | A3SS | PLA2G15 | 16 | + | 68289608  | 68289893  | 0.033199523 | 0.103  |
| 44 | A3SS | CAPN10  | 2  | + | 241535350 | 241535938 | 0.03613243  | -0.105 |
| 45 | A3SS | ZDHHC16 | 10 | + | 99215395  | 99215540  | 0           | 0.515  |
| 46 | A3SS | ZDHHC16 | 10 | + | 99215395  | 99215540  | 0           | 0.134  |
| 47 | A3SS | ANAPC5  | 12 | - | 121766118 | 121766300 | 6.31E-14    | 0.102  |
| 48 | A3SS | UXS1    | 2  | - | 106781191 | 106781255 | 0           | 0.337  |
| 49 | A3SS | TRIM37  | 17 | - | 57078958  | 57079102  | 0           | 0.291  |
| 50 | A3SS | GUCY1B3 | 4  | + | 156723364 | 156723731 | 0           | 0.109  |
| 51 | A3SS | EI24    | 11 | + | 125445146 | 125445304 | 0           | 0.137  |
| 52 | A3SS | ZMIZ2   | 7  | + | 44796545  | 44796748  | 1.80E-06    | 0.103  |
| 53 | A3SS | ZMIZ2   | 7  | + | 44796573  | 44796748  | 0.008616328 | 0.343  |
| 54 | A3SS | D2HGDH  | 2  | + | 242683036 | 242683230 | 1.99E-05    | 0.121  |
| 55 | A3SS | MAN2A2  | 15 | + | 91455746  | 91455894  | 1.41E-08    | 0.179  |
| 56 | A3SS | PPOX    | 1  | + | 161137128 | 161137276 | 2.01E-11    | 0.314  |
| 57 | A3SS | DLST    | 14 | + | 75356580  | 75356655  | 0           | 0.389  |
| 58 | A3SS | PLAGL1  | 6  | - | 144281605 | 144281693 | 0           | -0.168 |
| 59 | A3SS | PLAGL1  | 6  | - | 144281605 | 144281717 | 0           | -0.125 |
| 60 | A3SS | PLAGL1  | 6  | - | 144285923 | 144287367 | 0.000107524 | -0.227 |

|    |      |         |    |   |           |           |             |        |
|----|------|---------|----|---|-----------|-----------|-------------|--------|
| 61 | A3SS | PLAGL1  | 6  | - | 144287294 | 144287422 | 0.026080015 | -0.11  |
| 62 | A3SS | PLAGL1  | 6  | - | 144287294 | 144287422 | 0.007248587 | -0.141 |
| 63 | A3SS | MED24   | 17 | - | 38209721  | 38209910  | 0           | 0.15   |
| 64 | A3SS | ASB8    | 12 | - | 48543869  | 48543953  | 1.02E-05    | -0.171 |
| 65 | A3SS | LETMD1  | 12 | + | 51447560  | 51447643  | 0           | -0.263 |
| 66 | A3SS | ECHDC2  | 1  | - | 53370705  | 53372283  | 0           | -0.288 |
| 67 | A3SS | ECHDC2  | 1  | - | 53377394  | 53377693  | 3.26E-06    | 0.171  |
| 68 | A3SS | MPV17   | 2  | - | 27535860  | 27536021  | 0.01143894  | -0.101 |
| 69 | A3SS | ARIH1   | 15 | + | 72862504  | 72862648  | 0           | 0.119  |
| 70 | A3SS | ERGIC3  | 20 | + | 34144647  | 34144880  | 0           | -0.626 |
| 71 | A3SS | ERGIC3  | 20 | + | 34144725  | 34144880  | 0           | 0.195  |
| 72 | A3SS | DNASE1  | 16 | + | 3706964   | 3707112   | 0.037736166 | -0.14  |
| 73 | A3SS | CDC27   | 17 | - | 45229171  | 45229302  | 0           | 0.147  |
| 74 | A3SS | ARFGAP2 | 11 | - | 47195309  | 47195466  | 0           | 0.44   |
| 75 | A3SS | ARFGAP2 | 11 | - | 47195309  | 47195466  | 3.04E-07    | 0.142  |
| 76 | A3SS | SGSH    | 17 | - | 78188413  | 78188582  | 0.000126659 | 0.13   |
| 77 | A3SS | TCEA2   | 20 | + | 62703210  | 62703294  | 0           | 0.343  |
| 78 | A3SS | SRPK1   | 6  | - | 35858671  | 35858818  | 0.001446169 | 0.242  |
| 79 | A3SS | MVP     | 16 | + | 29841794  | 29841995  | 0           | 0.193  |
| 80 | A3SS | SUGP1   | 19 | - | 19414532  | 19414721  | 0           | -0.112 |
| 81 | A3SS | SUGP1   | 19 | - | 19414532  | 19414852  | 0           | -0.136 |
| 82 | A3SS | PTGR2   | 14 | + | 74343700  | 74346879  | 0.0077179   | 0.109  |
| 83 | A3SS | ZNF655  | 7  | + | 99159510  | 99160117  | 8.35E-07    | -0.116 |
| 84 | A3SS | ZNF655  | 7  | + | 99159966  | 99160117  | 0.004931123 | -0.147 |
| 85 | A3SS | ZNF655  | 7  | + | 99159971  | 99160117  | 0.00954366  | -0.14  |
| 86 | A3SS | THOC1   | 18 | - | 224083    | 224200    | 0           | 0.26   |
| 87 | A3SS | ZDHHC13 | 11 | + | 19187848  | 19192115  | 0.000334678 | -0.277 |
| 88 | A3SS | PAAF1   | 11 | + | 73597973  | 73598144  | 0.002521082 | -0.359 |
| 89 | A3SS | WDR31   | 9  | - | 116093263 | 116093396 | 0.002023179 | -0.158 |
| 90 | A3SS | RNF32   | 7  | + | 156450821 | 156450946 | 0.004827741 | -0.129 |
| 91 | A3SS | KDM1A   | 1  | + | 23399766  | 23399896  | 0           | 0.121  |

|     |      |            |    |   |           |           |             |        |
|-----|------|------------|----|---|-----------|-----------|-------------|--------|
| 92  | A3SS | ATG16L2    | 11 | + | 72532243  | 72532786  | 0.009271323 | -0.119 |
| 93  | A3SS | SNRPN      | 15 | + | 25219434  | 25219603  | 0           | -0.296 |
| 94  | A3SS | SNRPN      | 15 | + | 25219457  | 25219603  | 0           | -0.145 |
| 95  | A3SS | EFCAB2     | 1  | + | 245250034 | 245250263 | 0.004966998 | 0.108  |
| 96  | A3SS | SECISBP2   | 9  | + | 91940341  | 91940591  | 8.26E-10    | -0.129 |
| 97  | A3SS | FAM45A     | 10 | + | 120867459 | 120867676 | 1.24E-13    | 0.25   |
| 98  | A3SS | ATM        | 11 | + | 108124557 | 108124723 | 0.001619784 | -0.136 |
| 99  | A3SS | GIGYF2     | 2  | + | 233625189 | 233625301 | 0.000269018 | -0.148 |
| 100 | A3SS | BRD9       | 5  | - | 869359    | 869519    | 0           | 0.442  |
| 101 | A3SS | SLTM       | 15 | - | 59209133  | 59209219  | 0           | 0.207  |
| 102 | A3SS | PHF21A     | 11 | - | 46139472  | 46139696  | 0.001932331 | 0.203  |
| 103 | A3SS | HLTF       | 3  | - | 148759276 | 148759467 | 0           | 0.246  |
| 104 | A3SS | PCED1B-AS1 | 12 | - | 47599680  | 47599928  | 0.043009026 | 0.108  |
| 105 | A3SS | KCP        | 7  | - | 128533858 | 128534108 | 0.000768995 | 0.129  |
| 106 | A3SS | KIAA1033   | 12 | + | 105514866 | 105514982 | 0           | 0.28   |
| 107 | A3SS | SIGLEC10   | 19 | - | 51919919  | 51920060  | 0.001341086 | -0.126 |
| 108 | A3SS | SIGLEC10   | 19 | - | 51919919  | 51920204  | 6.02E-13    | -0.164 |
| 109 | A3SS | ANKHD1     | 5  | + | 139818045 | 139818202 | 0           | -0.524 |
| 110 | A3SS | ANKHD1     | 5  | + | 139818078 | 139818202 | 0           | 0.458  |
| 111 | A3SS | NECAB3     | 20 | - | 32258489  | 32258587  | 6.18E-05    | -0.186 |
| 112 | A3SS | TMEM218    | 11 | - | 124972027 | 124972247 | 0           | 0.531  |
| 113 | A3SS | TMEM218    | 11 | - | 124972027 | 124972247 | 0           | 0.355  |
| 114 | A3SS | RNF111     | 15 | + | 59376300  | 59376453  | 5.60E-07    | 0.139  |
| 115 | A3SS | ACTR2      | 2  | + | 65469105  | 65469197  | 5.91E-06    | -0.258 |
| 116 | A3SS | TCF7L2     | 10 | + | 114910741 | 114910882 | 9.75E-14    | 0.243  |
| 117 | A3SS | GTF2IRD1   | 7  | + | 73969722  | 73969824  | 0.025531804 | -0.115 |
| 118 | A3SS | UROS       | 10 | - | 127477851 | 127478097 | 0.020028001 | -0.11  |
| 119 | A3SS | SHKBP1     | 19 | + | 41084353  | 41084448  | 0           | 0.108  |
| 120 | A3SS | FAM65C     | 20 | - | 49211089  | 49211334  | 0           | -0.109 |
| 121 | A3SS | MYO15B     | 17 | + | 73587681  | 73587793  | 0           | 0.486  |
| 122 | A3SS | FLT3LG     | 19 | + | 49978930  | 49979058  | 0.002720979 | 0.141  |

|     |      |             |    |   |           |           |             |        |
|-----|------|-------------|----|---|-----------|-----------|-------------|--------|
| 123 | A3SS | APPL2       | 12 | - | 105601748 | 105601825 | 0           | 0.392  |
| 124 | A3SS | FAM111A     | 11 | + | 58916176  | 58916426  | 0.00035309  | -0.126 |
| 125 | A3SS | FAM111A     | 11 | + | 58916269  | 58916426  | 8.57E-06    | -0.2   |
| 126 | A3SS | XAF1        | 17 | + | 6662574   | 6663037   | 1.28E-06    | -0.153 |
| 127 | A3SS | COLEC12     | 18 | - | 333006    | 335230    | 5.19E-07    | -0.134 |
| 128 | A3SS | CEP192      | 18 | + | 13057583  | 13059311  | 0.006547986 | -0.169 |
| 129 | A3SS | SLC35C2     | 20 | - | 44983711  | 44983918  | 0.006510199 | -0.101 |
| 130 | A3SS | TNFRSF25    | 1  | - | 6522922   | 6523207   | 2.50E-05    | -0.265 |
| 131 | A3SS | FOXRED1     | 11 | + | 126143210 | 126143349 | 0           | 0.114  |
| 132 | A3SS | FOXRED1     | 11 | + | 126143210 | 126143349 | 1.84E-07    | 0.254  |
| 133 | A3SS | FHIT        | 3  | - | 59735035  | 59735305  | 1.81E-07    | -0.18  |
| 134 | A3SS | HSF4        | 16 | + | 67201363  | 67201502  | 0           | 0.66   |
| 135 | A3SS | MGAT4B      | 5  | - | 179228553 | 179228719 | 0.000437484 | 0.214  |
| 136 | A3SS | STAG3L5P-PV | 7  | + | 99947353  | 99947510  | 0           | 0.207  |
| 137 | A3SS | RPS9        | 19 | + | 54710420  | 54711515  | 0.016212243 | -0.108 |
| 138 | A3SS | PLEKHG2     | 19 | + | 39905631  | 39905900  | 0.000290935 | 0.107  |
| 139 | A3SS | IMMT        | 2  | - | 86398330  | 86398468  | 0           | 0.166  |
| 140 | A3SS | RPS15       | 19 | + | 1439959   | 1440252   | 0.000756704 | 0.264  |
| 141 | A3SS | STEAP1B     | 7  | - | 22532942  | 22533455  | 9.13E-08    | -0.155 |
| 142 | A3SS | CIB2        | 15 | - | 78401576  | 78401851  | 8.57E-06    | -0.22  |
| 143 | A3SS | TRMU        | 22 | + | 46746187  | 46746360  | 9.33E-05    | 0.103  |
| 144 | A3SS | PHF7        | 3  | + | 52455663  | 52456897  | 4.23E-08    | -0.189 |
| 145 | A3SS | SH3D21      | 1  | + | 36786656  | 36787379  | 0.037681137 | -0.13  |
| 146 | A3SS | SLFN12      | 17 | - | 33757489  | 33757632  | 0.003226639 | -0.22  |
| 147 | A3SS | STXBP2      | 19 | + | 7705583   | 7705695   | 5.84E-11    | -0.112 |
| 148 | A3SS | PRRG2       | 19 | + | 50086631  | 50086974  | 0.000162299 | 0.295  |
| 149 | A3SS | PHF20L1     | 8  | + | 133811328 | 133811418 | 0.000173316 | 0.217  |
| 150 | A3SS | CCDC14      | 3  | - | 123674689 | 123674962 | 0.000987952 | -0.105 |
| 151 | A3SS | APBB3       | 5  | - | 139941171 | 139941307 | 0           | 0.321  |
| 152 | A3SS | APBB3       | 5  | - | 139941171 | 139941307 | 0.023104781 | 0.184  |
| 153 | A3SS | EMC9        | 14 | - | 24608753  | 24609025  | 0.047351979 | 0.153  |

|     |      |          |    |   |           |           |             |        |
|-----|------|----------|----|---|-----------|-----------|-------------|--------|
| 154 | A3SS | KCNC4    | 1  | + | 110774842 | 110776666 | 0.000361125 | 0.157  |
| 155 | A3SS | ABLIM1   | 10 | - | 116207638 | 116207785 | 0.014681341 | 0.176  |
| 156 | A3SS | GPR108   | 19 | - | 6730997   | 6731122   | 0           | -0.214 |
| 157 | A3SS | C14orf93 | 14 | - | 23468262  | 23468611  | 2.19E-10    | -0.252 |
| 158 | A3SS | TBC1D7   | 6  | - | 13327018  | 13327195  | 1.15E-06    | 0.234  |
| 159 | A3SS | TBC1D7   | 6  | - | 13327018  | 13327195  | 0.011956163 | 0.125  |
| 160 | A3SS | CD200    | 3  | + | 112066404 | 112066677 | 0.002574161 | 0.124  |
| 161 | A3SS | RTN2     | 19 | - | 45998352  | 45998472  | 0.020028001 | 0.17   |
| 162 | A3SS | VEZT     | 12 | + | 95663814  | 95663964  | 0           | 0.334  |
| 163 | A3SS | PCBP4    | 3  | - | 51994541  | 51994658  | 0.019835501 | -0.111 |
| 164 | A3SS | RIN1     | 11 | - | 66101389  | 66101695  | 0.000204675 | -0.21  |
| 165 | A3SS | FGD4     | 12 | + | 32760871  | 32761029  | 3.56E-14    | 0.105  |
| 166 | A3SS | METTL5   | 2  | - | 170668966 | 170669034 | 0           | 0.141  |
| 167 | A3SS | METTL5   | 2  | - | 170668966 | 170669034 | 5.06E-11    | 0.255  |
| 168 | A3SS | TBC1D32  | 6  | - | 121638640 | 121638836 | 1.90E-07    | 0.354  |
| 169 | A3SS | ABCB7    | X  | - | 74291343  | 74291539  | 0           | 0.127  |
| 170 | A3SS | NSFL1C   | 20 | - | 1436358   | 1436515   | 5.02E-06    | -0.105 |
| 171 | A3SS | RALGAPB  | 20 | + | 37163716  | 37163850  | 1.04E-08    | 0.179  |
| 172 | A3SS | GORASP1  | 3  | - | 39141795  | 39141994  | 0           | -0.133 |
| 173 | A3SS | GORASP1  | 3  | - | 39141795  | 39141994  | 2.87E-14    | -0.21  |
| 174 | A3SS | GORASP1  | 3  | - | 39141795  | 39142368  | 4.01E-10    | -0.234 |
| 175 | A3SS | FBXO21   | 12 | - | 117595677 | 117595889 | 1.30E-06    | 0.177  |
| 176 | A3SS | RXRB     | 6  | - | 33163139  | 33163243  | 2.03E-08    | 0.144  |
| 177 | A3SS | CACNA2D1 | 7  | - | 81626494  | 81626566  | 0.000543755 | 0.377  |
| 178 | A3SS | CCDC125  | 5  | - | 68609811  | 68609873  | 0.000836682 | 0.112  |
| 179 | A3SS | ACAD11   | 3  | - | 132297639 | 132297900 | 0.002236499 | -0.11  |
| 180 | A3SS | CHD3     | 17 | + | 7797432   | 7797583   | 0.00014061  | 0.129  |
| 181 | A3SS | SLC25A39 | 17 | - | 42399786  | 42399920  | 3.46E-11    | 0.111  |
| 182 | A3SS | CIAPIN1  | 16 | - | 57474683  | 57474922  | 0           | -0.161 |
| 183 | A3SS | PIH1D1   | 19 | - | 49950594  | 49950677  | 0.047157125 | -0.181 |
| 184 | A3SS | SYNE1    | 6  | - | 152605112 | 152605319 | 0           | 0.514  |

|     |      |          |    |   |           |           |             |        |
|-----|------|----------|----|---|-----------|-----------|-------------|--------|
| 185 | A3SS | RNF41    | 12 | - | 56606779  | 56606922  | 1.83E-09    | -0.161 |
| 186 | A3SS | DEPDC5   | 22 | + | 32154512  | 32154619  | 0           | 0.143  |
| 187 | A3SS | MYCBP    | 1  | - | 39332551  | 39332681  | 0           | -0.381 |
| 188 | A3SS | CHERP    | 19 | - | 16641579  | 16641724  | 3.81E-05    | 0.154  |
| 189 | A3SS | TGFBR1   | 9  | + | 101894778 | 101895021 | 0           | 0.261  |
| 190 | A3SS | TBC1D17  | 19 | + | 50391413  | 50391574  | 5.35E-05    | -0.128 |
| 191 | A3SS | WDR45    | X  | - | 48934303  | 48934463  | 0.023313771 | -0.187 |
| 192 | A3SS | WDR45    | X  | - | 48934303  | 48934484  | 0.046975925 | -0.173 |
| 193 | A3SS | PAPD4    | 5  | + | 78938654  | 78938733  | 4.24E-14    | 0.14   |
| 194 | A3SS | HLA-C    | 6  | - | 31237269  | 31237320  | 0.00018317  | 0.116  |
| 195 | A3SS | DVL2     | 17 | - | 7130973   | 7131102   | 0           | -0.404 |
| 196 | A3SS | LAIR1    | 19 | - | 54875901  | 54876093  | 0.005626315 | 0.13   |
| 197 | A3SS | APOA2    | 1  | - | 161192707 | 161193056 | 7.35E-15    | -0.475 |
| 198 | A3SS | APOA2    | 1  | - | 161192707 | 161193056 | 3.73E-13    | -0.555 |
| 199 | A3SS | ZNF410   | 14 | + | 74360478  | 74360635  | 2.67E-08    | 0.334  |
| 200 | A3SS | ZNF410   | 14 | + | 74360478  | 74360635  | 0           | 0.296  |
| 201 | A3SS | CRTC2    | 1  | - | 153925046 | 153925126 | 0           | 0.188  |
| 202 | A3SS | LGALS12  | 11 | + | 63276246  | 63276463  | 0.000645135 | 0.142  |
| 203 | A3SS | ZSWIM8   | 10 | + | 75554298  | 75554397  | 0           | 0.194  |
| 204 | A3SS | ENTPD6   | 20 | + | 25205797  | 25205953  | 5.86E-06    | -0.101 |
| 205 | A3SS | CNOT7    | 8  | - | 17100950  | 17101131  | 0.010373107 | 0.128  |
| 206 | A3SS | ULK3     | 15 | - | 75134620  | 75134790  | 0.000151275 | -0.195 |
| 207 | A3SS | CCNL2    | 1  | - | 1326145   | 1328183   | 6.59E-05    | -0.126 |
| 208 | A3SS | ABCD4    | 14 | - | 74759450  | 74759951  | 0.007122013 | -0.123 |
| 209 | A3SS | ABCC5    | 3  | - | 183703091 | 183703243 | 0           | -0.441 |
| 210 | A3SS | GK5      | 3  | - | 141896323 | 141896447 | 1.02E-08    | 0.204  |
| 211 | A3SS | RUFY4    | 2  | + | 218954409 | 218955303 | 0.025172347 | 0.144  |
| 212 | A3SS | SLC25A37 | 8  | + | 23425771  | 23425891  | 0.000179498 | -0.133 |
| 213 | A3SS | CRNDE    | 16 | - | 54954209  | 54954250  | 7.33E-06    | -0.164 |
| 214 | A3SS | CRNDE    | 16 | - | 54954209  | 54954322  | 0           | -0.651 |
| 215 | A3SS | CRNDE    | 16 | - | 54954209  | 54954322  | 0           | -0.372 |

|     |      |          |    |   |           |           |             |        |
|-----|------|----------|----|---|-----------|-----------|-------------|--------|
| 216 | A3SS | RAD9A    | 11 | + | 67161161  | 67161261  | 3.22E-08    | -0.231 |
| 217 | A3SS | ERCC3    | 2  | - | 128046912 | 128047095 | 0           | 0.147  |
| 218 | A3SS | COASY    | 17 | + | 40714313  | 40714505  | 0           | -0.646 |
| 219 | A3SS | MOK      | 14 | - | 102698871 | 102699045 | 0.006583207 | -0.175 |
| 220 | A3SS | ZNF557   | 19 | + | 7075665   | 7075754   | 9.16E-07    | 0.205  |
| 221 | A3SS | STAU2    | 8  | - | 74621266  | 74621412  | 0           | 0.315  |
| 222 | A3SS | ABCC10   | 6  | + | 43410707  | 43411748  | 0.014145922 | 0.13   |
| 223 | A3SS | VPS13D   | 1  | + | 12401836  | 12401942  | 0.002381982 | -0.175 |
| 224 | A3SS | NR4A2    | 2  | - | 157185834 | 157186700 | 4.10E-08    | 0.111  |
| 225 | A3SS | ZNF561   | 19 | - | 9728766   | 9728855   | 0           | -0.33  |
| 226 | A3SS | GAS8     | 16 | + | 90097583  | 90097904  | 0           | 0.461  |
| 227 | A3SS | GAS8     | 16 | + | 90097597  | 90097904  | 2.30E-07    | 0.29   |
| 228 | A3SS | CCDC88B  | 11 | + | 64109973  | 64110152  | 6.16E-08    | -0.128 |
| 229 | A3SS | PTBP2    | 1  | + | 97278828  | 97279003  | 4.18E-05    | -0.307 |
| 230 | A3SS | TMEM116  | 12 | - | 112371689 | 112374634 | 0.026080015 | -0.123 |
| 231 | A3SS | FBXO17   | 19 | - | 39437111  | 39437245  | 0.000311803 | 0.108  |
| 232 | A3SS | ITGAL    | 16 | + | 30486609  | 30486721  | 0.003707971 | 0.173  |
| 233 | A3SS | SLC27A1  | 19 | + | 17597908  | 17598144  | 0.010544667 | -0.11  |
| 234 | A3SS | TMEM234  | 1  | - | 32680736  | 32681396  | 0.005626315 | -0.181 |
| 235 | A3SS | STRA6    | 15 | - | 74488348  | 74488595  | 0.032817805 | 0.124  |
| 236 | A3SS | GLS2     | 12 | - | 56868827  | 56868967  | 2.85E-06    | -0.267 |
| 237 | A3SS | HDAC7    | 12 | - | 48185653  | 48186452  | 0           | -0.159 |
| 238 | A3SS | STAU1    | 20 | - | 47740911  | 47741142  | 0           | 0.116  |
| 239 | A3SS | DBF4B    | 17 | + | 42818703  | 42818820  | 4.22E-08    | 0.176  |
| 240 | A3SS | MIER1    | 1  | + | 67394569  | 67394646  | 0.002330753 | -0.198 |
| 241 | A3SS | 6-Sep    | X  | - | 118759297 | 118759359 | 0           | 0.539  |
| 242 | A3SS | MIPOL1   | 14 | + | 37717003  | 37717112  | 0           | 0.374  |
| 243 | A3SS | PRICKLE4 | 6  | + | 41754177  | 41755563  | 0.003238069 | 0.306  |
| 244 | A3SS | EHMT1    | 9  | + | 140637822 | 140637980 | 0           | 0.274  |
| 245 | A3SS | CLCC1    | 1  | - | 109492930 | 109493070 | 7.62E-06    | -0.105 |
| 246 | A3SS | ZNF124   | 1  | - | 247322988 | 247323169 | 0           | 0.15   |



|     |      |              |    |   |           |           |             |        |
|-----|------|--------------|----|---|-----------|-----------|-------------|--------|
| 247 | A3SS | THBS3        | 1  | - | 155171747 | 155171905 | 0.006887993 | -0.115 |
| 248 | A3SS | CMTM7        | 3  | + | 32493557  | 32493965  | 0.007758982 | -0.12  |
| 249 | A3SS | ZCCHC11      | 1  | - | 52902426  | 52902647  | 0           | 0.264  |
| 250 | A3SS | ZCCHC11      | 1  | - | 52902426  | 52902650  | 0           | 0.264  |
| 251 | A3SS | SKIV2L       | 6  | + | 31936399  | 31936573  | 0           | 0.226  |
| 252 | A3SS | CLINT1       | 5  | - | 157216370 | 157216575 | 3.15E-11    | -0.132 |
| 253 | A3SS | BCAM         | 19 | + | 45315419  | 45315648  | 0           | -0.22  |
| 254 | A3SS | LINC01160    | 1  | - | 112144813 | 112144955 | 0.001532855 | -0.198 |
| 255 | A3SS | NASP         | 1  | + | 46070588  | 46070688  | 0           | 0.306  |
| 256 | A3SS | CAMTA2       | 17 | - | 4885383   | 4885470   | 0           | 0.234  |
| 257 | A3SS | CAMTA2       | 17 | - | 4885383   | 4885522   | 0           | -0.306 |
| 258 | A3SS | CAAP1        | 9  | - | 26884807  | 26884900  | 3.07E-05    | 0.259  |
| 259 | A3SS | DKFZP761J141 | 19 | + | 11468294  | 11468415  | 8.20E-05    | 0.133  |
| 260 | A3SS | CCBL1        | 9  | - | 131598275 | 131598384 | 0.014440969 | 0.175  |
| 261 | A3SS | NCOA7        | 6  | + | 126210084 | 126211127 | 0.004669665 | 0.154  |
| 262 | A3SS | CC2D1B       | 1  | - | 52823452  | 52823588  | 0.002361577 | -0.101 |
| 263 | A3SS | CIRBP        | 19 | + | 1273492   | 1273714   | 0           | -0.253 |
| 264 | A3SS | EXOC3L1      | 16 | - | 67222922  | 67223098  | 0           | 0.791  |
| 265 | A3SS | MED6         | 14 | - | 71059596  | 71059726  | 0           | 0.294  |
| 266 | A5SS | FBXL19       | 16 | + | 30939787  | 30939949  | 0.00436097  | -0.112 |
| 267 | A5SS | INTS8        | 8  | + | 95877733  | 95877928  | 0.048884241 | 0.105  |
| 268 | A5SS | MUTYH        | 1  | - | 45803857  | 45804328  | 0.003816649 | -0.195 |
| 269 | A5SS | RAD52        | 12 | - | 1038929   | 1039310   | 0.003147564 | -0.154 |
| 270 | A5SS | HUWE1        | X  | - | 53570801  | 53570929  | 6.34E-13    | -0.141 |
| 271 | A5SS | NDUFAF7      | 2  | + | 37468720  | 37468934  | 0.000138184 | -0.129 |
| 272 | A5SS | FCHO1        | 19 | + | 17865400  | 17865567  | 5.60E-06    | 0.137  |
| 273 | A5SS | PDXK         | 21 | + | 45152019  | 45152528  | 0.004589206 | 0.306  |
| 274 | A5SS | SGOL1        | 3  | - | 20215740  | 20216547  | 2.55E-06    | 0.101  |
| 275 | A5SS | AACS         | 12 | + | 125609250 | 125609570 | 1.98E-05    | -0.115 |
| 276 | A5SS | ARHGEF5      | 7  | + | 144059750 | 144062916 | 0.000472067 | -0.133 |
| 277 | A5SS | DHRS13       | 17 | - | 27229600  | 27230089  | 0.000602601 | -0.146 |

|     |      |          |    |   |           |           |             |        |
|-----|------|----------|----|---|-----------|-----------|-------------|--------|
| 278 | A5SS | ALDH3B1  | 11 | + | 67782766  | 67786106  | 0.001332456 | 0.159  |
| 279 | A5SS | CDK20    | 9  | - | 90585482  | 90585812  | 5.76E-06    | 0.344  |
| 280 | A5SS | CARD8    | 19 | - | 48735709  | 48737800  | 9.80E-09    | -0.195 |
| 281 | A5SS | ACSM1    | 16 | - | 20648060  | 20648773  | 0.013250915 | 0.163  |
| 282 | A5SS | PNISR    | 6  | - | 99851704  | 99852578  | 7.92E-14    | -0.137 |
| 283 | A5SS | TRMT2B   | X  | - | 100306772 | 100307105 | 0.008836584 | -0.139 |
| 284 | A5SS | SNRPN    | 15 | + | 25212175  | 25212387  | 0           | -0.14  |
| 285 | A5SS | NAA16    | 13 | + | 41936166  | 41937009  | 2.55E-06    | 0.111  |
| 286 | A5SS | TMEM218  | 11 | - | 124972532 | 124972705 | 5.76E-06    | 0.169  |
| 287 | A5SS | TMEM218  | 11 | - | 124972532 | 124972705 | 4.60E-08    | -0.188 |
| 288 | A5SS | PFDN5    | 12 | + | 53690213  | 53690335  | 1.97E-06    | 0.122  |
| 289 | A5SS | ALDH16A1 | 19 | + | 49964875  | 49965293  | 0.018745945 | -0.201 |
| 290 | A5SS | OGFOD2   | 12 | + | 123462527 | 123462746 | 0.016388394 | 0.137  |
| 291 | A5SS | KAT6B    | 10 | + | 76735156  | 76736088  | 0.041920944 | -0.127 |
| 292 | A5SS | ROBO3    | 11 | + | 124747414 | 124747648 | 0.004095294 | 0.259  |
| 293 | A5SS | ROBO3    | 11 | + | 124747414 | 124748027 | 0.010076781 | 0.165  |
| 294 | A5SS | TYROBP   | 19 | - | 36399069  | 36399197  | 1.56E-08    | 0.118  |
| 295 | A5SS | SELENBP1 | 1  | - | 151341479 | 151342245 | 3.41E-08    | -0.133 |
| 296 | A5SS | TLE1     | 9  | - | 84267098  | 84267203  | 0.0448024   | 0.111  |
| 297 | A5SS | TUBGCP4  | 15 | + | 43693913  | 43695997  | 0.006472608 | -0.138 |
| 298 | A5SS | CEP170   | 1  | - | 243305617 | 243305765 | 0.000205696 | 0.143  |
| 299 | A5SS | CLEC7A   | 12 | - | 10279169  | 10280444  | 2.04E-05    | -0.122 |
| 300 | A5SS | RPGRIP1  | 14 | + | 21789417  | 21789561  | 2.04E-05    | 0.202  |
| 301 | A5SS | MRRF     | 9  | + | 125047447 | 125048225 | 0.01026476  | -0.142 |
| 302 | A5SS | AASS     | 7  | - | 121718915 | 121719766 | 0.040165927 | -0.115 |
| 303 | A5SS | C11orf54 | 11 | + | 93475128  | 93475260  | 0.00201362  | 0.279  |
| 304 | A5SS | C11orf54 | 11 | + | 93475128  | 93475307  | 0.002962162 | 0.138  |
| 305 | A5SS | RPP30    | 10 | + | 92654531  | 92655240  | 0.001400267 | -0.145 |
| 306 | A5SS | RMND5B   | 5  | + | 177565108 | 177565397 | 0.008139711 | 0.102  |
| 307 | A5SS | SERHL2   | 22 | + | 42967126  | 42967907  | 3.06E-05    | -0.163 |
| 308 | A5SS | MTRF1    | 13 | - | 41836183  | 41836467  | 0.007973177 | -0.271 |

|     |      |            |    |   |           |           |             |        |
|-----|------|------------|----|---|-----------|-----------|-------------|--------|
| 309 | A5SS | TLL3       | 3  | + | 9874787   | 9874957   | 4.03E-05    | 0.187  |
| 310 | A5SS | DSN1       | 20 | - | 35399275  | 35399876  | 2.97E-12    | -0.111 |
| 311 | A5SS | TMEM128    | 4  | - | 4249327   | 4249939   | 7.58E-08    | 0.103  |
| 312 | A5SS | CD44       | 11 | + | 35229651  | 35229756  | 8.89E-08    | -0.273 |
| 313 | A5SS | CCDC84     | 11 | + | 118881930 | 118882021 | 0.000197544 | -0.156 |
| 314 | A5SS | CIZ1       | 9  | - | 130941267 | 130941694 | 2.26E-05    | -0.16  |
| 315 | A5SS | ZNF266     | 19 | - | 9529437   | 9529975   | 0.027933523 | -0.104 |
| 316 | A5SS | TMEM175    | 4  | + | 941903    | 942403    | 7.60E-13    | -0.104 |
| 317 | A5SS | PPM1M      | 3  | + | 52282168  | 52282469  | 0.021584662 | -0.127 |
| 318 | A5SS | PIK3R6     | 17 | - | 8741612   | 8741972   | 7.89E-05    | -0.113 |
| 319 | A5SS | FAM73B     | 9  | + | 131830476 | 131831254 | 0.00249039  | -0.153 |
| 320 | A5SS | ABCG1      | 21 | + | 43707998  | 43708183  | 0.043924114 | -0.281 |
| 321 | A5SS | CTNND1     | 11 | + | 57529268  | 57529591  | 0.043924114 | -0.109 |
| 322 | A5SS | AGER       | 6  | - | 32150315  | 32150475  | 0.016864089 | -0.334 |
| 323 | A5SS | SLC25A37   | 8  | + | 23423620  | 23424326  | 2.83E-06    | -0.112 |
| 324 | A5SS | ITGB1      | 10 | - | 33222278  | 33222511  | 0.022493232 | -0.112 |
| 325 | A5SS | ZCWPW1     | 7  | - | 100016624 | 100016812 | 0.000912639 | -0.261 |
| 326 | A5SS | ANKZF1     | 2  | + | 220094949 | 220095127 | 0.027995325 | -0.282 |
| 327 | A5SS | IDH3G      | X  | - | 153056250 | 153056306 | 0.004095294 | -0.366 |
| 328 | A5SS | HDHD2      | 18 | - | 44662672  | 44662820  | 0.000105121 | 0.102  |
| 329 | A5SS | SDR39U1    | 14 | - | 24911303  | 24911466  | 0.040165927 | -0.127 |
| 330 | A5SS | SDR39U1    | 14 | - | 24911314  | 24911466  | 0.013234972 | -0.139 |
| 331 | A5SS | CLPTM1L    | 5  | - | 1324877   | 1325931   | 0           | -0.124 |
| 332 | A5SS | BTAF1      | 10 | + | 93718821  | 93719039  | 1.05E-06    | -0.18  |
| 333 | A5SS | LYRM5      | 12 | + | 25356658  | 25356766  | 0.03337428  | -0.103 |
| 334 | A5SS | METTL20    | 12 | + | 31812621  | 31813003  | 0.032790803 | -0.235 |
| 335 | A5SS | PCNT       | 21 | + | 47851442  | 47852129  | 0.007626979 | -0.125 |
| 336 | MXE  | HLCS       | 21 | - | 38318308  | 38318454  | 0.018389726 | -0.212 |
| 337 | MXE  | AP000347.2 | 22 | - | 24047615  | 24047728  | 1.23E-05    | -0.128 |
| 338 | MXE  | TMEM214    | 2  | + | 27260682  | 27260760  | 0           | 0.292  |
| 339 | MXE  | TMEM214    | 2  | + | 27261013  | 27261105  | 3.84E-12    | -0.133 |

|     |     |            |    |   |           |           |             |        |
|-----|-----|------------|----|---|-----------|-----------|-------------|--------|
| 340 | MXE | TMEM214    | 2  | + | 27261013  | 27261105  | 0           | 0.294  |
| 341 | MXE | IL9R       | X  | + | 155232570 | 155232684 | 1.97E-05    | 0.169  |
| 342 | MXE | AP5Z1      | 7  | + | 4829844   | 4830222   | 7.31E-12    | -0.131 |
| 343 | MXE | ZC3H11A    | 1  | + | 203765578 | 203765729 | 0.000778599 | 0.152  |
| 344 | MXE | DEF8       | 16 | + | 90028144  | 90028272  | 0.00957429  | -0.108 |
| 345 | MXE | MDM4       | 1  | + | 204499811 | 204499945 | 7.74E-10    | -0.132 |
| 346 | MXE | MDM4       | 1  | + | 204501318 | 204501374 | 1.23E-12    | 0.194  |
| 347 | MXE | AC093415.2 | 3  | - | 37862504  | 37862591  | 8.81E-06    | -0.124 |
| 348 | MXE | AC093415.2 | 3  | - | 37862504  | 37862591  | 0.001632457 | -0.194 |
| 349 | MXE | AC093415.2 | 3  | - | 37862504  | 37862591  | 1.91E-08    | -0.214 |
| 350 | MXE | FAM3A      | X  | - | 153736619 | 153736678 | 0.002015967 | 0.16   |
| 351 | MXE | LEKR1      | 3  | + | 156570556 | 156570771 | 1.52E-05    | -0.141 |
| 352 | MXE | SLIT1      | 10 | - | 98764449  | 98764580  | 0.043715693 | -0.127 |
| 353 | MXE | CCDC102B   | 18 | + | 66564455  | 66564665  | 0.002204771 | -0.124 |
| 354 | MXE | FAM208B    | 10 | + | 5754785   | 5754881   | 0.00065159  | 0.109  |
| 355 | MXE | SEC16A     | 9  | - | 139358037 | 139358192 | 0.016387118 | 0.161  |
| 356 | MXE | SMURF2     | 17 | - | 62567915  | 62568074  | 4.16E-07    | -0.122 |
| 357 | MXE | GRK4       | 4  | + | 3024140   | 3024178   | 0.00161833  | -0.103 |
| 358 | MXE | NDUFAF7    | 2  | + | 37468720  | 37468780  | 0.005104819 | 0.18   |
| 359 | MXE | SDCCAG8    | 1  | + | 243589728 | 243589860 | 0.021445969 | -0.104 |
| 360 | MXE | MDH1B      | 2  | - | 207613743 | 207613907 | 0.032027146 | -0.171 |
| 361 | MXE | PACSIN2    | 22 | - | 43289462  | 43289619  | 0.007116277 | 0.147  |
| 362 | MXE | TPM1       | 15 | + | 63353396  | 63353472  | 0           | -0.101 |
| 363 | MXE | ADAMTS12   | 5  | - | 33751508  | 33751653  | 0.006864766 | -0.13  |
| 364 | MXE | TPT1-AS1   | 13 | + | 45926031  | 45926149  | 1.24E-05    | -0.156 |
| 365 | MXE | ZFYVE27    | 10 | + | 99498233  | 99498431  | 8.81E-06    | 0.16   |
| 366 | MXE | ZFYVE27    | 10 | + | 99498233  | 99498431  | 4.62E-05    | 0.141  |
| 367 | MXE | ZFYVE27    | 10 | + | 99504485  | 99504672  | 0.000460808 | -0.114 |
| 368 | MXE | ZNF185     | X  | + | 152089250 | 152089292 | 0.040353336 | -0.111 |
| 369 | MXE | ZNF185     | X  | + | 152091263 | 152091353 | 0.000141127 | -0.21  |
| 370 | MXE | CARF       | 2  | + | 203825959 | 203826149 | 0.003705333 | -0.113 |

|     |     |               |    |   |           |           |             |        |
|-----|-----|---------------|----|---|-----------|-----------|-------------|--------|
| 371 | MXE | ENDOV         | 17 | + | 78391580  | 78391745  | 0.015973459 | -0.241 |
| 372 | MXE | ANXA2         | 15 | - | 60682411  | 60682516  | 0.007803772 | 0.117  |
| 373 | MXE | ST7L          | 1  | - | 113093222 | 113093315 | 2.03E-06    | -0.108 |
| 374 | MXE | ECT2          | 3  | + | 172473272 | 172473365 | 0           | 0.143  |
| 375 | MXE | ECT2          | 3  | + | 172474772 | 172474955 | 7.21E-09    | 0.122  |
| 376 | MXE | FANK1         | 10 | + | 127685988 | 127686054 | 0.000318319 | -0.263 |
| 377 | MXE | PGAP2         | 11 | + | 3832479   | 3832654   | 0.002489145 | -0.101 |
| 378 | MXE | PAPPA         | 9  | + | 119094611 | 119094747 | 0.018641159 | 0.3    |
| 379 | MXE | PILRB         | 7  | + | 99936395  | 99936512  | 0           | 0.115  |
| 380 | MXE | PILRB         | 7  | + | 99947421  | 99947510  | 0           | -0.115 |
| 381 | MXE | KLRF1         | 12 | + | 9985898   | 9986048   | 0.000426859 | 0.228  |
| 382 | MXE | DNAJC10       | 2  | + | 183597225 | 183597269 | 0.004815858 | 0.202  |
| 383 | MXE | ADAM32        | 8  | + | 39027434  | 39027516  | 0.00223166  | 0.329  |
| 384 | MXE | ZNF107        | 7  | + | 64129414  | 64129556  | 0.029883719 | -0.188 |
| 385 | MXE | HSD17B6       | 12 | + | 57157001  | 57157198  | 0.043019167 | -0.145 |
| 386 | MXE | CCDC62        | 12 | + | 123270265 | 123270367 | 0.00015153  | 0.333  |
| 387 | MXE | GS1-259H13.10 | 7  | + | 99197830  | 99197908  | 0.01512958  | -0.148 |
| 388 | MXE | ZDHHC16       | 10 | + | 99215395  | 99215540  | 0           | 0.16   |
| 389 | MXE | RP11-248J23.6 | 10 | + | 97712079  | 97712182  | 0.038591305 | -0.126 |
| 390 | MXE | ST3GAL6-AS1   | 3  | - | 98434219  | 98434365  | 0.040735727 | 0.258  |
| 391 | MXE | RP11-333E1.1  | 17 | + | 5113044   | 5113190   | 0.000249265 | -0.183 |
| 392 | MXE | RP11-333E1.1  | 17 | + | 5118441   | 5118588   | 0.003677848 | 0.152  |
| 393 | MXE | TRIM37        | 17 | - | 57089688  | 57089807  | 6.70E-08    | 0.112  |
| 394 | MXE | TRIM37        | 17 | - | 57089688  | 57089807  | 5.51E-09    | 0.129  |
| 395 | MXE | TRIM37        | 17 | - | 57138392  | 57138469  | 0.000157837 | -0.104 |
| 396 | MXE | P2RX5         | 17 | - | 3591919   | 3592053   | 0.046391409 | -0.202 |
| 397 | MXE | RPL34-AS1     | 4  | - | 109519693 | 109519851 | 0.004788718 | 0.182  |
| 398 | MXE | CDKL3         | 5  | - | 133644264 | 133644418 | 0.029149915 | -0.145 |
| 399 | MXE | CDKL3         | 5  | - | 133647982 | 133648071 | 0.039811299 | -0.116 |
| 400 | MXE | PPOX          | 1  | + | 161137128 | 161137276 | 0.00019335  | 0.21   |
| 401 | MXE | PPOX          | 1  | + | 161137128 | 161137276 | 5.04E-10    | 0.164  |

|     |     |               |    |   |           |           |             |        |
|-----|-----|---------------|----|---|-----------|-----------|-------------|--------|
| 402 | MXE | PPOX          | 1  | + | 161137128 | 161137276 | 7.56E-10    | 0.159  |
| 403 | MXE | PPOX          | 1  | + | 161137128 | 161137276 | 2.25E-10    | 0.122  |
| 404 | MXE | PPOX          | 1  | + | 161137128 | 161137276 | 4.20E-08    | 0.131  |
| 405 | MXE | DLST          | 14 | + | 75349293  | 75349327  | 0           | -0.497 |
| 406 | MXE | DLST          | 14 | + | 75352288  | 75352337  | 0           | 0.11   |
| 407 | MXE | DLST          | 14 | + | 75352288  | 75352337  | 0           | -0.172 |
| 408 | MXE | DLST          | 14 | + | 75356580  | 75356655  | 0           | 0.322  |
| 409 | MXE | DLST          | 14 | + | 75356599  | 75356655  | 2.81E-10    | -0.148 |
| 410 | MXE | FBXL13        | 7  | - | 102462829 | 102462887 | 0.01613661  | -0.131 |
| 411 | MXE | MFF           | 2  | + | 228211941 | 228212100 | 6.18E-08    | -0.108 |
| 412 | MXE | ALB           | 4  | + | 74283247  | 74283386  | 0.002596912 | 0.251  |
| 413 | MXE | CARD8         | 19 | - | 48735709  | 48737800  | 1.69E-05    | 0.129  |
| 414 | MXE | CARD8         | 19 | - | 48744218  | 48744320  | 0.000319465 | -0.132 |
| 415 | MXE | SIPA1L1       | 14 | + | 71867510  | 71867635  | 0.012016752 | -0.173 |
| 416 | MXE | SEC24D        | 4  | - | 119679566 | 119679782 | 0.044077979 | 0.415  |
| 417 | MXE | RP11-274B21.1 | 7  | + | 128218017 | 128218087 | 0           | 0.688  |
| 418 | MXE | RP11-274B21.1 | 7  | + | 128218017 | 128218087 | 0           | 0.296  |
| 419 | MXE | LETMD1        | 12 | + | 51445874  | 51445990  | 7.50E-06    | 0.122  |
| 420 | MXE | LETMD1        | 12 | + | 51445874  | 51445990  | 2.83E-06    | 0.128  |
| 421 | MXE | LETMD1        | 12 | + | 51445874  | 51445990  | 0.000178052 | -0.122 |
| 422 | MXE | LETMD1        | 12 | + | 51447560  | 51447643  | 1.42E-05    | -0.102 |
| 423 | MXE | FAM49B        | 8  | - | 130891842 | 130892035 | 0.038455694 | 0.138  |
| 424 | MXE | MPV17         | 2  | - | 27535360  | 27535456  | 0.013367821 | -0.146 |
| 425 | MXE | MPV17         | 2  | - | 27535546  | 27535639  | 0.022344573 | -0.114 |
| 426 | MXE | FAM13A        | 4  | - | 89726161  | 89726203  | 0.023602375 | 0.231  |
| 427 | MXE | POLM          | 7  | - | 44113729  | 44114129  | 0.003426806 | 0.118  |
| 428 | MXE | CCDC17        | 1  | - | 46087309  | 46087407  | 3.43E-05    | -0.333 |
| 429 | MXE | ZFPM2         | 8  | + | 106807983 | 106808125 | 0.007103356 | 0.24   |
| 430 | MXE | BTBD19        | 1  | + | 45276225  | 45276279  | 0.000665397 | -0.161 |
| 431 | MXE | ELMOD3        | 2  | + | 85582198  | 85582293  | 0.001201314 | -0.149 |
| 432 | MXE | LRRFIP1       | 2  | + | 238628165 | 238628210 | 0.024647053 | -0.138 |

|     |     |              |    |   |           |           |             |        |
|-----|-----|--------------|----|---|-----------|-----------|-------------|--------|
| 433 | MXE | LRRFIP1      | 2  | + | 238636518 | 238636578 | 0.013171173 | -0.119 |
| 434 | MXE | GUSBP11      | 22 | - | 24036305  | 24037704  | 0           | 0.118  |
| 435 | MXE | GUSBP11      | 22 | - | 24036305  | 24037704  | 6.21E-13    | 0.108  |
| 436 | MXE | GUSBP11      | 22 | - | 24037359  | 24037704  | 1.28E-09    | 0.276  |
| 437 | MXE | GUSBP11      | 22 | - | 24037359  | 24037704  | 5.20E-05    | 0.149  |
| 438 | MXE | GUSBP11      | 22 | - | 24042912  | 24043032  | 0           | -0.228 |
| 439 | MXE | GUSBP11      | 22 | - | 24047615  | 24047728  | 0.000258152 | 0.123  |
| 440 | MXE | PEA15        | 1  | + | 160176922 | 160177027 | 0.018483252 | 0.151  |
| 441 | MXE | INPP5A       | 10 | + | 134463921 | 134464009 | 0.006924781 | -0.211 |
| 442 | MXE | DCTN2        | 12 | - | 57932035  | 57932130  | 0.028721802 | 0.219  |
| 443 | MXE | DCTN2        | 12 | - | 57932035  | 57932130  | 0.011074151 | 0.199  |
| 444 | MXE | DFNB31       | 9  | - | 117188490 | 117188693 | 3.43E-05    | -0.322 |
| 445 | MXE | KB-1507C5.4  | 8  | + | 104004477 | 104004635 | 1.33E-06    | 0.353  |
| 446 | MXE | THOC1        | 18 | - | 223439    | 223505    | 0           | 0.259  |
| 447 | MXE | THOC1        | 18 | - | 224923    | 224994    | 7.48E-08    | 0.106  |
| 448 | MXE | C1RL-AS1     | 12 | + | 7267725   | 7267815   | 0.013235161 | 0.109  |
| 449 | MXE | TARBP2       | 12 | + | 53897496  | 53897592  | 0.042109089 | 0.205  |
| 450 | MXE | FAM78A       | 9  | - | 134138864 | 134138986 | 0.000397972 | 0.209  |
| 451 | MXE | CROCCP3      | 1  | - | 16812920  | 16813156  | 0.001323403 | -0.187 |
| 452 | MXE | RP11-156P1.3 | 17 | - | 45110643  | 45110747  | 0.007834004 | 0.15   |
| 453 | MXE | NEMF         | 14 | - | 50301080  | 50301167  | 0.001234686 | 0.129  |
| 454 | MXE | SYTL1        | 1  | + | 27677284  | 27677443  | 0.003797193 | 0.14   |
| 455 | MXE | SYTL1        | 1  | + | 27677284  | 27677443  | 0.000196392 | 0.126  |
| 456 | MXE | SNRPN        | 15 | + | 25207260  | 25207356  | 1.95E-08    | -0.108 |
| 457 | MXE | SNRPN        | 15 | + | 25212175  | 25212299  | 0           | 0.192  |
| 458 | MXE | SNRPN        | 15 | + | 25212175  | 25212299  | 0           | 0.283  |
| 459 | MXE | SNRPN        | 15 | + | 25212175  | 25212299  | 0           | 0.275  |
| 460 | MXE | SNRPN        | 15 | + | 25212175  | 25212299  | 0           | 0.262  |
| 461 | MXE | SNRPN        | 15 | + | 25212175  | 25212299  | 0           | 0.302  |
| 462 | MXE | SNRPN        | 15 | + | 25212175  | 25212299  | 0           | 0.318  |
| 463 | MXE | SNRPN        | 15 | + | 25212175  | 25212387  | 0           | 0.153  |

|     |     |          |    |   |           |           |             |        |
|-----|-----|----------|----|---|-----------|-----------|-------------|--------|
| 464 | MXE | SNRPN    | 15 | + | 25213078  | 25213229  | 0           | 0.207  |
| 465 | MXE | SNRPN    | 15 | + | 25213078  | 25213229  | 0           | 0.128  |
| 466 | MXE | SNRPN    | 15 | + | 25219533  | 25219603  | 0           | 0.151  |
| 467 | MXE | ZFX      | X  | + | 24193505  | 24193560  | 0.016058214 | 0.199  |
| 468 | MXE | ATG9A    | 2  | - | 220093155 | 220093207 | 0.003483595 | -0.164 |
| 469 | MXE | LDLRAD4  | 18 | + | 13438242  | 13438383  | 0.001035103 | 0.134  |
| 470 | MXE | LDLRAD4  | 18 | + | 13438242  | 13438383  | 4.86E-05    | 0.153  |
| 471 | MXE | LDLRAD4  | 18 | + | 13438242  | 13438383  | 0.001256238 | 0.134  |
| 472 | MXE | LDLRAD4  | 18 | + | 13438242  | 13438383  | 5.87E-05    | 0.152  |
| 473 | MXE | LDLRAD4  | 18 | + | 13438242  | 13438383  | 0.008801278 | 0.128  |
| 474 | MXE | TRIM16   | 17 | - | 15546034  | 15546130  | 0.000168606 | 0.102  |
| 475 | MXE | TRIM16   | 17 | - | 15554404  | 15555260  | 3.92E-08    | -0.26  |
| 476 | MXE | TRIM16   | 17 | - | 15562115  | 15562190  | 0.040687873 | -0.159 |
| 477 | MXE | BRD9     | 5  | - | 868721    | 869234    | 1.98E-11    | 0.146  |
| 478 | MXE | BRD9     | 5  | - | 868721    | 869234    | 0           | 0.193  |
| 479 | MXE | BRD9     | 5  | - | 869359    | 869509    | 0           | -0.197 |
| 480 | MXE | BRD9     | 5  | - | 869359    | 869509    | 0           | -0.156 |
| 481 | MXE | BRD9     | 5  | - | 869359    | 869509    | 0           | -0.155 |
| 482 | MXE | BRD9     | 5  | - | 870587    | 870690    | 1.79E-06    | 0.109  |
| 483 | MXE | BBS9     | 7  | + | 33397466  | 33397607  | 0.036769417 | 0.127  |
| 484 | MXE | OSER1    | 20 | - | 42835924  | 42835959  | 0.0002299   | 0.126  |
| 485 | MXE | PRPF4B   | 6  | + | 4062446   | 4062533   | 0.001418919 | 0.133  |
| 486 | MXE | PRPF4B   | 6  | + | 4062446   | 4062533   | 0.000629148 | 0.111  |
| 487 | MXE | PCNX     | 14 | + | 71476350  | 71476441  | 0.003763161 | -0.168 |
| 488 | MXE | NAA16    | 13 | + | 41947772  | 41947916  | 9.13E-08    | -0.175 |
| 489 | MXE | NAA16    | 13 | + | 41947903  | 41948016  | 0           | 0.298  |
| 490 | MXE | SERPINA1 | 14 | - | 94854896  | 94855000  | 2.77E-10    | -0.228 |
| 491 | MXE | MAPK10   | 4  | - | 87010358  | 87010430  | 0.000259244 | -0.324 |
| 492 | MXE | MAPK10   | 4  | - | 87010358  | 87010430  | 0.030922296 | -0.117 |
| 493 | MXE | RIN2     | 20 | + | 19915742  | 19915843  | 0           | 0.138  |
| 494 | MXE | FAM65C   | 20 | - | 49211905  | 49212041  | 0.000443168 | -0.119 |



|     |     |          |    |   |           |           |             |        |
|-----|-----|----------|----|---|-----------|-----------|-------------|--------|
| 495 | MXE | MYO15B   | 17 | + | 73587681  | 73587793  | 1.02E-07    | 0.176  |
| 496 | MXE | MYO15B   | 17 | + | 73587696  | 73587793  | 0           | -0.289 |
| 497 | MXE | XAF1     | 17 | + | 6662574   | 6663037   | 2.04E-08    | -0.169 |
| 498 | MXE | ALDH16A1 | 19 | + | 49964875  | 49965057  | 0.048636673 | 0.142  |
| 499 | MXE | SYCP2L   | 6  | + | 10907774  | 10907917  | 0.000584721 | -0.107 |
| 500 | MXE | PAX8     | 2  | - | 113984731 | 113984833 | 0.000108227 | -0.285 |
| 501 | MXE | SEMA4D   | 9  | - | 92020265  | 92020614  | 0.003802406 | 0.115  |
| 502 | MXE | SEMA4D   | 9  | - | 92020265  | 92020614  | 0.000292673 | 0.103  |
| 503 | MXE | NDUFB8   | 10 | - | 102269072 | 102269268 | 5.47E-05    | -0.14  |
| 504 | MXE | NDUFB8   | 10 | - | 102275852 | 102275976 | 0.001502953 | -0.249 |
| 505 | MXE | NDUFB8   | 10 | - | 102275852 | 102275976 | 0.001674279 | -0.166 |
| 506 | MXE | FHIT     | 3  | - | 59737946  | 59738047  | 8.90E-08    | -0.184 |
| 507 | MXE | LST1     | 6  | + | 31555417  | 31555510  | 0.018483204 | -0.157 |
| 508 | MXE | LRRC69   | 8  | + | 92145337  | 92145533  | 0.037289886 | -0.243 |
| 509 | MXE | MAP3K7   | 6  | - | 91271340  | 91271386  | 0           | 0.25   |
| 510 | MXE | SORBS1   | 10 | - | 97106162  | 97106209  | 0.000447377 | -0.191 |
| 511 | MXE | NNMT     | 11 | + | 114133569 | 114133656 | 0.002844931 | 0.161  |
| 512 | MXE | MASP1    | 3  | - | 186980330 | 186980508 | 0           | 0.207  |
| 513 | MXE | PHF7     | 3  | + | 52456237  | 52456354  | 5.86E-07    | -0.347 |
| 514 | MXE | PHF7     | 3  | + | 52456237  | 52456354  | 0.008412648 | -0.104 |
| 515 | MXE | ENGASE   | 17 | + | 77079101  | 77079205  | 0.041061622 | 0.12   |
| 516 | MXE | PRR5     | 22 | + | 45127614  | 45127701  | 0.029362686 | 0.137  |
| 517 | MXE | DDO      | 6  | - | 110725976 | 110726153 | 0.008959582 | -0.335 |
| 518 | MXE | GSN      | 9  | + | 124043747 | 124043840 | 0           | -0.121 |
| 519 | MXE | GSN      | 9  | + | 124043747 | 124043840 | 0           | -0.117 |
| 520 | MXE | GSN      | 9  | + | 124044152 | 124044231 | 0           | -0.13  |
| 521 | MXE | GSN      | 9  | + | 124044152 | 124044231 | 0           | -0.169 |
| 522 | MXE | GSN      | 9  | + | 124044716 | 124044828 | 0           | -0.304 |
| 523 | MXE | GSN      | 9  | + | 124044716 | 124044828 | 0           | -0.365 |
| 524 | MXE | GSN      | 9  | + | 124044716 | 124044828 | 0.000215978 | -0.223 |
| 525 | MXE | GSN      | 9  | + | 124045596 | 124045670 | 0           | -0.214 |

|     |     |               |    |   |           |           |             |        |
|-----|-----|---------------|----|---|-----------|-----------|-------------|--------|
| 526 | MXE | ITPK1         | 14 | - | 93460224  | 93460342  | 0.007618167 | -0.106 |
| 527 | MXE | EGFL7         | 9  | + | 139559143 | 139559237 | 0.000192326 | 0.145  |
| 528 | MXE | RP11-130F10.1 | 4  | + | 178372628 | 178372744 | 0.002163283 | -0.111 |
| 529 | MXE | CEP170        | 1  | - | 243305668 | 243305765 | 2.53E-05    | 0.108  |
| 530 | MXE | SFXN4         | 10 | - | 120919239 | 120919265 | 5.13E-05    | 0.12   |
| 531 | MXE | BCAS3         | 17 | + | 58765380  | 58765556  | 0.012215739 | -0.178 |
| 532 | MXE | METAP1        | 4  | + | 99957104  | 99957162  | 0.026262509 | -0.142 |
| 533 | MXE | MS4A4A        | 11 | + | 60064669  | 60064798  | 1.46E-05    | -0.191 |
| 534 | MXE | ADCY10P1      | 6  | + | 41092223  | 41092559  | 0.004582288 | 0.13   |
| 535 | MXE | SNHG14        | 15 | + | 25332613  | 25332746  | 0.001494782 | 0.125  |
| 536 | MXE | SLC9A5        | 16 | + | 67293722  | 67293849  | 0.021879456 | 0.317  |
| 537 | MXE | EDARADD       | 1  | + | 236590691 | 236590750 | 3.61E-05    | 0.276  |
| 538 | MXE | HSPBP1        | 19 | - | 55777253  | 55777350  | 1.11E-05    | 0.117  |
| 539 | MXE | VEZT          | 12 | + | 95617955  | 95618012  | 0.016796741 | 0.158  |
| 540 | MXE | BCL2L12       | 19 | + | 50170278  | 50170418  | 0           | 0.156  |
| 541 | MXE | OGFOD3        | 17 | - | 80369330  | 80369406  | 0.001141423 | -0.317 |
| 542 | MXE | OGFOD3        | 17 | - | 80369330  | 80369406  | 0.001558758 | -0.307 |
| 543 | MXE | OGFOD3        | 17 | - | 80369330  | 80369406  | 0.001081894 | -0.341 |
| 544 | MXE | IFT122        | 3  | + | 129207099 | 129207240 | 0.003713438 | 0.108  |
| 545 | MXE | STAG3         | 7  | + | 99783822  | 99783919  | 0.02082438  | 0.126  |
| 546 | MXE | LAMB1         | 7  | - | 107599693 | 107599925 | 0.01800766  | 0.105  |
| 547 | MXE | DPH5          | 1  | - | 101460665 | 101460705 | 4.88E-12    | -0.145 |
| 548 | MXE | DPH5          | 1  | - | 101460665 | 101460705 | 0.000721062 | -0.208 |
| 549 | MXE | DPH5          | 1  | - | 101460665 | 101460705 | 0.000645597 | 0.154  |
| 550 | MXE | DPH5          | 1  | - | 101460665 | 101460705 | 0.015558702 | 0.111  |
| 551 | MXE | DPH5          | 1  | - | 101460665 | 101460705 | 0.000317718 | 0.147  |
| 552 | MXE | DPH5          | 1  | - | 101460665 | 101460705 | 2.89E-07    | 0.134  |
| 553 | MXE | DPH5          | 1  | - | 101460665 | 101460705 | 0           | 0.15   |
| 554 | MXE | DPH5          | 1  | - | 101460665 | 101460705 | 0           | 0.343  |
| 555 | MXE | DPH5          | 1  | - | 101467022 | 101467100 | 0           | 0.159  |
| 556 | MXE | DPH5          | 1  | - | 101467022 | 101467143 | 0.001242142 | 0.148  |

|     |     |              |    |   |           |           |             |        |
|-----|-----|--------------|----|---|-----------|-----------|-------------|--------|
| 557 | MXE | DPH5         | 1  | - | 101467022 | 101467143 | 1.12E-08    | 0.193  |
| 558 | MXE | DPH5         | 1  | - | 101467022 | 101467143 | 0.005363532 | 0.136  |
| 559 | MXE | DPH5         | 1  | - | 101467022 | 101467143 | 1.67E-07    | 0.182  |
| 560 | MXE | DPH5         | 1  | - | 101467022 | 101467143 | 0           | 0.15   |
| 561 | MXE | DPH5         | 1  | - | 101487196 | 101487321 | 6.38E-09    | -0.155 |
| 562 | MXE | DPH5         | 1  | - | 101487196 | 101487321 | 0           | -0.142 |
| 563 | MXE | RUNX1        | 21 | - | 36259139  | 36259393  | 0.003347698 | 0.136  |
| 564 | MXE | RUNX1        | 21 | - | 36259139  | 36259393  | 0.003729912 | 0.108  |
| 565 | MXE | AFF3         | 2  | - | 100368682 | 100368763 | 2.23E-06    | -0.148 |
| 566 | MXE | CD47         | 3  | - | 107769424 | 107769449 | 1.00E-06    | -0.162 |
| 567 | MXE | TMEM120B     | 12 | + | 122211326 | 122211419 | 0.038455694 | 0.108  |
| 568 | MXE | GCC2         | 2  | + | 109102966 | 109103104 | 2.17E-07    | -0.122 |
| 569 | MXE | GGCX         | 2  | - | 85783304  | 85783383  | 0.001731066 | -0.104 |
| 570 | MXE | GGCX         | 2  | - | 85783304  | 85783383  | 0.000947075 | -0.113 |
| 571 | MXE | ELOVL5       | 6  | - | 53152659  | 53152740  | 0.022078162 | -0.188 |
| 572 | MXE | BIN1         | 2  | - | 127808729 | 127808819 | 1.29E-05    | 0.163  |
| 573 | MXE | RABGAP1L     | 1  | + | 174846529 | 174846743 | 4.47E-06    | 0.168  |
| 574 | MXE | RABGAP1L     | 1  | + | 174846529 | 174846743 | 0.000384672 | 0.136  |
| 575 | MXE | RP4-717I23.3 | 1  | - | 93802933  | 93803069  | 2.04E-08    | 0.101  |
| 576 | MXE | MTRF1        | 13 | - | 41835826  | 41835961  | 8.98E-06    | 0.119  |
| 577 | MXE | SLC26A6      | 3  | - | 48668656  | 48668739  | 0.010951737 | 0.125  |
| 578 | MXE | CA9          | 9  | + | 35677786  | 35677853  | 3.48E-05    | -0.131 |
| 579 | MXE | NUMA1        | 11 | - | 71760464  | 71760585  | 0.00371415  | 0.104  |
| 580 | MXE | LRRC37A2     | 17 | + | 44597577  | 44597649  | 0.000774123 | 0.122  |
| 581 | MXE | UQCC1        | 20 | - | 33902490  | 33902568  | 0           | 0.27   |
| 582 | MXE | UQCC1        | 20 | - | 33934966  | 33935075  | 0           | 0.179  |
| 583 | MXE | COL4A6       | X  | - | 107408599 | 107408716 | 0.006662725 | -0.123 |
| 584 | MXE | RP4-639F20.1 | 1  | + | 95397427  | 95397541  | 0.003841531 | 0.14   |
| 585 | MXE | PADI4        | 1  | + | 17681027  | 17681182  | 0.009134163 | 0.107  |
| 586 | MXE | ANKRD54      | 22 | - | 38229690  | 38229762  | 0.039886753 | 0.101  |
| 587 | MXE | DSN1         | 20 | - | 35396371  | 35396445  | 0.045581672 | -0.171 |

|     |     |               |    |   |           |           |             |        |
|-----|-----|---------------|----|---|-----------|-----------|-------------|--------|
| 588 | MXE | DSN1          | 20 | - | 35396371  | 35396445  | 0.048593466 | -0.162 |
| 589 | MXE | MDM2          | 12 | + | 69208382  | 69208469  | 2.74E-07    | 0.257  |
| 590 | MXE | MDM2          | 12 | + | 69208382  | 69208469  | 0.025269543 | 0.243  |
| 591 | MXE | POLN          | 4  | - | 2158514   | 2158580   | 0.021211181 | -0.211 |
| 592 | MXE | CTD-2583A14.9 | 19 | - | 58423427  | 58423554  | 0.000785225 | 0.361  |
| 593 | MXE | RNF34         | 12 | + | 121840544 | 121840610 | 0           | -0.134 |
| 594 | MXE | CD44          | 11 | + | 35219667  | 35219793  | 0.000729071 | 0.138  |
| 595 | MXE | CD44          | 11 | + | 35219667  | 35219793  | 2.03E-06    | 0.159  |
| 596 | MXE | CD44          | 11 | + | 35219667  | 35219793  | 3.53E-13    | 0.103  |
| 597 | MXE | CD44          | 11 | + | 35222628  | 35222742  | 0.02541289  | 0.161  |
| 598 | MXE | CD44          | 11 | + | 35222628  | 35222742  | 0.004371253 | 0.205  |
| 599 | MXE | CD44          | 11 | + | 35223217  | 35223334  | 0.046547547 | 0.154  |
| 600 | MXE | UNC5B         | 10 | + | 73048714  | 73048747  | 0.000205638 | 0.154  |
| 601 | MXE | CNOT2         | 12 | + | 70688016  | 70688074  | 0.016604917 | 0.149  |
| 602 | MXE | CNOT2         | 12 | + | 70688016  | 70688074  | 0.028957149 | 0.139  |
| 603 | MXE | ANKRD55       | 5  | - | 55412441  | 55412609  | 4.75E-06    | 0.234  |
| 604 | MXE | FAM184A       | 6  | - | 119281933 | 119282028 | 0.043678096 | -0.128 |
| 605 | MXE | NFYC          | 1  | + | 41188879  | 41188946  | 0.023602375 | 0.153  |
| 606 | MXE | SS18          | 18 | - | 23648457  | 23648521  | 0.000542132 | 0.237  |
| 607 | MXE | SS18          | 18 | - | 23658039  | 23658124  | 0.014445552 | 0.254  |
| 608 | MXE | SS18          | 18 | - | 23658974  | 23659089  | 0.042115985 | -0.116 |
| 609 | MXE | APBB2         | 4  | - | 41102655  | 41102767  | 0.016085768 | -0.171 |
| 610 | MXE | PPIL3         | 2  | - | 201750420 | 201750495 | 0.005862305 | -0.122 |
| 611 | MXE | GSTZ1         | 14 | + | 77791212  | 77791264  | 0.036716786 | -0.114 |
| 612 | MXE | POU2F1        | 1  | + | 167272710 | 167272811 | 2.05E-06    | -0.171 |
| 613 | MXE | TMEM180       | 10 | + | 104228043 | 104228089 | 0.019317042 | -0.264 |
| 614 | MXE | DCUN1D4       | 4  | + | 52757925  | 52758017  | 0.009746334 | -0.152 |
| 615 | MXE | B3GALNT1      | 3  | - | 160807731 | 160807850 | 0.002850233 | -0.16  |
| 616 | MXE | HSD17B7P2     | 10 | + | 38654837  | 38654939  | 5.31E-08    | 0.111  |
| 617 | MXE | SEPSECS       | 4  | - | 25157658  | 25157817  | 2.18E-06    | -0.104 |
| 618 | MXE | TBC1D5        | 3  | - | 17549965  | 17550097  | 0.011064522 | -0.123 |

|     |     |               |    |   |           |           |             |        |
|-----|-----|---------------|----|---|-----------|-----------|-------------|--------|
| 619 | MXE | ZNF10         | 12 | + | 133715784 | 133715835 | 0.00685189  | 0.132  |
| 620 | MXE | GRN           | 17 | + | 42422898  | 42422973  | 0.03277836  | 0.195  |
| 621 | MXE | RP11-222A11.1 | 10 | + | 67332692  | 67332814  | 0.013516713 | -0.107 |
| 622 | MXE | CROCC         | 1  | + | 17275293  | 17275421  | 0.007834621 | -0.148 |
| 623 | MXE | FAM195A       | 16 | + | 692119    | 692249    | 0.04994383  | 0.122  |
| 624 | MXE | AC004158.2    | 16 | - | 72589163  | 72589225  | 4.68E-06    | 0.37   |
| 625 | MXE | AC004158.2    | 16 | - | 72589163  | 72589225  | 0.000114232 | 0.12   |
| 626 | MXE | SEMA3F        | 3  | + | 50212528  | 50212621  | 0.002588581 | 0.117  |
| 627 | MXE | SREBF2        | 22 | + | 42295240  | 42295557  | 5.44E-05    | 0.21   |
| 628 | MXE | GPATCH4       | 1  | - | 156568018 | 156568111 | 0.02205309  | -0.14  |
| 629 | MXE | ADAM15        | 1  | + | 155034051 | 155034122 | 4.48E-08    | 0.107  |
| 630 | MXE | MOK           | 14 | - | 102732159 | 102732249 | 0.002772691 | 0.346  |
| 631 | MXE | MOK           | 14 | - | 102732159 | 102732249 | 0.000871149 | 0.259  |
| 632 | MXE | MEIS2         | 15 | - | 37187351  | 37187441  | 0.005825423 | 0.103  |
| 633 | MXE | LIN9          | 1  | - | 226485419 | 226485514 | 0.013235161 | -0.106 |
| 634 | MXE | SLC25A35      | 17 | - | 8193171   | 8193302   | 0.029479994 | -0.108 |
| 635 | MXE | TMEM63C       | 14 | + | 77679788  | 77679851  | 3.02E-06    | -0.284 |
| 636 | MXE | PLEKHA4       | 19 | - | 49360678  | 49360753  | 0.041591676 | -0.195 |
| 637 | MXE | OGT           | X  | + | 70767756  | 70767873  | 0.009177897 | 0.13   |
| 638 | MXE | OGT           | X  | + | 70767756  | 70767873  | 0.001868679 | 0.139  |
| 639 | MXE | NINL          | 20 | - | 25477298  | 25477439  | 0.018136899 | -0.203 |
| 640 | MXE | ZNF561        | 19 | - | 9724696   | 9724779   | 0           | 0.2    |
| 641 | MXE | TMEM116       | 12 | - | 112403398 | 112403563 | 0.027215607 | 0.228  |
| 642 | MXE | RP11-420A23.1 | 14 | + | 129224116 | 129224190 | 0.000145664 | -0.191 |
| 643 | MXE | CIITA         | 16 | + | 11016263  | 11016347  | 0.013410441 | -0.145 |
| 644 | MXE | ALPK2         | 18 | - | 56196322  | 56196470  | 0.043438859 | -0.128 |
| 645 | MXE | ALPK2         | 18 | - | 56202065  | 56205456  | 5.75E-07    | 0.132  |
| 646 | MXE | MDM1          | 12 | - | 68715126  | 68715226  | 4.52E-10    | -0.122 |
| 647 | MXE | MDM1          | 12 | - | 68715126  | 68715226  | 1.72E-10    | 0.104  |
| 648 | MXE | HHAT          | 1  | + | 210686496 | 210686532 | 0.001239705 | 0.125  |
| 649 | MXE | ZNF721        | 4  | - | 429558    | 429668    | 0.015077048 | 0.164  |

|     |     |            |    |   |           |           |             |        |
|-----|-----|------------|----|---|-----------|-----------|-------------|--------|
| 650 | MXE | CREM       | 10 | + | 35468061  | 35468204  | 3.61E-08    | 0.108  |
| 651 | MXE | CREM       | 10 | + | 35477127  | 35477316  | 0.040971069 | 0.144  |
| 652 | MXE | AGBL3      | 7  | + | 134674000 | 134674061 | 0.009942607 | -0.173 |
| 653 | MXE | EPG5       | 18 | - | 43460039  | 43460188  | 0.037530068 | 0.106  |
| 654 | MXE | LMO2       | 11 | - | 33886147  | 33886363  | 0           | 0.12   |
| 655 | MXE | LMO2       | 11 | - | 33890891  | 33891132  | 2.18E-05    | 0.184  |
| 656 | MXE | TAF1D      | 11 | - | 93464315  | 93464382  | 1.01E-06    | -0.107 |
| 657 | MXE | TAF1D      | 11 | - | 93464315  | 93464382  | 0.001234686 | -0.128 |
| 658 | MXE | GLUD1      | 10 | - | 88851327  | 88851380  | 0.017601676 | 0.143  |
| 659 | MXE | OSBPL9     | 1  | + | 52221991  | 52222030  | 6.27E-12    | -0.139 |
| 660 | MXE | ZNF562     | 19 | - | 9770054   | 9770143   | 6.06E-07    | -0.198 |
| 661 | MXE | SLC25A13   | 7  | - | 95906507  | 95906650  | 0.017595318 | -0.108 |
| 662 | MXE | SEPT7P2    | 7  | - | 45763951  | 45765314  | 0.003430332 | 0.138  |
| 663 | MXE | TANGO2     | 22 | + | 20040882  | 20041074  | 0.001234686 | 0.151  |
| 664 | MXE | TANGO2     | 22 | + | 20040959  | 20041074  | 0.006346048 | 0.102  |
| 665 | MXE | NASP       | 1  | + | 46060365  | 46060445  | 1.35E-11    | -0.125 |
| 666 | MXE | TPP2       | 13 | + | 103298643 | 103298740 | 0           | -0.125 |
| 667 | MXE | CAMTA2     | 17 | - | 4884972   | 4885037   | 0           | 0.133  |
| 668 | MXE | CAMTA2     | 17 | - | 4884972   | 4885126   | 0           | 0.128  |
| 669 | MXE | WDR27      | 6  | - | 170068077 | 170068281 | 0.013723386 | 0.108  |
| 670 | MXE | SUN1       | 7  | + | 888054    | 888252    | 0.000386374 | 0.112  |
| 671 | MXE | SUN1       | 7  | + | 889156    | 889240    | 5.02E-05    | 0.456  |
| 672 | MXE | TPM2       | 9  | - | 35684728  | 35684804  | 3.12E-05    | 0.176  |
| 673 | MXE | TSPAN14    | 10 | + | 82248972  | 82249070  | 1.24E-07    | -0.154 |
| 674 | RI  | AC084018.1 | 12 | - | 122233172 | 122234148 | 2.10E-05    | -0.184 |
| 675 | RI  | EP400NL    | 12 | + | 132588541 | 132589849 | 0.029680612 | -0.235 |
| 676 | RI  | TECR       | 19 | + | 14674469  | 14674715  | 0.007952907 | 0.211  |
| 677 | RI  | FBXL6      | 8  | - | 145579959 | 145580373 | 0.018908039 | -0.109 |
| 678 | RI  | FBXL6      | 8  | - | 145580649 | 145581162 | 6.70E-13    | -0.149 |
| 679 | RI  | AP5Z1      | 7  | + | 4829462   | 4830222   | 1.41E-10    | -0.293 |
| 680 | RI  | DZIP3      | 3  | + | 108366789 | 108367809 | 6.91E-12    | 0.235  |

|     |    |             |    |   |           |           |             |        |
|-----|----|-------------|----|---|-----------|-----------|-------------|--------|
| 681 | RI | PCYT1A      | 3  | - | 195974237 | 195975194 | 6.30E-08    | -0.254 |
| 682 | RI | OXA1L       | 14 | + | 23239401  | 23239834  | 0           | 0.199  |
| 683 | RI | CCDC78      | 16 | - | 772921    | 773936    | 0.021331035 | 0.302  |
| 684 | RI | QTRT1       | 19 | + | 10822836  | 10823304  | 1.55E-13    | -0.111 |
| 685 | RI | TRIM69      | 15 | + | 45048565  | 45051052  | 0.006493659 | 0.331  |
| 686 | RI | HERC2P9     | 15 | + | 28881632  | 28882253  | 4.07E-10    | 0.401  |
| 687 | RI | HERC2P9     | 15 | + | 28886067  | 28886458  | 9.93E-05    | 0.209  |
| 688 | RI | HERC2P9     | 15 | + | 28900418  | 28900837  | 1.78E-07    | 0.278  |
| 689 | RI | PLCB2       | 15 | - | 40583465  | 40584125  | 0.000143242 | -0.153 |
| 690 | RI | MYH7B       | 20 | + | 33589750  | 33590240  | 0.002694136 | 0.146  |
| 691 | RI | VARS2       | 6  | + | 30881981  | 30882814  | 3.23E-05    | 0.222  |
| 692 | RI | NME3        | 16 | - | 1820881   | 1821411   | 0.000648263 | -0.143 |
| 693 | RI | B4GALT3     | 1  | - | 161146223 | 161146896 | 0.001751587 | -0.185 |
| 694 | RI | C1R         | 12 | - | 7244047   | 7245037   | 2.56E-11    | -0.168 |
| 695 | RI | TRIM66      | 11 | - | 8645905   | 8646775   | 0.003598308 | -0.122 |
| 696 | RI | MAP3K14-AS1 | 17 | + | 43344479  | 43344857  | 0.045524331 | -0.208 |
| 697 | RI | HAX1        | 1  | + | 154245811 | 154246437 | 0           | -0.375 |
| 698 | RI | RASAL3      | 19 | - | 15568102  | 15569237  | 0.000129519 | -0.113 |
| 699 | RI | ARSA        | 22 | - | 51065018  | 51065834  | 0.006511394 | -0.115 |
| 700 | RI | C19orf66    | 19 | + | 10201925  | 10202306  | 0.002247704 | -0.264 |
| 701 | RI | CALB1       | 8  | - | 91072856  | 91075381  | 1.39E-10    | -0.484 |
| 702 | RI | NICN1       | 3  | - | 49462381  | 49462871  | 0           | -0.152 |
| 703 | RI | HLA-DMA     | 6  | - | 32917387  | 32918580  | 8.86E-07    | -0.12  |
| 704 | RI | ADM         | 11 | + | 10327226  | 10327645  | 7.06E-07    | -0.233 |
| 705 | RI | FANK1       | 10 | + | 127697790 | 127698161 | 0.001820186 | 0.283  |
| 706 | RI | NT5C3B      | 17 | - | 39991839  | 39992209  | 1.09E-05    | -0.275 |
| 707 | RI | DDX52       | 17 | - | 35979812  | 35981322  | 8.46E-06    | -0.287 |
| 708 | RI | EDC4        | 16 | + | 67915570  | 67916012  | 0.002226428 | -0.121 |
| 709 | RI | ADAM32      | 8  | + | 39022548  | 39027516  | 4.52E-07    | -0.39  |
| 710 | RI | WDR73       | 15 | - | 85189203  | 85189579  | 0.005696765 | 0.115  |
| 711 | RI | TRMT6       | 20 | - | 5921698   | 5922682   | 0.007103751 | 0.101  |

|     |    |              |    |   |           |           |             |        |
|-----|----|--------------|----|---|-----------|-----------|-------------|--------|
| 712 | RI | IZUMO4       | 19 | + | 2098434   | 2098803   | 0.017336908 | -0.199 |
| 713 | RI | TMEM91       | 19 | + | 41888676  | 41889988  | 0           | -0.338 |
| 714 | RI | CCDC24       | 1  | + | 44457518  | 44458059  | 0.001362052 | 0.309  |
| 715 | RI | AMT          | 3  | - | 49454210  | 49455151  | 0           | -0.283 |
| 716 | RI | PPIE         | 1  | + | 40207566  | 40208969  | 0.001150187 | 0.206  |
| 717 | RI | PGAP3        | 17 | - | 37829766  | 37830307  | 0.006511394 | -0.101 |
| 718 | RI | BRF1         | 14 | - | 105685487 | 105686467 | 3.84E-05    | -0.236 |
| 719 | RI | MAN2A2       | 15 | + | 91455272  | 91455894  | 1.09E-09    | -0.129 |
| 720 | RI | PPOX         | 1  | + | 161136889 | 161137276 | 0           | -0.512 |
| 721 | RI | TTC12        | 11 | + | 113186672 | 113187037 | 1.02E-06    | -0.274 |
| 722 | RI | CDK20        | 9  | - | 90584108  | 90585812  | 0.045395443 | 0.125  |
| 723 | RI | MIR3654      | 11 | - | 62340055  | 62342380  | 0.04795471  | -0.114 |
| 724 | RI | IQSEC2       | X  | - | 53295510  | 53296246  | 1.78E-07    | 0.139  |
| 725 | RI | 6-Mar        | 5  | + | 10400895  | 10402251  | 2.61E-07    | -0.118 |
| 726 | RI | RABGGTB      | 1  | + | 76255636  | 76255959  | 1.27E-10    | 0.105  |
| 727 | RI | RASGRP4      | 19 | - | 38910499  | 38910902  | 7.84E-11    | -0.109 |
| 728 | RI | ECHDC2       | 1  | - | 53370705  | 53372283  | 0.004346019 | -0.181 |
| 729 | RI | DYNC1LI1     | 3  | - | 32571775  | 32574589  | 0.009336491 | 0.117  |
| 730 | RI | DDX26B       | X  | + | 134703261 | 134706958 | 0.000719075 | -0.15  |
| 731 | RI | NPAS2        | 2  | + | 101598692 | 101604738 | 0.00085883  | -0.101 |
| 732 | RI | GNB3         | 12 | + | 6950421   | 6950788   | 0.000228359 | -0.157 |
| 733 | RI | CPNE1        | 20 | - | 34220084  | 34220307  | 1.02E-05    | -0.145 |
| 734 | RI | GADD45B      | 19 | + | 2476353   | 2476628   | 1.08E-06    | 0.119  |
| 735 | RI | ZNF311       | 6  | - | 28967263  | 28967824  | 0.000405757 | -0.372 |
| 736 | RI | CFH          | 1  | + | 196709748 | 196711181 | 7.62E-13    | 0.147  |
| 737 | RI | RP11-1407O15 | 17 | - | 36361696  | 36365176  | 4.92E-07    | -0.238 |
| 738 | RI | ABTB1        | 3  | + | 127396307 | 127396686 | 2.04E-12    | -0.135 |
| 739 | RI | PSME2        | 14 | - | 24614918  | 24615449  | 0           | -0.262 |
| 740 | RI | SYTL1        | 1  | + | 27675888  | 27676256  | 0.001607671 | -0.125 |
| 741 | RI | CDK18        | 1  | + | 205492274 | 205492753 | 1.06E-07    | -0.171 |
| 742 | RI | C9orf89      | 9  | + | 95872849  | 95874571  | 0.019891129 | -0.113 |



|     |    |          |    |   |           |           |             |        |
|-----|----|----------|----|---|-----------|-----------|-------------|--------|
| 743 | RI | ZNF160   | 19 | - | 53594665  | 53594973  | 0.015290608 | -0.197 |
| 744 | RI | IRF9     | 14 | + | 24633271  | 24634164  | 3.02E-08    | -0.145 |
| 745 | RI | MFAP4    | 17 | - | 19288411  | 19288767  | 0.007046082 | -0.353 |
| 746 | RI | HPN      | 19 | + | 35532625  | 35533426  | 1.14E-07    | -0.24  |
| 747 | RI | TMEM218  | 11 | - | 124972027 | 124972705 | 0           | -0.444 |
| 748 | RI | TMEM218  | 11 | - | 124972027 | 124972705 | 0.001618249 | 0.122  |
| 749 | RI | TMEM218  | 11 | - | 124972027 | 124972705 | 0           | -0.312 |
| 750 | RI | MYO15A   | 17 | + | 18062588  | 18063331  | 0.014570588 | -0.437 |
| 751 | RI | CCDC57   | 17 | - | 80151631  | 80152015  | 0.010531239 | 0.139  |
| 752 | RI | SGSM3    | 22 | + | 40804936  | 40805376  | 0.001474432 | -0.111 |
| 753 | RI | ZNF598   | 16 | - | 2052521   | 2053729   | 0.003119083 | -0.322 |
| 754 | RI | RBM25    | 14 | + | 73566374  | 73570186  | 0.035916195 | -0.112 |
| 755 | RI | CDK5RAP3 | 17 | + | 46050884  | 46051397  | 0.008143804 | 0.119  |
| 756 | RI | CDK5RAP3 | 17 | + | 46051765  | 46052703  | 0           | -0.127 |
| 757 | RI | DUS1L    | 17 | - | 80019084  | 80019597  | 1.36E-06    | 0.124  |
| 758 | RI | MXRA8    | 1  | - | 1289572   | 1289889   | 0.000533941 | -0.257 |
| 759 | RI | TCIRG1   | 11 | + | 67810412  | 67810964  | 1.62E-13    | -0.273 |
| 760 | RI | SYNM     | 15 | + | 99669571  | 99675770  | 0.000121875 | -0.104 |
| 761 | RI | RPRD1A   | 18 | - | 33605560  | 33607038  | 0           | -0.822 |
| 762 | RI | TNFRSF25 | 1  | - | 6522922   | 6523187   | 3.80E-06    | -0.518 |
| 763 | RI | EFHC1    | 6  | + | 52317485  | 52319085  | 3.11E-05    | -0.205 |
| 764 | RI | STEAP2   | 7  | + | 89861650  | 89866945  | 5.53E-06    | -0.243 |
| 765 | RI | MFSD10   | 4  | - | 2934326   | 2934936   | 7.21E-13    | -0.115 |
| 766 | RI | TMEM107  | 17 | - | 8079074   | 8079344   | 3.37E-05    | -0.25  |
| 767 | RI | TJAP1    | 6  | + | 43470325  | 43471246  | 4.51E-05    | 0.237  |
| 768 | RI | CD46     | 1  | + | 207940357 | 207943707 | 0.00377896  | -0.171 |
| 769 | RI | USP34    | 2  | - | 61463160  | 61463524  | 0.000107012 | -0.106 |
| 770 | RI | PSMB9    | 6  | + | 32823914  | 32825911  | 3.20E-05    | 0.321  |
| 771 | RI | PIDD     | 11 | - | 800761    | 801120    | 0.013152225 | -0.101 |
| 772 | RI | PRRG2    | 19 | + | 50086463  | 50086974  | 4.13E-05    | 0.298  |
| 773 | RI | APBB3    | 5  | - | 139941171 | 139941434 | 0           | -0.655 |

|     |    |              |    |   |           |           |             |        |
|-----|----|--------------|----|---|-----------|-----------|-------------|--------|
| 774 | RI | APBB3        | 5  | - | 139941171 | 139941812 | 0           | -0.278 |
| 775 | RI | MINK1        | 17 | + | 4792941   | 4794030   | 0.004565796 | -0.163 |
| 776 | RI | NKTR         | 3  | + | 42661155  | 42663008  | 0.006203421 | -0.157 |
| 777 | RI | RPS7         | 2  | + | 3622914   | 3623274   | 0           | -0.197 |
| 778 | RI | YPEL4        | 11 | - | 57413769  | 57414267  | 0.004681061 | 0.158  |
| 779 | RI | HSH2D        | 19 | + | 16263361  | 16264018  | 3.51E-07    | 0.148  |
| 780 | RI | NELFE        | 6  | - | 31922331  | 31922873  | 1.37E-05    | 0.131  |
| 781 | RI | CDCA3        | 12 | - | 6958486   | 6959022   | 6.29E-08    | 0.213  |
| 782 | RI | STAG3        | 7  | + | 99786075  | 99786639  | 4.01E-06    | -0.28  |
| 783 | RI | C11orf49     | 11 | + | 47182677  | 47183798  | 4.76E-06    | -0.299 |
| 784 | RI | ATXN2L       | 16 | + | 28847253  | 28848558  | 3.26E-10    | -0.117 |
| 785 | RI | JMJD7-PLA2G4 | 15 | + | 42126937  | 42127421  | 5.30E-06    | -0.159 |
| 786 | RI | GORASP1      | 3  | - | 39141795  | 39142368  | 3.64E-11    | -0.209 |
| 787 | RI | AMBRA1       | 11 | - | 46563494  | 46564948  | 6.17E-06    | 0.147  |
| 788 | RI | HAGHL        | 16 | + | 778793    | 779715    | 1.13E-05    | -0.188 |
| 789 | RI | HAGHL        | 16 | + | 779008    | 779715    | 0.005881555 | -0.155 |
| 790 | RI | NR2C1        | 12 | - | 95451506  | 95452265  | 0.000968845 | -0.107 |
| 791 | RI | PRDM5        | 4  | - | 121737607 | 121738079 | 4.93E-07    | -0.227 |
| 792 | RI | NLRC5        | 16 | + | 57061983  | 57062297  | 0.00150416  | 0.214  |
| 793 | RI | MAPK12       | 22 | - | 50694043  | 50694628  | 0.0014364   | -0.123 |
| 794 | RI | TMEM175      | 4  | + | 941903    | 942403    | 0.023901385 | -0.186 |
| 795 | RI | LSR          | 19 | + | 35757581  | 35757870  | 0.007975998 | -0.241 |
| 796 | RI | LSR          | 19 | + | 35757581  | 35757870  | 0.010513023 | -0.231 |
| 797 | RI | P2RX6        | 22 | + | 21380708  | 21382296  | 0.008387582 | -0.2   |
| 798 | RI | SHMT2        | 12 | + | 57625993  | 57626358  | 0.000357563 | -0.155 |
| 799 | RI | ZSWIM8       | 10 | + | 75553904  | 75554397  | 1.22E-09    | -0.109 |
| 800 | RI | IFFO1        | 12 | - | 6657230   | 6657711   | 0.001426857 | -0.119 |
| 801 | RI | PCNXL2       | 1  | - | 233119881 | 233122286 | 0.012677069 | 0.175  |
| 802 | RI | ULK3         | 15 | - | 75134620  | 75135017  | 1.08E-06    | -0.186 |
| 803 | RI | ULK3         | 15 | - | 75134620  | 75135017  | 8.15E-05    | -0.183 |
| 804 | RI | AP1G2        | 14 | - | 24031170  | 24031624  | 0           | -0.13  |

|     |    |          |    |   |           |           |             |        |
|-----|----|----------|----|---|-----------|-----------|-------------|--------|
| 805 | RI | P2RX7    | 12 | + | 121614949 | 121615249 | 5.63E-09    | -0.152 |
| 806 | RI | PTBP1    | 19 | + | 804291    | 804702    | 4.51E-05    | 0.127  |
| 807 | RI | CFB      | 6  | + | 31915721  | 31916289  | 0.000304835 | -0.254 |
| 808 | RI | ICAM3    | 19 | - | 10445741  | 10446652  | 0.003784879 | 0.134  |
| 809 | RI | ICAM3    | 19 | - | 10449357  | 10449921  | 0.006392817 | 0.153  |
| 810 | RI | SLCO1A2  | 12 | - | 21446878  | 21448726  | 0.003682099 | -0.256 |
| 811 | RI | PHLDB1   | 11 | + | 118514789 | 118515409 | 0.00575517  | -0.118 |
| 812 | RI | ORMDL1   | 2  | - | 190647147 | 190647849 | 5.60E-07    | -0.132 |
| 813 | RI | PTGES2   | 9  | - | 130884640 | 130885413 | 0.00027565  | -0.122 |
| 814 | RI | ERCC3    | 2  | - | 128046912 | 128047400 | 0           | -0.329 |
| 815 | RI | GPATCH4  | 1  | - | 156565872 | 156566270 | 0.023159579 | -0.119 |
| 816 | RI | COASY    | 17 | + | 40714168  | 40714505  | 0           | -0.553 |
| 817 | RI | PPP4R1L  | 20 | - | 56820838  | 56822562  | 0.012770081 | -0.112 |
| 818 | RI | MOK      | 14 | - | 102698871 | 102700126 | 0.001858603 | -0.136 |
| 819 | RI | DNHD1    | 11 | + | 6518814   | 6520191   | 0.0014364   | 0.151  |
| 820 | RI | DNHD1    | 11 | + | 6577912   | 6579923   | 0.008904523 | 0.21   |
| 821 | RI | DNHD1    | 11 | + | 6591238   | 6591626   | 0.032702201 | 0.254  |
| 822 | RI | FANCI    | 15 | + | 89824995  | 89826481  | 0           | -0.128 |
| 823 | RI | MAP3K12  | 12 | - | 53880730  | 53881212  | 0.001843451 | -0.269 |
| 824 | RI | HCG18    | 6  | - | 30258782  | 30262741  | 0           | -0.153 |
| 825 | RI | IRF5     | 7  | + | 128587076 | 128587589 | 0.022034164 | -0.112 |
| 826 | RI | SNX32    | 11 | + | 65617390  | 65617742  | 1.97E-07    | 0.339  |
| 827 | RI | ACCS     | 11 | + | 44099394  | 44100334  | 0.000142449 | -0.124 |
| 828 | RI | CIITA    | 16 | + | 11000355  | 11003044  | 0.000312306 | 0.259  |
| 829 | RI | RFNG     | 17 | - | 80007552  | 80007882  | 1.01E-13    | -0.171 |
| 830 | RI | RFNG     | 17 | - | 80007552  | 80008431  | 6.54E-06    | -0.189 |
| 831 | RI | LEPREL2  | 12 | + | 6942755   | 6943213   | 3.24E-08    | 0.328  |
| 832 | RI | SLC27A1  | 19 | + | 17597371  | 17598144  | 0.000922966 | -0.114 |
| 833 | RI | TMEM234  | 1  | - | 32680736  | 32681396  | 0.000206301 | -0.267 |
| 834 | RI | AHSA2    | 2  | + | 61412636  | 61413632  | 1.18E-09    | -0.182 |
| 835 | RI | A1BG-AS1 | 19 | + | 58865079  | 58866549  | 0.015072202 | 0.111  |

|     |    |            |    |   |           |           |             |        |
|-----|----|------------|----|---|-----------|-----------|-------------|--------|
| 836 | RI | ACP5       | 19 | - | 11688407  | 11689009  | 1.09E-06    | 0.225  |
| 837 | RI | MX1        | 21 | + | 42793764  | 42794022  | 0.00576184  | -0.262 |
| 838 | RI | NID2       | 14 | - | 52472454  | 52473378  | 0           | -0.109 |
| 839 | RI | PPM1F      | 22 | - | 22279248  | 22280035  | 0.001618249 | -0.229 |
| 840 | RI | RSRC2      | 12 | - | 123003385 | 123005975 | 8.86E-06    | -0.118 |
| 841 | RI | SKIV2L     | 6  | + | 31928817  | 31929452  | 0.01367309  | -0.111 |
| 842 | RI | AFTPH      | 2  | + | 64806619  | 64808407  | 7.37E-05    | -0.185 |
| 843 | RI | CC2D1B     | 1  | - | 52823452  | 52824133  | 0.007291657 | -0.108 |
| 844 | RI | ZC3H14     | 14 | + | 89034201  | 89034497  | 0.000936542 | -0.107 |
| 845 | RI | CUTA       | 6  | - | 33384873  | 33385087  | 0.009754026 | -0.14  |
| 846 | RI | C7orf63    | 7  | + | 89929180  | 89934134  | 0.002030697 | 0.408  |
| 847 | SE | MADD       | 11 | + | 47314093  | 47314147  | 0.016582748 | -0.164 |
| 848 | SE | RAPH1      | 2  | - | 204341798 | 204341879 | 0.002436989 | -0.164 |
| 849 | SE | AC084018.1 | 12 | - | 122240536 | 122240712 | 8.58E-09    | -0.108 |
| 850 | SE | SLC2A11    | 22 | + | 24209921  | 24210086  | 0           | 0.226  |
| 851 | SE | SLC2A11    | 22 | + | 24224645  | 24224833  | 0.023549614 | -0.142 |
| 852 | SE | SLC2A11    | 22 | + | 24224681  | 24224833  | 0.013355821 | -0.153 |
| 853 | SE | WDR62      | 19 | + | 36562457  | 36562618  | 1.13E-13    | -0.179 |
| 854 | SE | HLCS       | 21 | - | 38318308  | 38318454  | 0.001375266 | -0.248 |
| 855 | SE | ISCU       | 12 | + | 108957835 | 108957931 | 1.13E-13    | -0.114 |
| 856 | SE | ISCU       | 12 | + | 108961695 | 108961792 | 0.001328551 | -0.179 |
| 857 | SE | TEX15      | 8  | - | 30732452  | 30732618  | 9.30E-09    | -0.234 |
| 858 | SE | FBXL6      | 8  | - | 145581116 | 145581162 | 0.000798604 | 0.118  |
| 859 | SE | C19orf82   | 19 | + | 9737459   | 9737536   | 0.043240992 | -0.105 |
| 860 | SE | YTHDF3     | 8  | + | 64087895  | 64087975  | 0.044079415 | 0.115  |
| 861 | SE | RBM26-AS1  | 13 | + | 79991969  | 79992051  | 0.000836394 | 0.131  |
| 862 | SE | RALGAPA1   | 14 | - | 36017713  | 36017744  | 5.50E-09    | -0.228 |
| 863 | SE | TMEM214    | 2  | + | 27260657  | 27260760  | 0           | 0.192  |
| 864 | SE | TMEM214    | 2  | + | 27260682  | 27260760  | 0           | 0.457  |
| 865 | SE | TMEM214    | 2  | + | 27260682  | 27260760  | 0.01354739  | 0.178  |
| 866 | SE | IL9R       | X  | + | 155233341 | 155233520 | 0.02325258  | -0.229 |

|     |    |              |    |   |           |           |             |        |
|-----|----|--------------|----|---|-----------|-----------|-------------|--------|
| 867 | SE | MUTYH        | 1  | - | 45804178  | 45804328  | 0.003192757 | 0.287  |
| 868 | SE | RAD52        | 12 | - | 1045972   | 1046048   | 0.001616415 | -0.191 |
| 869 | SE | CCT6B        | 17 | - | 33285578  | 33285713  | 0.002511621 | 0.145  |
| 870 | SE | ZNF44        | 19 | - | 12404046  | 12404190  | 0.026074493 | -0.187 |
| 871 | SE | PDLIM2       | 8  | + | 22446810  | 22446887  | 1.49E-08    | 0.222  |
| 872 | SE | POMT1        | 9  | + | 134385289 | 134385449 | 0.000468219 | -0.16  |
| 873 | SE | MDM4         | 1  | + | 204506557 | 204506625 | 0           | -0.247 |
| 874 | SE | MDM4         | 1  | + | 204506586 | 204506625 | 0           | -0.331 |
| 875 | SE | DST          | 6  | - | 56333779  | 56333797  | 0.000105517 | -0.259 |
| 876 | SE | RFX8         | 2  | - | 102018897 | 102019214 | 0.046397396 | -0.137 |
| 877 | SE | AC093415.2   | 3  | - | 37892914  | 37892983  | 1.22E-12    | 0.302  |
| 878 | SE | DCAF16       | 4  | - | 17806729  | 17806848  | 0           | -0.28  |
| 879 | SE | RNF24        | 20 | - | 3954978   | 3955047   | 0.004105231 | 0.132  |
| 880 | SE | TMCC1        | 3  | - | 129585852 | 129585941 | 0.049399625 | -0.114 |
| 881 | SE | ATP2A1       | 16 | + | 28903635  | 28903980  | 0.021773292 | -0.115 |
| 882 | SE | PMS2P3       | 7  | - | 75141632  | 75141747  | 0.006138127 | 0.101  |
| 883 | SE | IFT88        | 13 | + | 21163949  | 21164006  | 8.76E-09    | -0.182 |
| 884 | SE | PLCB4        | 20 | + | 9076933   | 9076989   | 0.002934849 | 0.242  |
| 885 | SE | SPP1         | 4  | + | 88898813  | 88899002  | 0.02590134  | 0.119  |
| 886 | SE | SPP1         | 4  | + | 88898813  | 88899011  | 0.023535886 | 0.12   |
| 887 | SE | FAM208B      | 10 | + | 5754356   | 5754502   | 0.035550696 | -0.167 |
| 888 | SE | FAM208B      | 10 | + | 5759621   | 5759713   | 1.04E-05    | -0.116 |
| 889 | SE | CLK1         | 2  | - | 201724847 | 201724938 | 0.016667092 | 0.12   |
| 890 | SE | UBE2V1       | 20 | - | 48713019  | 48713071  | 0.001249118 | 0.168  |
| 891 | SE | PARD3        | 10 | - | 34661425  | 34661464  | 4.02E-06    | 0.125  |
| 892 | SE | DNAJC5       | 20 | + | 62562461  | 62562535  | 5.10E-05    | 0.102  |
| 893 | SE | MKRN1        | 7  | - | 140173574 | 140173627 | 0.008076192 | -0.114 |
| 894 | SE | NDUFAF7      | 2  | + | 37469777  | 37469836  | 0.001790794 | -0.204 |
| 895 | SE | IQCJ-SCHIP1  | 3  | + | 159606608 | 159606732 | 0.03091184  | 0.117  |
| 896 | SE | INMT-FAM188B | 7  | + | 30891831  | 30891895  | 3.06E-07    | -0.116 |
| 897 | SE | PFKFB4       | 3  | - | 48585964  | 48586092  | 0.016332062 | -0.237 |

|     |    |             |    |   |           |           |             |        |
|-----|----|-------------|----|---|-----------|-----------|-------------|--------|
| 898 | SE | NAV1        | 1  | + | 201617761 | 201618553 | 0.002399389 | 0.132  |
| 899 | SE | KB-1572G7.3 | 22 | - | 23974974  | 23975097  | 0.004833676 | 0.155  |
| 900 | SE | TPM1        | 15 | + | 63353396  | 63353472  | 0           | -0.167 |
| 901 | SE | RPP14       | 3  | + | 58296016  | 58296133  | 0.000376841 | 0.135  |
| 902 | SE | ASIC4       | 2  | + | 220396479 | 220396624 | 5.22E-05    | 0.211  |
| 903 | SE | TPT1-AS1    | 13 | + | 45964848  | 45965037  | 0.017929692 | -0.105 |
| 904 | SE | TPT1-AS1    | 13 | + | 45964892  | 45965037  | 0.006123363 | -0.126 |
| 905 | SE | NHP2L1      | 22 | - | 42078359  | 42078591  | 0.027630371 | 0.111  |
| 906 | SE | LRP8        | 1  | - | 53746258  | 53746387  | 0.01795609  | 0.113  |
| 907 | SE | ZNF445      | 3  | - | 44492805  | 44492974  | 0.002692291 | -0.166 |
| 908 | SE | NFATC2IP    | 16 | + | 28967298  | 28967379  | 0.017253033 | -0.108 |
| 909 | SE | LINC01021   | 5  | + | 27476175  | 27476265  | 0           | 0.466  |
| 910 | SE | LINC01021   | 5  | + | 27476175  | 27476265  | 6.24E-07    | 0.395  |
| 911 | SE | PDCD2L      | 19 | + | 34895553  | 34895720  | 4.33E-07    | -0.473 |
| 912 | SE | PIEZO2      | 18 | - | 10682100  | 10682289  | 0.017874166 | -0.12  |
| 913 | SE | PIEZO2      | 18 | - | 10762919  | 10763096  | 0.000147537 | -0.106 |
| 914 | SE | KATNAL2     | 18 | + | 44572761  | 44572898  | 6.52E-09    | 0.262  |
| 915 | SE | EXOSC9      | 4  | + | 122737298 | 122737349 | 0.035508886 | -0.136 |
| 916 | SE | GPX2        | 14 | - | 65408034  | 65408239  | 0.002235512 | -0.427 |
| 917 | SE | TMEM126A    | 11 | + | 85361355  | 85361385  | 0.02760949  | -0.223 |
| 918 | SE | ZNF195      | 11 | - | 3382972   | 3383119   | 3.54E-06    | -0.134 |
| 919 | SE | TP53TG1     | 7  | - | 86974358  | 86974549  | 0.002748372 | 0.13   |
| 920 | SE | NUP214      | 9  | + | 134064439 | 134064518 | 0.001891679 | 0.173  |
| 921 | SE | NUP214      | 9  | + | 134067594 | 134067679 | 6.36E-08    | -0.111 |
| 922 | SE | NUP214      | 9  | + | 134070619 | 134070681 | 4.06E-08    | -0.119 |
| 923 | SE | PALM        | 19 | + | 740351    | 740483    | 0.03034689  | -0.22  |
| 924 | SE | IQCH        | 15 | + | 67636400  | 67636529  | 0.000482819 | 0.264  |
| 925 | SE | GMPR2       | 14 | + | 24703312  | 24703447  | 0.020086262 | -0.138 |
| 926 | SE | KEL         | 7  | - | 142658446 | 142658588 | 0           | -0.151 |
| 927 | SE | NEDD4L      | 18 | + | 56008909  | 56009029  | 0.000692217 | -0.17  |
| 928 | SE | CBWD2       | 2  | + | 114228609 | 114228666 | 0.000496374 | -0.145 |

|     |    |         |    |   |           |           |             |        |
|-----|----|---------|----|---|-----------|-----------|-------------|--------|
| 929 | SE | IST1    | 16 | + | 71957993  | 71958184  | 0.001712628 | -0.133 |
| 930 | SE | ZNF185  | X  | + | 152091263 | 152091353 | 2.34E-05    | -0.185 |
| 931 | SE | ENDOV   | 17 | + | 78391580  | 78391745  | 0.002275451 | -0.271 |
| 932 | SE | ENDOV   | 17 | + | 78391610  | 78391745  | 0.02135709  | -0.162 |
| 933 | SE | EVI5L   | 19 | + | 7921977   | 7922010   | 0.001307055 | 0.102  |
| 934 | SE | CSPP1   | 8  | + | 68004037  | 68004118  | 0.001685298 | -0.128 |
| 935 | SE | ACIN1   | 14 | - | 23559190  | 23559310  | 1.01E-08    | 0.18   |
| 936 | SE | C1orf54 | 1  | + | 150252053 | 150252152 | 1.43E-05    | 0.254  |
| 937 | SE | ALG11   | 13 | + | 52593048  | 52593279  | 5.32E-07    | 0.139  |
| 938 | SE | ALG11   | 13 | + | 52598141  | 52599073  | 4.82E-08    | 0.108  |
| 939 | SE | ZNF707  | 8  | + | 144770163 | 144770237 | 2.89E-08    | -0.17  |
| 940 | SE | ZNF707  | 8  | + | 144773242 | 144773369 | 0.003970656 | -0.108 |
| 941 | SE | ZNF707  | 8  | + | 144773242 | 144773402 | 0.003367686 | -0.109 |
| 942 | SE | ZNF707  | 8  | + | 144774170 | 144774277 | 0.007006979 | -0.134 |
| 943 | SE | TEAD1   | 11 | + | 12696955  | 12697108  | 3.41E-06    | -0.12  |
| 944 | SE | STRADA  | 17 | - | 61803997  | 61804055  | 0.002708403 | -0.111 |
| 945 | SE | UGGT1   | 2  | + | 128913965 | 128913989 | 4.72E-07    | -0.188 |
| 946 | SE | IL10RA  | 11 | + | 117857321 | 117857528 | 2.90E-05    | -0.112 |
| 947 | SE | IL10RA  | 11 | + | 117857398 | 117857528 | 0.000305288 | -0.118 |
| 948 | SE | ANK1    | 8  | - | 41530033  | 41530430  | 1.03E-06    | 0.161  |
| 949 | SE | SH3YL1  | 2  | - | 224863    | 224920    | 0.000253759 | -0.165 |
| 950 | SE | CARS2   | 13 | - | 111296411 | 111296529 | 3.03E-09    | -0.106 |
| 951 | SE | PLD4    | 14 | + | 105394009 | 105394203 | 0.00298916  | 0.108  |
| 952 | SE | PLD4    | 14 | + | 105394015 | 105394203 | 0.008192213 | 0.186  |
| 953 | SE | UPK3A   | 22 | + | 45683052  | 45683332  | 4.27E-05    | 0.102  |
| 954 | SE | MICAL2  | 11 | + | 12270730  | 12270793  | 0.002922251 | -0.102 |
| 955 | SE | MICAL2  | 11 | + | 12277189  | 12277297  | 0.000218891 | -0.282 |
| 956 | SE | ECT2    | 3  | + | 172473272 | 172473365 | 0           | 0.509  |
| 957 | SE | PGAP2   | 11 | + | 3844842   | 3844970   | 0.007914803 | 0.207  |
| 958 | SE | BCAT2   | 19 | - | 49311012  | 49311493  | 0.003160737 | 0.191  |
| 959 | SE | FGFR1   | 8  | - | 38287199  | 38287466  | 0.001922198 | 0.243  |

|     |    |             |    |   |           |           |             |        |
|-----|----|-------------|----|---|-----------|-----------|-------------|--------|
| 960 | SE | PKD1        | 2  | + | 173427468 | 173427528 | 0.034506495 | -0.179 |
| 961 | SE | FAM166B     | 9  | - | 35563162  | 35563386  | 1.69E-07    | -0.241 |
| 962 | SE | CCDC18      | 1  | + | 93735903  | 93736371  | 0.023840858 | 0.111  |
| 963 | SE | EPB41L3     | 18 | - | 5400967   | 5401042   | 0.030636018 | 0.282  |
| 964 | SE | ZNRD1-AS1   | 6  | - | 30024867  | 30025494  | 0.03902823  | 0.108  |
| 965 | SE | MTAP        | 9  | + | 21808805  | 21808999  | 0.010370474 | -0.137 |
| 966 | SE | GNAI2       | 3  | + | 50289051  | 50289175  | 0.045850703 | -0.104 |
| 967 | SE | INPP1       | 2  | + | 191213613 | 191213757 | 0.008260295 | 0.15   |
| 968 | SE | DNAJC10     | 2  | + | 183604271 | 183604436 | 0.000171314 | -0.147 |
| 969 | SE | ADAM32      | 8  | + | 39068662  | 39068843  | 0.000417943 | -0.287 |
| 970 | SE | ZNF107      | 7  | + | 64129414  | 64129556  | 3.61E-06    | -0.322 |
| 971 | SE | RHBDD1      | 2  | + | 227704124 | 227704343 | 0.028348787 | 0.137  |
| 972 | SE | PRR5L       | 11 | + | 36402069  | 36402138  | 0.001563007 | -0.284 |
| 973 | SE | CYP1B1-AS1  | 2  | + | 38358061  | 38358332  | 0.001354654 | -0.291 |
| 974 | SE | TOMM20      | 1  | - | 235282653 | 235282721 | 0.008344582 | -0.171 |
| 975 | SE | ZYG11A      | 1  | + | 53322669  | 53323421  | 0.000583147 | -0.101 |
| 976 | SE | KCNAB2      | 1  | + | 6101890   | 6101932   | 0.000118515 | 0.103  |
| 977 | SE | SEMA3G      | 3  | - | 52474392  | 52474537  | 6.24E-07    | 0.214  |
| 978 | SE | DHRS13      | 17 | - | 27229600  | 27229719  | 0.001913038 | -0.134 |
| 979 | SE | ZDHHC16     | 10 | + | 99213555  | 99213603  | 0.000555218 | -0.126 |
| 980 | SE | ZDHHC16     | 10 | + | 99213555  | 99213603  | 4.08E-06    | -0.122 |
| 981 | SE | ST3GAL6-AS1 | 3  | - | 98434493  | 98434621  | 5.20E-06    | 0.351  |
| 982 | SE | BHLHB9      | X  | + | 102002744 | 102002839 | 0.009192774 | -0.189 |
| 983 | SE | TMEM161B-AS | 5  | + | 87577858  | 87577923  | 0.026839473 | 0.121  |
| 984 | SE | TMEM161B-AS | 5  | + | 87578573  | 87578683  | 0.000125905 | -0.12  |
| 985 | SE | P2RX5       | 17 | - | 3594249   | 3594321   | 0.006627192 | 0.223  |
| 986 | SE | ARL5A       | 2  | - | 152666891 | 152667075 | 0.000948464 | -0.247 |
| 987 | SE | EPB41L1     | 20 | + | 34797409  | 34797820  | 3.50E-11    | 0.467  |
| 988 | SE | CES4A       | 16 | + | 67040293  | 67040422  | 0.02392852  | -0.169 |
| 989 | SE | CES4A       | 16 | + | 67040293  | 67040422  | 2.73E-05    | -0.263 |
| 990 | SE | CES4A       | 16 | + | 67040647  | 67040720  | 0.02309855  | -0.221 |



|      |    |              |    |   |           |           |             |        |
|------|----|--------------|----|---|-----------|-----------|-------------|--------|
| 991  | SE | STAT2        | 12 | - | 56742707  | 56742843  | 0.018298344 | -0.124 |
| 992  | SE | TNPO3        | 7  | - | 128681610 | 128681771 | 0.017790731 | -0.166 |
| 993  | SE | CDKL3        | 5  | - | 133644264 | 133644418 | 0.008072914 | 0.202  |
| 994  | SE | CDKL3        | 5  | - | 133647982 | 133648071 | 1.19E-06    | -0.377 |
| 995  | SE | CDKL3        | 5  | - | 133655048 | 133655188 | 2.03E-08    | -0.198 |
| 996  | SE | STAG2        | X  | + | 123224703 | 123224814 | 0           | 0.122  |
| 997  | SE | C10orf128    | 10 | - | 50373249  | 50373328  | 0.039005647 | -0.283 |
| 998  | SE | ZMIZ2        | 7  | + | 44799749  | 44799827  | 2.25E-05    | -0.219 |
| 999  | SE | TTI1         | 20 | - | 36647406  | 36647546  | 0.000290186 | -0.244 |
| 1000 | SE | RP11-468E2.4 | 14 | + | 24633822  | 24634164  | 2.95E-09    | 0.117  |
| 1001 | SE | DZANK1       | 20 | - | 18433258  | 18433326  | 1.42E-06    | -0.257 |
| 1002 | SE | CYB5R3       | 22 | - | 43042646  | 43042707  | 0.022957867 | 0.103  |
| 1003 | SE | PTCHD3P1     | 10 | + | 29747202  | 29747449  | 0.031240838 | -0.146 |
| 1004 | SE | HP1BP3       | 1  | - | 21106842  | 21107033  | 2.65E-05    | -0.108 |
| 1005 | SE | RAD17        | 5  | + | 68667280  | 68667384  | 0.000307499 | 0.105  |
| 1006 | SE | ZNF37A       | 10 | + | 38383858  | 38384152  | 0.000545716 | -0.189 |
| 1007 | SE | ARFGEF2      | 20 | + | 47557735  | 47557766  | 0.008634594 | 0.12   |
| 1008 | SE | JUP          | 17 | - | 39929069  | 39929178  | 0.049389603 | 0.139  |
| 1009 | SE | DLST         | 14 | + | 75349293  | 75349327  | 0           | -0.324 |
| 1010 | SE | DLST         | 14 | + | 75349293  | 75349327  | 0           | -0.403 |
| 1011 | SE | DLST         | 14 | + | 75352288  | 75352337  | 0           | -0.114 |
| 1012 | SE | PTGES3L-AAR  | 17 | - | 41131566  | 41131790  | 0.000136794 | -0.125 |
| 1013 | SE | FLNB         | 3  | + | 58117653  | 58117746  | 1.14E-09    | -0.201 |
| 1014 | SE | FLNB         | 3  | + | 58127584  | 58127623  | 0.000152037 | 0.152  |
| 1015 | SE | FLNB         | 3  | + | 58127584  | 58127656  | 0.003990325 | 0.163  |
| 1016 | SE | COMMD4       | 15 | + | 75632042  | 75632219  | 0           | -0.104 |
| 1017 | SE | UBA3         | 3  | - | 69120685  | 69120768  | 0.04026989  | 0.227  |
| 1018 | SE | IQSEC2       | X  | - | 53308745  | 53308841  | 2.19E-06    | 0.214  |
| 1019 | SE | SEC63        | 6  | - | 108277168 | 108277310 | 0.004498111 | -0.231 |
| 1020 | SE | ANKMY1       | 2  | - | 241468453 | 241468926 | 0.002455109 | 0.148  |
| 1021 | SE | YARS         | 1  | - | 33263192  | 33263239  | 0.008641968 | 0.22   |

|      |    |               |    |   |           |           |             |        |
|------|----|---------------|----|---|-----------|-----------|-------------|--------|
| 1022 | SE | MFF           | 2  | + | 228211941 | 228212100 | 1.84E-05    | -0.123 |
| 1023 | SE | MFF           | 2  | + | 228217229 | 228217289 | 8.26E-08    | 0.102  |
| 1024 | SE | LTN1          | 21 | - | 30336898  | 30337088  | 0.037420477 | 0.17   |
| 1025 | SE | SHF           | 15 | - | 45464344  | 45464516  | 0.014841096 | 0.139  |
| 1026 | SE | DPEP2         | 16 | - | 68026412  | 68026539  | 9.22E-06    | 0.511  |
| 1027 | SE | DPEP2         | 16 | - | 68026412  | 68026539  | 9.20E-12    | 0.456  |
| 1028 | SE | PLAGL1        | 6  | - | 144306271 | 144306311 | 1.56E-06    | 0.125  |
| 1029 | SE | PLAGL1        | 6  | - | 144306271 | 144306333 | 7.87E-05    | 0.297  |
| 1030 | SE | SBF2-AS1      | 11 | + | 9801922   | 9802122   | 0.023352599 | -0.179 |
| 1031 | SE | CRLS1         | 20 | + | 6004025   | 6004068   | 0.016687436 | -0.215 |
| 1032 | SE | SFXN2         | 10 | + | 104476370 | 104476468 | 0.026803918 | -0.167 |
| 1033 | SE | S100A13       | 1  | - | 153602925 | 153603132 | 0.049090238 | -0.148 |
| 1034 | SE | SH3BP1        | 22 | + | 38051278  | 38051322  | 0.00482765  | -0.235 |
| 1035 | SE | URI1          | 19 | + | 30462099  | 30462134  | 2.59E-06    | 0.118  |
| 1036 | SE | CARD8         | 19 | - | 48735709  | 48735750  | 7.39E-09    | -0.144 |
| 1037 | SE | CARD8         | 19 | - | 48735709  | 48736046  | 1.98E-07    | -0.194 |
| 1038 | SE | CARD8         | 19 | - | 48752779  | 48752890  | 0.00010519  | -0.141 |
| 1039 | SE | FAF2          | 5  | + | 175880318 | 175880703 | 0.00949075  | -0.196 |
| 1040 | SE | FAM104A       | 17 | - | 71208816  | 71208879  | 0.031537238 | 0.125  |
| 1041 | SE | PRC1          | 15 | - | 91512308  | 91512350  | 2.63E-07    | -0.134 |
| 1042 | SE | PRC1          | 15 | - | 91512308  | 91512350  | 0.000265228 | -0.112 |
| 1043 | SE | PRC1          | 15 | - | 91512308  | 91512350  | 1.42E-06    | -0.169 |
| 1044 | SE | PRC1          | 15 | - | 91512308  | 91512350  | 0.020295017 | -0.132 |
| 1045 | SE | MATR3         | 5  | + | 138619219 | 138619290 | 0.018137499 | 0.28   |
| 1046 | SE | AC007551.3    | 7  | - | 35795342  | 35795427  | 0.037055937 | 0.19   |
| 1047 | SE | SIPA1L1       | 14 | + | 71867510  | 71867635  | 0.008374275 | -0.313 |
| 1048 | SE | SIPA1L1       | 14 | + | 71884846  | 71884913  | 0.005620631 | -0.118 |
| 1049 | SE | CTD-2313N18.5 | 11 | - | 71527955  | 71528142  | 0.004502606 | -0.417 |
| 1050 | SE | RP11-274B21.1 | 17 | + | 128218017 | 128218087 | 0           | 0.713  |
| 1051 | SE | SLC16A2       | X  | + | 73749047  | 73749276  | 6.48E-07    | -0.176 |
| 1052 | SE | YAF2          | 12 | - | 42629415  | 42629557  | 0.024124937 | 0.142  |

|      |    |               |    |   |           |           |             |        |
|------|----|---------------|----|---|-----------|-----------|-------------|--------|
| 1053 | SE | LETMD1        | 12 | + | 51445874  | 51445990  | 0.000380109 | 0.104  |
| 1054 | SE | LETMD1        | 12 | + | 51445874  | 51446029  | 0.000136995 | 0.121  |
| 1055 | SE | LETMD1        | 12 | + | 51447560  | 51447643  | 4.53E-10    | -0.128 |
| 1056 | SE | GNLY          | 2  | + | 85921875  | 85922119  | 0.000841077 | 0.252  |
| 1057 | SE | GNLY          | 2  | + | 85922038  | 85922119  | 0.000634504 | 0.263  |
| 1058 | SE | IL1RN         | 2  | + | 113879024 | 113879195 | 0.001362038 | 0.11   |
| 1059 | SE | MUM1          | 19 | + | 1366303   | 1366380   | 0.007364062 | -0.167 |
| 1060 | SE | RP11-216L13.1 | 9  | + | 139703706 | 139703881 | 8.55E-05    | 0.152  |
| 1061 | SE | ECHDC2        | 1  | - | 53372190  | 53372283  | 0.011839215 | -0.105 |
| 1062 | SE | ANAPC10       | 4  | - | 146018839 | 146018912 | 0.03887324  | 0.111  |
| 1063 | SE | GPATCH2L      | 14 | + | 76644550  | 76644665  | 0.015008057 | -0.221 |
| 1064 | SE | TNC           | 9  | - | 117808688 | 117808961 | 0.000994389 | -0.172 |
| 1065 | SE | TNC           | 9  | - | 117819431 | 117819704 | 9.67E-07    | -0.181 |
| 1066 | SE | CNIH2         | 11 | + | 66048887  | 66049045  | 7.83E-06    | -0.347 |
| 1067 | SE | FAM13A        | 4  | - | 89726161  | 89726203  | 1.83E-08    | -0.244 |
| 1068 | SE | ANKRD18B      | 9  | + | 33540075  | 33540210  | 0.01715104  | 0.286  |
| 1069 | SE | RP11-977G19.1 | 12 | - | 56704741  | 56704838  | 0.013686086 | 0.283  |
| 1070 | SE | DOK1          | 2  | + | 74783020  | 74783205  | 0.02308429  | -0.116 |
| 1071 | SE | LCP1          | 13 | - | 46768158  | 46768240  | 7.84E-07    | -0.319 |
| 1072 | SE | CUTC          | 10 | + | 101510125 | 101510153 | 1.57E-08    | -0.116 |
| 1073 | SE | PPP1R13B      | 14 | - | 104204030 | 104204197 | 0.000693625 | 0.108  |
| 1074 | SE | L3MBTL1       | 20 | + | 42159437  | 42159529  | 0.004686623 | -0.13  |
| 1075 | SE | RAPGEF2       | 4  | + | 160164925 | 160164943 | 1.17E-06    | -0.119 |
| 1076 | SE | RAPGEF2       | 4  | + | 160265187 | 160265211 | 0.008816679 | 0.132  |
| 1077 | SE | BTBD19        | 1  | + | 45275884  | 45275921  | 0.002482301 | -0.177 |
| 1078 | SE | ELMOD3        | 2  | + | 85582198  | 85582293  | 3.16E-06    | -0.162 |
| 1079 | SE | RP4-800G7.2   | 7  | + | 148986638 | 148986817 | 0.001404725 | -0.186 |
| 1080 | SE | ADARB1        | 21 | + | 46540708  | 46540874  | 0.021593508 | 0.215  |
| 1081 | SE | MPI           | 15 | + | 75189351  | 75189560  | 2.00E-09    | -0.107 |
| 1082 | SE | SH3BP5L       | 1  | - | 249114601 | 249115111 | 1.35E-05    | 0.152  |
| 1083 | SE | UNC5CL        | 6  | - | 41000622  | 41000885  | 0.01799028  | 0.201  |

|      |    |              |    |   |           |           |             |        |
|------|----|--------------|----|---|-----------|-----------|-------------|--------|
| 1084 | SE | RP1-197B17.3 | 12 | + | 48113382  | 48113482  | 3.42E-05    | -0.14  |
| 1085 | SE | IL6R         | 1  | + | 154417522 | 154417570 | 0.038003506 | 0.137  |
| 1086 | SE | ZNF142       | 2  | - | 219516423 | 219516545 | 9.82E-05    | -0.212 |
| 1087 | SE | ZNF142       | 2  | - | 219516423 | 219517023 | 0.000111884 | -0.216 |
| 1088 | SE | ZNF142       | 2  | - | 219523423 | 219523524 | 0.003837106 | -0.237 |
| 1089 | SE | ZNF142       | 2  | - | 219523423 | 219523524 | 1.56E-06    | -0.232 |
| 1090 | SE | ZNF142       | 2  | - | 219523423 | 219523599 | 2.26E-07    | -0.197 |
| 1091 | SE | ARFGAP2      | 11 | - | 47195309  | 47195391  | 0.000521382 | -0.183 |
| 1092 | SE | ARFGAP2      | 11 | - | 47195309  | 47195466  | 1.50E-06    | 0.217  |
| 1093 | SE | NAF1         | 4  | - | 164079376 | 164079479 | 0.003406295 | -0.159 |
| 1094 | SE | LRRFIP1      | 2  | + | 238667371 | 238667464 | 0.001906635 | 0.249  |
| 1095 | SE | GAS5         | 1  | - | 173833812 | 173833842 | 1.94E-06    | 0.102  |
| 1096 | SE | DUS2         | 16 | + | 68059283  | 68059397  | 0.014197894 | 0.115  |
| 1097 | SE | AC074286.1   | 2  | - | 178152212 | 178152562 | 0.000582703 | 0.103  |
| 1098 | SE | CPNE1        | 20 | - | 34246851  | 34246936  | 0.038682162 | 0.113  |
| 1099 | SE | GUSBP11      | 22 | - | 24032422  | 24032543  | 5.87E-05    | -0.129 |
| 1100 | SE | GUSBP11      | 22 | - | 24042912  | 24043032  | 2.08E-11    | 0.265  |
| 1101 | SE | GUSBP11      | 22 | - | 24042912  | 24043032  | 0           | 0.488  |
| 1102 | SE | TMEM126B     | 11 | + | 85342188  | 85342360  | 0.000234722 | -0.101 |
| 1103 | SE | COL2A1       | 12 | - | 48393701  | 48393908  | 1.81E-10    | 0.175  |
| 1104 | SE | CACNA2D4     | 12 | - | 1919708   | 1919753   | 0.003640826 | -0.137 |
| 1105 | SE | KB-1507C5.4  | 8  | + | 104004477 | 104004635 | 1.68E-07    | 0.294  |
| 1106 | SE | CAMLG        | 5  | + | 134079676 | 134079742 | 3.72E-10    | 0.108  |
| 1107 | SE | CHFR         | 12 | - | 133446204 | 133446420 | 0.045835568 | -0.114 |
| 1108 | SE | MACF1        | 1  | + | 39844132  | 39844195  | 0.003302957 | 0.116  |
| 1109 | SE | RNFT1        | 17 | - | 58037428  | 58037529  | 2.09E-06    | -0.193 |
| 1110 | SE | RNFT1        | 17 | - | 58039900  | 58039977  | 4.96E-09    | -0.181 |
| 1111 | SE | COPS7A       | 12 | + | 6834813   | 6834923   | 5.15E-06    | 0.218  |
| 1112 | SE | ZNF655       | 7  | + | 99159510  | 99159596  | 3.65E-06    | -0.127 |
| 1113 | SE | ZNF655       | 7  | + | 99159510  | 99159596  | 0.001260472 | -0.148 |
| 1114 | SE | ZNF655       | 7  | + | 99159510  | 99159596  | 2.80E-07    | -0.206 |

|      |    |              |    |   |           |           |             |        |
|------|----|--------------|----|---|-----------|-----------|-------------|--------|
| 1115 | SE | ZNF655       | 7  | + | 99159510  | 99159596  | 7.39E-07    | -0.184 |
| 1116 | SE | ZNF655       | 7  | + | 99159971  | 99160117  | 2.09E-06    | -0.149 |
| 1117 | SE | RBM6         | 3  | + | 50012755  | 50012825  | 0.000119376 | -0.109 |
| 1118 | SE | TERF1        | 8  | + | 73942570  | 73942630  | 0.017863791 | 0.108  |
| 1119 | SE | C9orf3       | 9  | + | 97844856  | 97845001  | 0.026516254 | -0.213 |
| 1120 | SE | CBWD1        | 9  | - | 151130    | 151175    | 0.001580859 | -0.13  |
| 1121 | SE | CBWD1        | 9  | - | 151304    | 151427    | 3.72E-08    | -0.132 |
| 1122 | SE | FAM78A       | 9  | - | 134139970 | 134140014 | 0.001236758 | 0.163  |
| 1123 | SE | INTS9        | 8  | - | 28719556  | 28719729  | 0.006626413 | 0.114  |
| 1124 | SE | FNBP1        | 9  | - | 132686122 | 132686275 | 1.04E-10    | 0.128  |
| 1125 | SE | GRHL1        | 2  | + | 10102583  | 10102660  | 0.000327475 | 0.418  |
| 1126 | SE | RTFDC1       | 20 | + | 55045655  | 55045807  | 0.007388813 | -0.209 |
| 1127 | SE | RTFDC1       | 20 | + | 55045655  | 55045997  | 0.000553279 | -0.24  |
| 1128 | SE | SEC31B       | 10 | - | 102256891 | 102257037 | 3.56E-05    | -0.147 |
| 1129 | SE | SEC31B       | 10 | - | 102276630 | 102276717 | 0.023957693 | -0.203 |
| 1130 | SE | NBPF11       | 1  | - | 146055344 | 146055447 | 0.031947386 | -0.189 |
| 1131 | SE | RPRD2        | 1  | + | 150414356 | 150414434 | 8.45E-06    | -0.123 |
| 1132 | SE | EVC          | 4  | + | 5825343   | 5825547   | 0.003653559 | 0.141  |
| 1133 | SE | RNH1         | 11 | - | 504823    | 504996    | 0.000180246 | 0.173  |
| 1134 | SE | RNH1         | 11 | - | 504823    | 504996    | 0.02196374  | 0.102  |
| 1135 | SE | RP11-10A14.4 | 8  | + | 9012475   | 9012586   | 0.000118515 | -0.211 |
| 1136 | SE | RP11-10A14.4 | 8  | + | 9012475   | 9012659   | 0.000240895 | -0.29  |
| 1137 | SE | GPR126       | 6  | + | 142704896 | 142704980 | 0.003640418 | -0.309 |
| 1138 | SE | ACPL2        | 3  | + | 140981084 | 140981182 | 0.014254113 | -0.402 |
| 1139 | SE | PLD3         | 19 | + | 40871459  | 40871492  | 0.042830288 | -0.169 |
| 1140 | SE | PLD3         | 19 | + | 40871459  | 40871492  | 4.29E-07    | -0.203 |
| 1141 | SE | PLD3         | 19 | + | 40871459  | 40871837  | 0           | -0.118 |
| 1142 | SE | PLD3         | 19 | + | 40871568  | 40871837  | 3.27E-13    | -0.155 |
| 1143 | SE | PLD3         | 19 | + | 40871624  | 40871837  | 0           | -0.142 |
| 1144 | SE | OCRL         | X  | + | 128718320 | 128718344 | 7.44E-05    | -0.104 |
| 1145 | SE | MYNN         | 3  | + | 169491818 | 169491885 | 1.96E-05    | 0.105  |

|      |    |              |    |   |           |           |             |        |
|------|----|--------------|----|---|-----------|-----------|-------------|--------|
| 1146 | SE | MYNN         | 3  | + | 169501517 | 169501646 | 0.000702055 | -0.176 |
| 1147 | SE | TRMT2B       | X  | - | 100296305 | 100296360 | 0.046880414 | -0.116 |
| 1148 | SE | TRMT2B       | X  | - | 100306239 | 100306355 | 0.000130217 | -0.348 |
| 1149 | SE | TRMT2B       | X  | - | 100306239 | 100306355 | 0.001607057 | 0.124  |
| 1150 | SE | VWDE         | 7  | - | 12414635  | 12414853  | 0.000969233 | 0.157  |
| 1151 | SE | PLSCR4       | 3  | - | 145918821 | 145918864 | 0.021645193 | -0.211 |
| 1152 | SE | CALM2        | 2  | - | 47399552  | 47399598  | 2.19E-05    | 0.172  |
| 1153 | SE | CALM2        | 2  | - | 47399552  | 47399598  | 0.027540729 | 0.136  |
| 1154 | SE | RP11-156P1.3 | 17 | - | 45131483  | 45131579  | 0.021088797 | 0.133  |
| 1155 | SE | APOPT1       | 14 | + | 104029551 | 104029716 | 0.007666489 | -0.289 |
| 1156 | SE | ZNF548       | 19 | + | 57902089  | 57902213  | 0.001959817 | -0.165 |
| 1157 | SE | ZNF548       | 19 | + | 57902089  | 57902213  | 7.08E-05    | -0.109 |
| 1158 | SE | ZNF548       | 19 | + | 57904168  | 57904316  | 0.000676099 | -0.161 |
| 1159 | SE | ZDHHC19      | 3  | - | 195925659 | 195925745 | 0.040332226 | -0.14  |
| 1160 | SE | TMEM241      | 18 | - | 20945597  | 20945632  | 0.004930426 | -0.239 |
| 1161 | SE | TMEM241      | 18 | - | 20950179  | 20950225  | 0.003338591 | -0.195 |
| 1162 | SE | TMEM241      | 18 | - | 20951385  | 20951434  | 1.55E-05    | -0.235 |
| 1163 | SE | TMEM241      | 18 | - | 21010594  | 21010641  | 0.00340458  | -0.108 |
| 1164 | SE | CCDC91       | 12 | + | 28351875  | 28351989  | 0.037370365 | 0.352  |
| 1165 | SE | AC137932.6   | 16 | + | 89390173  | 89390328  | 0.002229847 | -0.2   |
| 1166 | SE | POLL         | 10 | - | 103344634 | 103344676 | 0.036593179 | -0.177 |
| 1167 | SE | POLL         | 10 | - | 103344634 | 103344676 | 0.012235947 | -0.106 |
| 1168 | SE | PAPD7        | 5  | + | 6743824   | 6743953   | 1.05E-09    | -0.109 |
| 1169 | SE | ICA1         | 7  | - | 8267267   | 8267481   | 0           | 0.121  |
| 1170 | SE | SNRPN        | 15 | + | 25212175  | 25212299  | 0           | 0.283  |
| 1171 | SE | SNRPN        | 15 | + | 25212175  | 25212299  | 0           | 0.427  |
| 1172 | SE | SNRPN        | 15 | + | 25212175  | 25212387  | 0           | 0.155  |
| 1173 | SE | SNRPN        | 15 | + | 25212175  | 25212387  | 0           | 0.434  |
| 1174 | SE | ULK4         | 3  | - | 41978786  | 41978832  | 0.017709709 | -0.12  |
| 1175 | SE | ABLIM3       | 5  | + | 148622053 | 148622101 | 0.002337557 | 0.11   |
| 1176 | SE | GPR180       | 13 | + | 95271403  | 95271584  | 0.000147498 | -0.161 |

|      |    |              |    |   |           |           |             |        |
|------|----|--------------|----|---|-----------|-----------|-------------|--------|
| 1177 | SE | SCHIP1       | 3  | + | 159603995 | 159606732 | 0.049090238 | 0.263  |
| 1178 | SE | ZFX          | X  | + | 24169807  | 24169917  | 0.028250887 | -0.102 |
| 1179 | SE | ARHGEF6      | X  | - | 135760094 | 135760115 | 0           | -0.179 |
| 1180 | SE | RCOR3        | 1  | + | 211485696 | 211485829 | 0.000311241 | -0.131 |
| 1181 | SE | ZNF530       | 19 | + | 58117053  | 58119195  | 0.000994389 | 0.108  |
| 1182 | SE | RP4-665J23.1 | 1  | - | 91297486  | 91297753  | 1.99E-06    | -0.336 |
| 1183 | SE | PTPRJ        | 11 | + | 48171541  | 48171550  | 0           | -0.224 |
| 1184 | SE | NSL1         | 1  | - | 212939530 | 212939615 | 0.001350771 | 0.134  |
| 1185 | SE | PIWIL4       | 11 | + | 94337149  | 94337222  | 1.37E-05    | 0.234  |
| 1186 | SE | PIWIL4       | 11 | + | 94341350  | 94341852  | 0.007771067 | -0.151 |
| 1187 | SE | PLEKHA6      | 1  | - | 204197210 | 204197356 | 0.001144325 | -0.147 |
| 1188 | SE | PDE8A        | 15 | + | 85619092  | 85619149  | 0.034065955 | 0.101  |
| 1189 | SE | LDLRAD4      | 18 | + | 13484035  | 13484118  | 0.015069952 | 0.216  |
| 1190 | SE | MRPS28       | 8  | - | 80940929  | 80941031  | 0.04359678  | -0.149 |
| 1191 | SE | MRPS28       | 8  | - | 80940929  | 80941031  | 0.001809796 | -0.34  |
| 1192 | SE | MRPS28       | 8  | - | 80940929  | 80941031  | 0.000109205 | -0.12  |
| 1193 | SE | TRIM16       | 17 | - | 15554404  | 15555260  | 9.98E-07    | 0.268  |
| 1194 | SE | ALG8         | 11 | - | 77824931  | 77825035  | 0.005212399 | -0.136 |
| 1195 | SE | ALG8         | 11 | - | 77848287  | 77848691  | 0.039055898 | 0.135  |
| 1196 | SE | SAMD9L       | 7  | - | 92776195  | 92776459  | 0.032155479 | -0.232 |
| 1197 | SE | CTDP1        | 18 | + | 77496354  | 77496521  | 0.025528377 | -0.113 |
| 1198 | SE | GGA1         | 22 | + | 38009125  | 38009198  | 0.001163009 | 0.148  |
| 1199 | SE | FLVCR1       | 1  | + | 213061232 | 213061343 | 5.99E-08    | -0.223 |
| 1200 | SE | ZNF774       | 15 | + | 90898582  | 90898648  | 0.001296447 | -0.177 |
| 1201 | SE | PIKFYVE      | 2  | + | 209138744 | 209138777 | 0.005658178 | 0.116  |
| 1202 | SE | FAM45A       | 10 | + | 120864275 | 120864534 | 0.000581747 | -0.128 |
| 1203 | SE | RP11-250B2.3 | 6  | + | 81163826  | 81163944  | 0.004630814 | 0.172  |
| 1204 | SE | ITGA6        | 2  | + | 173366499 | 173366629 | 7.17E-09    | -0.18  |
| 1205 | SE | BRD9         | 5  | - | 868721    | 869234    | 2.95E-10    | -0.26  |
| 1206 | SE | BRD9         | 5  | - | 869359    | 869509    | 0           | 0.244  |
| 1207 | SE | BRD9         | 5  | - | 869359    | 869509    | 0.004472895 | 0.105  |

|      |    |             |    |   |           |           |             |        |
|------|----|-------------|----|---|-----------|-----------|-------------|--------|
| 1208 | SE | BRD9        | 5  | - | 869359    | 869519    | 0           | 0.359  |
| 1209 | SE | PHF21A      | 11 | - | 45967626  | 45967649  | 0.001198231 | 0.258  |
| 1210 | SE | RP11-134O21 | 8  | - | 2579023   | 2579126   | 0.044663848 | -0.118 |
| 1211 | SE | STAG1       | 3  | - | 136310286 | 136310391 | 0.013602932 | -0.111 |
| 1212 | SE | RP11-295G20 | 1  | - | 231660171 | 231660293 | 0.002139849 | -0.239 |
| 1213 | SE | ZSCAN32     | 16 | - | 3440422   | 3440517   | 0.027471103 | -0.142 |
| 1214 | SE | MCTP1       | 5  | - | 94253600  | 94253678  | 0.001267747 | 0.152  |
| 1215 | SE | MFSD12      | 19 | - | 3542773   | 3542975   | 0.002258251 | 0.146  |
| 1216 | SE | PRPF4B      | 6  | + | 4062790   | 4062867   | 1.37E-05    | -0.113 |
| 1217 | SE | PRPF4B      | 6  | + | 4062790   | 4062994   | 0.000194368 | -0.105 |
| 1218 | SE | CA5B        | X  | + | 15763753  | 15763833  | 0.000937513 | -0.452 |
| 1219 | SE | KDM8        | 16 | + | 27226196  | 27226329  | 0.025942225 | -0.173 |
| 1220 | SE | PCED1B-AS1  | 12 | - | 47600293  | 47600368  | 0.000448842 | -0.194 |
| 1221 | SE | PCED1B-AS1  | 12 | - | 47600293  | 47600371  | 0.000215894 | -0.179 |
| 1222 | SE | PCED1B-AS1  | 12 | - | 47603063  | 47603241  | 0.000721948 | -0.193 |
| 1223 | SE | PCED1B-AS1  | 12 | - | 47604422  | 47604540  | 0.010809222 | -0.29  |
| 1224 | SE | PCED1B-AS1  | 12 | - | 47604422  | 47604544  | 5.15E-05    | -0.188 |
| 1225 | SE | NAA16       | 13 | + | 41936866  | 41937009  | 7.40E-06    | 0.161  |
| 1226 | SE | CD320       | 19 | - | 8369914   | 8370689   | 0.001580859 | -0.131 |
| 1227 | SE | MMP24-AS1   | 20 | - | 33863958  | 33864117  | 0.014868231 | 0.353  |
| 1228 | SE | TMEM218     | 11 | - | 124972027 | 124972213 | 1.66E-05    | -0.285 |
| 1229 | SE | TMEM218     | 11 | - | 124972027 | 124972213 | 0.036249792 | -0.15  |
| 1230 | SE | TMEM218     | 11 | - | 124972027 | 124972247 | 0.026516254 | -0.151 |
| 1231 | SE | TMEM218     | 11 | - | 124980539 | 124980642 | 0.000105352 | -0.354 |
| 1232 | SE | GALNT10     | 5  | + | 153597588 | 153597709 | 0.00026735  | 0.116  |
| 1233 | SE | PFDN5       | 12 | + | 53689622  | 53689725  | 0           | -0.105 |
| 1234 | SE | PFDN5       | 12 | + | 53690027  | 53690059  | 0           | -0.125 |
| 1235 | SE | PFDN5       | 12 | + | 53690213  | 53690335  | 8.25E-05    | -0.209 |
| 1236 | SE | BTBD10      | 11 | - | 13466570  | 13466728  | 2.27E-06    | 0.116  |
| 1237 | SE | RREB1       | 6  | + | 7240670   | 7240835   | 0.002222981 | 0.118  |
| 1238 | SE | IFI27L1     | 14 | + | 94563837  | 94564024  | 0.013590203 | -0.169 |



|      |    |               |    |   |           |           |             |        |
|------|----|---------------|----|---|-----------|-----------|-------------|--------|
| 1239 | SE | IFI27L1       | 14 | + | 94563840  | 94564024  | 0.003806298 | -0.154 |
| 1240 | SE | TTC13         | 1  | - | 231079551 | 231079644 | 0.002484399 | 0.126  |
| 1241 | SE | TTC13         | 1  | - | 231081134 | 231081200 | 0.013082511 | -0.159 |
| 1242 | SE | CEBPZ-AS1     | 2  | + | 37425636  | 37425815  | 0.031748298 | 0.154  |
| 1243 | SE | LAS1L         | X  | - | 64744443  | 64744494  | 0.000123031 | -0.139 |
| 1244 | SE | ANKAR         | 2  | + | 190575774 | 190575879 | 0.005373427 | -0.383 |
| 1245 | SE | ANKAR         | 2  | + | 190602408 | 190602567 | 0.000594086 | -0.149 |
| 1246 | SE | MLLT10        | 10 | + | 21860903  | 21860955  | 0.042502101 | -0.197 |
| 1247 | SE | NUCB2         | 11 | + | 17308180  | 17308260  | 0.031409657 | 0.164  |
| 1248 | SE | PRSS36        | 16 | - | 31151999  | 31152078  | 0.01032122  | -0.154 |
| 1249 | SE | SGSM3         | 22 | + | 40797596  | 40797679  | 6.27E-06    | -0.112 |
| 1250 | SE | TLL5          | 14 | + | 76224173  | 76224212  | 0.00210004  | -0.116 |
| 1251 | SE | SLC9B2        | 4  | - | 103949903 | 103950040 | 0.001503183 | -0.153 |
| 1252 | SE | CLASP1        | 2  | - | 122160166 | 122160239 | 0.003589636 | -0.238 |
| 1253 | SE | ELAVL4        | 1  | + | 50663100  | 50663139  | 5.19E-07    | 0.32   |
| 1254 | SE | TCEB1         | 8  | - | 74881794  | 74881908  | 0.000340363 | 0.147  |
| 1255 | SE | GPBP1L1       | 1  | - | 46151247  | 46151292  | 9.11E-05    | -0.143 |
| 1256 | SE | CTD-2583A14.1 | 19 | + | 58331861  | 58331917  | 5.32E-05    | -0.131 |
| 1257 | SE | RBM4B         | 11 | - | 66433742  | 66433964  | 3.42E-09    | -0.161 |
| 1258 | SE | AKAP11        | 13 | + | 42887182  | 42887266  | 3.27E-13    | -0.15  |
| 1259 | SE | DDHD1         | 14 | - | 53518561  | 53518645  | 2.17E-07    | -0.2   |
| 1260 | SE | OGG1          | 3  | + | 9800917   | 9800970   | 0.003326289 | -0.262 |
| 1261 | SE | RPSAP58       | 19 | + | 23991520  | 23991616  | 0.000141017 | 0.131  |
| 1262 | SE | AC092295.7    | 19 | + | 37085057  | 37085201  | 0.019884768 | -0.117 |
| 1263 | SE | SPATA20       | 17 | + | 48625025  | 48625315  | 0.001922198 | 0.125  |
| 1264 | SE | PISD          | 22 | - | 32023988  | 32024196  | 0.001182643 | -0.223 |
| 1265 | SE | SEC31A        | 4  | - | 83752089  | 83752128  | 0.001804084 | -0.143 |
| 1266 | SE | ABI1          | 10 | - | 27047990  | 27048164  | 2.19E-10    | -0.186 |
| 1267 | SE | ABI1          | 10 | - | 27047990  | 27048167  | 6.33E-12    | -0.172 |
| 1268 | SE | VPS72         | 1  | - | 151145974 | 151146091 | 0.025684543 | 0.126  |
| 1269 | SE | ITPA          | 20 | + | 3193964   | 3194072   | 0.01732585  | -0.119 |

|      |    |              |    |   |           |           |             |        |
|------|----|--------------|----|---|-----------|-----------|-------------|--------|
| 1270 | SE | ITIH4        | 3  | - | 52848224  | 52848379  | 0.011754707 | 0.162  |
| 1271 | SE | RP11-367G6.3 | 6  | - | 25015985  | 25016063  | 7.83E-06    | -0.178 |
| 1272 | SE | SUGP2        | 19 | - | 19102148  | 19102362  | 3.73E-07    | -0.202 |
| 1273 | SE | XAF1         | 17 | + | 6662574   | 6662838   | 7.28E-05    | -0.105 |
| 1274 | SE | XAF1         | 17 | + | 6665204   | 6665356   | 3.01E-09    | -0.141 |
| 1275 | SE | SPNS3        | 17 | + | 4351449   | 4351598   | 0.016193882 | 0.124  |
| 1276 | SE | DIAPH1       | 5  | - | 140967790 | 140967817 | 8.92E-10    | -0.101 |
| 1277 | SE | DHX30        | 3  | + | 47860725  | 47860754  | 0.015319276 | -0.159 |
| 1278 | SE | ZNF226       | 19 | + | 44670857  | 44671035  | 0.008217318 | 0.183  |
| 1279 | SE | MDGA2        | 14 | - | 47342635  | 47342794  | 0.010746276 | 0.105  |
| 1280 | SE | MXRA8        | 1  | - | 1290829   | 1291132   | 3.73E-05    | -0.149 |
| 1281 | SE | LRIF1        | 1  | - | 111493909 | 111495437 | 6.73E-09    | 0.186  |
| 1282 | SE | SLC16A11     | 17 | - | 6945314   | 6946082   | 4.46E-06    | 0.175  |
| 1283 | SE | SLC16A6P1    | 17 | + | 62949794  | 62950611  | 0.003013545 | 0.102  |
| 1284 | SE | SYCP2L       | 6  | + | 10903107  | 10903196  | 1.94E-05    | -0.127 |
| 1285 | SE | SYCP2L       | 6  | + | 10907774  | 10907917  | 0.000275215 | -0.101 |
| 1286 | SE | WIBG         | 12 | - | 56308059  | 56308150  | 0.000366336 | -0.152 |
| 1287 | SE | CAPS2        | 12 | - | 75716753  | 75716867  | 0.00075857  | -0.341 |
| 1288 | SE | CAPS2        | 12 | - | 75784101  | 75784161  | 0.039569646 | -0.295 |
| 1289 | SE | LMF1         | 16 | - | 981641    | 981793    | 0.011701159 | -0.207 |
| 1290 | SE | BCAS4        | 20 | + | 49457073  | 49457467  | 0.03707021  | -0.219 |
| 1291 | SE | CALML4       | 15 | - | 68491878  | 68492019  | 0.02162864  | -0.131 |
| 1292 | SE | TFIP11       | 22 | - | 26907084  | 26907161  | 0.000497412 | 0.115  |
| 1293 | SE | RPRD1A       | 18 | - | 33620769  | 33620828  | 0.002083624 | 0.101  |
| 1294 | SE | SLC37A3      | 7  | - | 140045668 | 140045770 | 0.014666778 | -0.101 |
| 1295 | SE | LRRC6        | 8  | - | 133627283 | 133627343 | 0.000943286 | 0.123  |
| 1296 | SE | ZBED3-AS1    | 5  | + | 76394479  | 76394572  | 3.45E-06    | 0.382  |
| 1297 | SE | ZBED3-AS1    | 5  | + | 76394479  | 76394572  | 0.003195652 | -0.218 |
| 1298 | SE | HDAC2        | 6  | - | 114283530 | 114283558 | 2.89E-08    | -0.372 |
| 1299 | SE | FOXRED1      | 11 | + | 126144825 | 126144916 | 8.92E-05    | 0.126  |
| 1300 | SE | NDUFB8       | 10 | - | 102283733 | 102283896 | 0.001637188 | 0.164  |

|      |    |               |    |   |           |           |             |        |
|------|----|---------------|----|---|-----------|-----------|-------------|--------|
| 1301 | SE | RP1-130H16.18 | 22 | - | 30682251  | 30682365  | 0.012545835 | 0.114  |
| 1302 | SE | SLC6A9        | 1  | - | 44476397  | 44476554  | 0.027257513 | -0.119 |
| 1303 | SE | SLC6A9        | 1  | - | 44476480  | 44476554  | 0.001425711 | -0.189 |
| 1304 | SE | FAM228B       | 2  | + | 24384375  | 24384483  | 3.11E-05    | 0.226  |
| 1305 | SE | FAM228B       | 2  | + | 24384375  | 24384483  | 1.67E-05    | -0.171 |
| 1306 | SE | RP11-53O19.1  | 5  | - | 44785150  | 44785283  | 0.009244453 | -0.14  |
| 1307 | SE | ROBO3         | 11 | + | 124747832 | 124748027 | 0.019795123 | 0.187  |
| 1308 | SE | PHLPP2        | 16 | - | 71718378  | 71718504  | 0.005241829 | -0.121 |
| 1309 | SE | TMEM107       | 17 | - | 8079276   | 8079344   | 0.044989235 | -0.122 |
| 1310 | SE | FHIT          | 3  | - | 61151247  | 61151501  | 1.63E-05    | 0.299  |
| 1311 | SE | ARMCX4        | X  | + | 100779190 | 100779419 | 0.003709681 | -0.212 |
| 1312 | SE | HSF4          | 16 | + | 67201205  | 67201305  | 0.039823301 | 0.273  |
| 1313 | SE | AP2A2         | 11 | + | 1000431   | 1000598   | 0.001749422 | -0.119 |
| 1314 | SE | TSGA10        | 2  | - | 99770753  | 99770890  | 0.001468118 | -0.302 |
| 1315 | SE | SENP6         | 6  | + | 76350399  | 76350420  | 0.004733488 | -0.115 |
| 1316 | SE | SENP6         | 6  | + | 76350402  | 76350420  | 0.012589644 | -0.103 |
| 1317 | SE | FZD3          | 8  | + | 28357449  | 28357495  | 0.004498111 | -0.157 |
| 1318 | SE | RPS9          | 19 | + | 54710420  | 54710592  | 1.12E-06    | -0.124 |
| 1319 | SE | DCSTAMP       | 8  | + | 105352514 | 105352668 | 7.26E-06    | 0.132  |
| 1320 | SE | SLC6A6        | 3  | + | 14519973  | 14520076  | 0.010099193 | -0.17  |
| 1321 | SE | LST1          | 6  | + | 31555417  | 31555510  | 0.029941206 | -0.139 |
| 1322 | SE | LST1          | 6  | + | 31555417  | 31555510  | 5.18E-05    | -0.193 |
| 1323 | SE | LST1          | 6  | + | 31555720  | 31555743  | 0.036205017 | 0.123  |
| 1324 | SE | TNFSF12       | 17 | + | 7456903   | 7457142   | 0.031218757 | -0.14  |
| 1325 | SE | RAPGEF1       | 9  | - | 134480317 | 134480575 | 0.033756956 | 0.22   |
| 1326 | SE | SULT1A2       | 16 | - | 28604572  | 28604667  | 0.018649959 | 0.106  |
| 1327 | SE | PTPLA         | 10 | - | 17645558  | 17645647  | 0.036503044 | -0.207 |
| 1328 | SE | TLR10         | 4  | - | 38780591  | 38780672  | 2.30E-06    | 0.484  |
| 1329 | SE | TSC22D4       | 7  | - | 100061585 | 100061652 | 0.000729144 | -0.132 |
| 1330 | SE | SORBS1        | 10 | - | 97110965  | 97111133  | 2.44E-05    | -0.268 |
| 1331 | SE | SORBS1        | 10 | - | 97110972  | 97111133  | 0.000218963 | -0.259 |

|      |    |             |    |   |           |           |             |        |
|------|----|-------------|----|---|-----------|-----------|-------------|--------|
| 1332 | SE | NNMT        | 11 | + | 114167149 | 114167432 | 0.000115201 | -0.185 |
| 1333 | SE | ARPC4       | 3  | + | 9845219   | 9845391   | 0.001753253 | -0.134 |
| 1334 | SE | MASP1       | 3  | - | 187003612 | 187003865 | 0.000328811 | -0.125 |
| 1335 | SE | CIB2        | 15 | - | 78412909  | 78413003  | 0.001817102 | -0.246 |
| 1336 | SE | FAM81B      | 5  | + | 94782265  | 94782401  | 0.000198103 | -0.101 |
| 1337 | SE | PHF7        | 3  | + | 52456237  | 52456354  | 1.74E-07    | -0.337 |
| 1338 | SE | PHF7        | 3  | + | 52456237  | 52456354  | 0.014111396 | -0.111 |
| 1339 | SE | 2-Sep       | 2  | + | 242256913 | 242257014 | 0.000829094 | 0.107  |
| 1340 | SE | 2-Sep       | 2  | + | 242256913 | 242257014 | 0.04941368  | -0.176 |
| 1341 | SE | 2-Sep       | 2  | + | 242263823 | 242264077 | 0.010880245 | -0.17  |
| 1342 | SE | CATSPER2    | 15 | - | 43941924  | 43942077  | 0.001677046 | 0.113  |
| 1343 | SE | BACH1-IT1   | 21 | + | 30733351  | 30733564  | 3.38E-07    | -0.246 |
| 1344 | SE | SAP30L      | 5  | + | 153832015 | 153832055 | 3.56E-06    | -0.215 |
| 1345 | SE | SAP30L      | 5  | + | 153832015 | 153832059 | 4.10E-06    | -0.123 |
| 1346 | SE | COPZ2       | 17 | - | 46105041  | 46105155  | 2.78E-10    | -0.364 |
| 1347 | SE | SPAG4       | 20 | + | 34205441  | 34205762  | 2.98E-05    | 0.196  |
| 1348 | SE | SPAG4       | 20 | + | 34206371  | 34206642  | 9.67E-07    | 0.328  |
| 1349 | SE | PARP3       | 3  | + | 51976945  | 51977062  | 4.68E-08    | 0.351  |
| 1350 | SE | TYROBP      | 19 | - | 36398631  | 36398664  | 0           | -0.149 |
| 1351 | SE | HACL1       | 3  | - | 15628031  | 15628109  | 2.66E-05    | 0.337  |
| 1352 | SE | PCBD2       | 5  | + | 134296275 | 134296388 | 5.20E-05    | -0.228 |
| 1353 | SE | SELENBP1    | 1  | - | 151341479 | 151341665 | 2.04E-07    | -0.104 |
| 1354 | SE | PRCD        | 17 | + | 74539884  | 74540452  | 3.68E-06    | 0.208  |
| 1355 | SE | PRCD        | 17 | + | 74541611  | 74543454  | 1.15E-06    | -0.367 |
| 1356 | SE | PRCD        | 17 | + | 74541977  | 74542213  | 0.005522759 | -0.501 |
| 1357 | SE | LINC00664   | 19 | + | 21671112  | 21671258  | 0.001503183 | -0.124 |
| 1358 | SE | LINC00664   | 19 | + | 21671112  | 21671258  | 0.049970121 | -0.109 |
| 1359 | SE | PHF20L1     | 8  | + | 133811328 | 133811418 | 0           | 0.185  |
| 1360 | SE | PHF20L1     | 8  | + | 133811340 | 133811418 | 0           | 0.15   |
| 1361 | SE | KB-1572G7.2 | 22 | - | 24029017  | 24029182  | 1.44E-07    | 0.164  |
| 1362 | SE | LRRC27      | 10 | + | 134179802 | 134180181 | 0.036476856 | -0.129 |

|      |    |               |    |   |           |           |             |        |
|------|----|---------------|----|---|-----------|-----------|-------------|--------|
| 1363 | SE | CCDC14        | 3  | - | 123674892 | 123674962 | 2.00E-11    | -0.322 |
| 1364 | SE | CCDC14        | 3  | - | 123674892 | 123674962 | 0.000226383 | -0.277 |
| 1365 | SE | GSN           | 9  | + | 124044716 | 124044828 | 0           | -0.336 |
| 1366 | SE | GSN           | 9  | + | 124045596 | 124045670 | 0           | -0.176 |
| 1367 | SE | GSN           | 9  | + | 124062333 | 124062404 | 1.14E-12    | 0.391  |
| 1368 | SE | GSN           | 9  | + | 124062333 | 124062404 | 0           | 0.172  |
| 1369 | SE | GSN           | 9  | + | 124062333 | 124062404 | 0           | 0.33   |
| 1370 | SE | GSN           | 9  | + | 124062333 | 124062404 | 0           | 0.306  |
| 1371 | SE | GSN           | 9  | + | 124062333 | 124062404 | 0           | 0.366  |
| 1372 | SE | GSN           | 9  | + | 124062333 | 124062404 | 3.51E-10    | 0.127  |
| 1373 | SE | GSN           | 9  | + | 124062342 | 124062404 | 2.10E-12    | 0.392  |
| 1374 | SE | GSN           | 9  | + | 124062342 | 124062404 | 0           | 0.107  |
| 1375 | SE | CTBP2         | 10 | - | 126776759 | 126776888 | 3.27E-13    | 0.112  |
| 1376 | SE | CTBP2         | 10 | - | 126811225 | 126811437 | 0.006600654 | -0.212 |
| 1377 | SE | TMEM135       | 11 | + | 86782564  | 86782657  | 0.025303209 | -0.195 |
| 1378 | SE | AC005154.6    | 7  | - | 30590933  | 30591095  | 0.021856885 | -0.124 |
| 1379 | SE | AC005154.6    | 7  | - | 30591715  | 30591795  | 0.030750864 | -0.145 |
| 1380 | SE | TIE1          | 1  | + | 43773466  | 43773595  | 6.33E-11    | -0.118 |
| 1381 | SE | TUBGCP4       | 15 | + | 43695880  | 43696040  | 0.000587531 | -0.128 |
| 1382 | SE | SEC22C        | 3  | - | 42605256  | 42605372  | 2.47E-12    | -0.133 |
| 1383 | SE | SEC22C        | 3  | - | 42605256  | 42605472  | 0           | -0.181 |
| 1384 | SE | MROH7-TTC4    | 1  | + | 55174686  | 55174749  | 0.001962389 | -0.188 |
| 1385 | SE | RP11-130F10.1 | 4  | + | 178372628 | 178372744 | 0.005772496 | -0.148 |
| 1386 | SE | RP11-130F10.1 | 4  | + | 178514625 | 178514700 | 0.026933985 | 0.328  |
| 1387 | SE | RP11-130F10.1 | 4  | + | 178517614 | 178517685 | 1.37E-05    | -0.29  |
| 1388 | SE | FAM122C       | X  | + | 133981912 | 133982001 | 0.002760736 | -0.212 |
| 1389 | SE | SFXN4         | 10 | - | 120920566 | 120920593 | 0.002926176 | -0.117 |
| 1390 | SE | MS4A4A        | 11 | + | 60070031  | 60070190  | 7.79E-05    | -0.173 |
| 1391 | SE | KCNC4         | 1  | + | 110774842 | 110775219 | 0.006119413 | 0.178  |
| 1392 | SE | BBIP1         | 10 | - | 112667437 | 112667594 | 2.68E-07    | -0.126 |
| 1393 | SE | BBIP1         | 10 | - | 112677878 | 112677971 | 1.06E-09    | -0.114 |

|      |    |               |    |   |           |           |             |        |
|------|----|---------------|----|---|-----------|-----------|-------------|--------|
| 1394 | SE | EDEM2         | 20 | - | 33804550  | 33804674  | 0.000104126 | -0.207 |
| 1395 | SE | PIGB          | 15 | + | 55616977  | 55617032  | 0.004350477 | -0.162 |
| 1396 | SE | TMPO          | 12 | + | 98938007  | 98938127  | 0           | -0.105 |
| 1397 | SE | TMPO          | 12 | + | 98938728  | 98938839  | 0           | -0.111 |
| 1398 | SE | RP11-407N17.3 | 14 | + | 39790131  | 39790260  | 1.30E-09    | -0.15  |
| 1399 | SE | ANKRD36       | 2  | + | 97830133  | 97830206  | 0.013539872 | -0.228 |
| 1400 | SE | ITGB2-AS1     | 21 | + | 46347539  | 46347582  | 6.84E-07    | 0.135  |
| 1401 | SE | CDC42SE1      | 1  | - | 151029126 | 151029262 | 0.000537326 | -0.145 |
| 1402 | SE | CDC42SE1      | 1  | - | 151029131 | 151029262 | 0.000460799 | -0.145 |
| 1403 | SE | ZNF415        | 19 | - | 53618462  | 53618560  | 0.012580708 | -0.155 |
| 1404 | SE | DNAJC8        | 1  | - | 28526663  | 28526743  | 0.013663013 | -0.392 |
| 1405 | SE | RPL26         | 17 | - | 8285315   | 8285408   | 0.00046662  | 0.289  |
| 1406 | SE | ZNF429        | 19 | + | 21688786  | 21688882  | 0.015813637 | 0.218  |
| 1407 | SE | RP11-324I22.4 | 10 | - | 35624855  | 35624978  | 6.06E-06    | 0.359  |
| 1408 | SE | C14orf93      | 14 | - | 23470167  | 23470246  | 0.002578454 | 0.281  |
| 1409 | SE | C14orf93      | 14 | - | 23474273  | 23474339  | 0.000728588 | -0.234 |
| 1410 | SE | TM7SF3        | 12 | - | 27136425  | 27136529  | 7.11E-05    | -0.262 |
| 1411 | SE | AP1S2         | X  | - | 15851566  | 15851647  | 0.000127443 | -0.191 |
| 1412 | SE | MICAL3        | 22 | - | 18305712  | 18305826  | 0.000211638 | -0.207 |
| 1413 | SE | ZNF140        | 12 | + | 133657858 | 133657915 | 0.013631626 | -0.108 |
| 1414 | SE | HKR1          | 19 | + | 37837324  | 37837394  | 0.006492428 | -0.132 |
| 1415 | SE | ATP11C        | X  | - | 138813809 | 138813914 | 0.001135356 | -0.131 |
| 1416 | SE | MLLT3         | 9  | - | 20380204  | 20380325  | 0.016755568 | -0.126 |
| 1417 | SE | MRPL33        | 2  | + | 27997290  | 27997397  | 3.54E-12    | -0.106 |
| 1418 | SE | MRPL33        | 2  | + | 28005438  | 28005561  | 0.002708403 | -0.31  |
| 1419 | SE | FOXRED2       | 22 | - | 36900144  | 36900414  | 1.76E-06    | -0.15  |
| 1420 | SE | YPEL4         | 11 | - | 57414945  | 57415159  | 3.78E-05    | 0.219  |
| 1421 | SE | ATP8A1        | 4  | - | 42596305  | 42596379  | 1.98E-07    | -0.231 |
| 1422 | SE | GABRE         | X  | - | 151127435 | 151127621 | 2.37E-07    | -0.129 |
| 1423 | SE | APP           | 21 | - | 27369674  | 27369731  | 0.000462879 | 0.124  |
| 1424 | SE | PRR4          | 12 | - | 11035150  | 11035297  | 0.001445591 | 0.148  |

|      |    |               |    |   |           |           |             |        |
|------|----|---------------|----|---|-----------|-----------|-------------|--------|
| 1425 | SE | RP4-539M6.19  | 22 | + | 30811747  | 30811854  | 0.031506936 | 0.162  |
| 1426 | SE | STXBP5-AS1    | 6  | - | 147440552 | 147440613 | 0.020799846 | -0.166 |
| 1427 | SE | RTN2          | 19 | - | 45992603  | 45992811  | 0           | -0.157 |
| 1428 | SE | VEZT          | 12 | + | 95635939  | 95636090  | 0.016225907 | -0.31  |
| 1429 | SE | VEZT          | 12 | + | 95652020  | 95652058  | 0.002692291 | -0.107 |
| 1430 | SE | CEACAM1       | 19 | - | 43023099  | 43023387  | 3.98E-07    | -0.197 |
| 1431 | SE | FAM227B       | 15 | - | 49912330  | 49912387  | 0.000107704 | 0.108  |
| 1432 | SE | AC093388.3    | 2  | + | 191400606 | 191400713 | 0.008335988 | 0.101  |
| 1433 | SE | DPY19L1P1     | 7  | - | 32630490  | 32630616  | 2.16E-06    | -0.157 |
| 1434 | SE | DPY19L1P1     | 7  | - | 32632795  | 32632918  | 3.14E-06    | -0.18  |
| 1435 | SE | BCL2L12       | 19 | + | 50170275  | 50170418  | 0           | 0.101  |
| 1436 | SE | BCL2L12       | 19 | + | 50170278  | 50170418  | 0           | 0.148  |
| 1437 | SE | C8orf44       | 8  | + | 67592627  | 67592693  | 0.021856885 | -0.12  |
| 1438 | SE | ATF2          | 2  | - | 175939727 | 175939815 | 0.004105231 | -0.195 |
| 1439 | SE | UBP1          | 3  | - | 33450181  | 33450289  | 0.015425356 | -0.111 |
| 1440 | SE | IFT122        | 3  | + | 129210983 | 129211037 | 1.60E-11    | -0.162 |
| 1441 | SE | AMPD2         | 1  | + | 110163535 | 110163888 | 0.005225941 | 0.122  |
| 1442 | SE | AMPD2         | 1  | + | 110164806 | 110164975 | 0.005204981 | -0.183 |
| 1443 | SE | TRMT11        | 6  | + | 126327987 | 126328100 | 0.001332847 | -0.133 |
| 1444 | SE | C11orf54      | 11 | + | 93475128  | 93475260  | 0.000954376 | -0.126 |
| 1445 | SE | RP11-334C17.5 | 17 | - | 78178297  | 78178395  | 0.02567582  | -0.172 |
| 1446 | SE | RP11-334C17.5 | 17 | - | 78178297  | 78178416  | 0.020906244 | -0.119 |
| 1447 | SE | ZNF236        | 18 | + | 74667940  | 74668138  | 0.040667264 | -0.136 |
| 1448 | SE | CAST          | 5  | + | 96062497  | 96062563  | 0           | 0.117  |
| 1449 | SE | DPH5          | 1  | - | 101458192 | 101458296 | 0           | -0.131 |
| 1450 | SE | DPH5          | 1  | - | 101479265 | 101479374 | 0           | -0.103 |
| 1451 | SE | DPH5          | 1  | - | 101488490 | 101488885 | 0.010414267 | -0.215 |
| 1452 | SE | DPH5          | 1  | - | 101490864 | 101491022 | 0           | -0.143 |
| 1453 | SE | HMMR          | 5  | + | 162894709 | 162894754 | 0.008130363 | -0.103 |
| 1454 | SE | TBC1D32       | 6  | - | 121451014 | 121451070 | 0.010896228 | -0.182 |
| 1455 | SE | HNRNPA2B1     | 7  | - | 26230612  | 26230748  | 0           | -0.245 |

|      |    |           |    |   |           |           |             |        |
|------|----|-----------|----|---|-----------|-----------|-------------|--------|
| 1456 | SE | LINC00954 | 2  | + | 20070162  | 20070307  | 0.029343944 | -0.166 |
| 1457 | SE | ABCB7     | X  | - | 74334588  | 74334666  | 0.00534633  | 0.115  |
| 1458 | SE | ABCB7     | X  | - | 74334588  | 74334669  | 0.004831068 | 0.116  |
| 1459 | SE | CRYZ      | 1  | - | 75172786  | 75172888  | 0.001213321 | -0.111 |
| 1460 | SE | LRRC7     | 1  | + | 70509636  | 70509777  | 5.46E-08    | -0.227 |
| 1461 | SE | PHKA2     | X  | - | 18917290  | 18917344  | 1.59E-09    | -0.211 |
| 1462 | SE | PHKA2     | X  | - | 18918787  | 18918817  | 0.018692425 | -0.126 |
| 1463 | SE | TMEM14C   | 6  | + | 10724788  | 10724866  | 4.37E-12    | 0.139  |
| 1464 | SE | TMEM14C   | 6  | + | 10724788  | 10724866  | 0           | 0.331  |
| 1465 | SE | MAP3K15   | X  | - | 19432377  | 19432450  | 0.003032384 | -0.127 |
| 1466 | SE | ATP7B     | 13 | - | 52534283  | 52534458  | 0.000307499 | -0.14  |
| 1467 | SE | GLIPR2    | 9  | + | 36146108  | 36146212  | 0.006627192 | -0.134 |
| 1468 | SE | ARL15     | 5  | - | 53603717  | 53603776  | 0.002423799 | 0.221  |
| 1469 | SE | FBP1      | 9  | - | 97401422  | 97401616  | 0.010347693 | -0.203 |
| 1470 | SE | PDPR      | 16 | + | 70165204  | 70165322  | 0.004034357 | 0.118  |
| 1471 | SE | GORASP1   | 3  | - | 39142237  | 39142368  | 1.72E-06    | -0.167 |
| 1472 | SE | CCDC163P  | 1  | - | 45962975  | 45963055  | 0.000637278 | -0.179 |
| 1473 | SE | DDX59     | 1  | - | 200623568 | 200623678 | 0.000270906 | 0.33   |
| 1474 | SE | DDX59     | 1  | - | 200623568 | 200623710 | 0.000156316 | 0.307  |
| 1475 | SE | LONRF3    | X  | + | 118120887 | 118121043 | 0.01799028  | -0.173 |
| 1476 | SE | CD47      | 3  | - | 107774366 | 107774413 | 0.033747312 | -0.115 |
| 1477 | SE | CD47      | 3  | - | 107778298 | 107778391 | 5.54E-06    | -0.323 |
| 1478 | SE | CENPBD1P1 | 19 | + | 59097521  | 59097723  | 0.000157711 | 0.12   |
| 1479 | SE | CENPBD1P1 | 19 | + | 59102864  | 59102991  | 0.009486958 | 0.502  |
| 1480 | SE | AP3M2     | 8  | + | 42011995  | 42012054  | 0.000447552 | -0.117 |
| 1481 | SE | PRMT2     | 21 | + | 48081711  | 48081848  | 0.005533211 | -0.17  |
| 1482 | SE | PCNXL4    | 14 | + | 60574303  | 60575045  | 0.001232591 | -0.123 |
| 1483 | SE | ALAS2     | X  | - | 55050189  | 55050300  | 0.021909292 | 0.131  |
| 1484 | SE | RRBP1     | 20 | - | 17660643  | 17660720  | 0.049090238 | 0.11   |
| 1485 | SE | SEMA4B    | 15 | + | 90744689  | 90744967  | 0.035848454 | 0.187  |
| 1486 | SE | ARL1      | 12 | - | 101796919 | 101797033 | 0.000752303 | -0.407 |



|      |    |              |    |   |           |           |             |        |
|------|----|--------------|----|---|-----------|-----------|-------------|--------|
| 1487 | SE | NDUFA3       | 19 | + | 54608903  | 54609010  | 0.021773292 | -0.173 |
| 1488 | SE | MXRA7        | 17 | - | 74679928  | 74680009  | 0           | 0.112  |
| 1489 | SE | ISOC2        | 19 | - | 55967002  | 55967212  | 0.001280858 | -0.156 |
| 1490 | SE | ISOC2        | 19 | - | 55967002  | 55967212  | 0.037950781 | -0.121 |
| 1491 | SE | CPT1B        | 22 | - | 51012236  | 51012350  | 0.017088886 | -0.115 |
| 1492 | SE | RAD1         | 5  | - | 34913574  | 34913683  | 6.53E-07    | -0.113 |
| 1493 | SE | BIN1         | 2  | - | 127815048 | 127815177 | 0.008130363 | 0.188  |
| 1494 | SE | BIN1         | 2  | - | 127815048 | 127815177 | 4.14E-08    | 0.275  |
| 1495 | SE | PPIA         | 7  | + | 44838990  | 44839079  | 0.00866695  | 0.187  |
| 1496 | SE | RABGAP1L     | 1  | + | 174846529 | 174846743 | 3.73E-05    | 0.209  |
| 1497 | SE | MRPS6        | 21 | + | 35475133  | 35475207  | 0.045823298 | 0.169  |
| 1498 | SE | RP4-717123.3 | 1  | - | 93790191  | 93790286  | 0.007586789 | 0.136  |
| 1499 | SE | TVP23C-CDRT4 | 17 | - | 15343524  | 15343599  | 0.026097047 | -0.211 |
| 1500 | SE | TVP23C-CDRT4 | 17 | - | 15406411  | 15406546  | 0.009258806 | -0.115 |
| 1501 | SE | DNAJC4       | 11 | + | 63999981  | 64000086  | 0.012092442 | -0.122 |
| 1502 | SE | MTRF1        | 13 | - | 41835826  | 41835961  | 2.82E-06    | -0.112 |
| 1503 | SE | LY6G6C       | 6  | - | 31688729  | 31688840  | 0.028668389 | -0.304 |
| 1504 | SE | ANKS3        | 16 | - | 4776659   | 4776777   | 0.015606677 | -0.195 |
| 1505 | SE | ANKS3        | 16 | - | 4776659   | 4776781   | 0.00784673  | -0.16  |
| 1506 | SE | ANKS3        | 16 | - | 4776979   | 4777178   | 0.003186824 | -0.212 |
| 1507 | SE | EMR2         | 19 | - | 14877789  | 14877921  | 0.015019193 | 0.13   |
| 1508 | SE | SYNE1        | 6  | - | 152466621 | 152466690 | 0.021593508 | -0.18  |
| 1509 | SE | C2orf76      | 2  | - | 120097734 | 120097937 | 6.78E-06    | 0.311  |
| 1510 | SE | MAP7D2       | X  | - | 20068941  | 20069064  | 0.008015371 | -0.225 |
| 1511 | SE | CCDC150      | 2  | + | 197584897 | 197584958 | 0.017481118 | 0.139  |
| 1512 | SE | ATG4B        | 2  | + | 242592721 | 242592784 | 0           | -0.11  |
| 1513 | SE | NUMA1        | 11 | - | 71723446  | 71723488  | 0.022455593 | -0.213 |
| 1514 | SE | PROS1        | 3  | - | 93647545  | 93647641  | 0           | 0.38   |
| 1515 | SE | C4orf36      | 4  | - | 87811200  | 87811311  | 9.17E-07    | -0.32  |
| 1516 | SE | FAHD2B       | 2  | - | 97757599  | 97757725  | 0.048284853 | -0.114 |
| 1517 | SE | FAM200B      | 4  | + | 15686472  | 15686582  | 3.04E-11    | 0.23   |

|      |    |               |    |   |           |           |             |        |
|------|----|---------------|----|---|-----------|-----------|-------------|--------|
| 1518 | SE | FAM200B       | 4  | + | 15686472  | 15686582  | 2.34E-05    | 0.12   |
| 1519 | SE | FAM200B       | 4  | + | 15686508  | 15686582  | 6.53E-08    | 0.197  |
| 1520 | SE | RP11-267N12.3 | 1  | - | 163278333 | 163278421 | 0.003406295 | -0.155 |
| 1521 | SE | ZNF334        | 20 | - | 45140720  | 45140779  | 3.38E-07    | 0.151  |
| 1522 | SE | FDFT1         | 8  | + | 11660599  | 11660734  | 0.034600299 | -0.132 |
| 1523 | SE | SS18L1        | 20 | + | 60729336  | 60729521  | 0.012157555 | -0.111 |
| 1524 | SE | UQCC1         | 20 | - | 33934503  | 33934550  | 0.002604958 | -0.308 |
| 1525 | SE | ERVK13-1      | 16 | - | 2719411   | 2719562   | 0.00046662  | -0.299 |
| 1526 | SE | SLC30A6       | 2  | + | 32402545  | 32402665  | 0.008985877 | -0.115 |
| 1527 | SE | SLC30A6       | 2  | + | 32431954  | 32432002  | 0.040495149 | 0.233  |
| 1528 | SE | SULF2         | 20 | - | 46288142  | 46288196  | 5.02E-11    | -0.114 |
| 1529 | SE | RP11-321F6.1  | 15 | + | 66956699  | 66956790  | 3.55E-08    | -0.168 |
| 1530 | SE | RANBP17       | 5  | + | 170343468 | 170343588 | 0.003463172 | -0.146 |
| 1531 | SE | RANBP17       | 5  | + | 170343468 | 170343588 | 0.0002715   | -0.143 |
| 1532 | SE | CAMK2G        | 10 | - | 75585078  | 75585105  | 0.02196374  | -0.116 |
| 1533 | SE | TBC1D17       | 19 | + | 50382579  | 50382761  | 0           | -0.129 |
| 1534 | SE | PRDM5         | 4  | - | 121675707 | 121675793 | 0.004328496 | 0.189  |
| 1535 | SE | TTLL3         | 3  | + | 9859328   | 9859443   | 0.036138827 | -0.133 |
| 1536 | SE | TTLL3         | 3  | + | 9859328   | 9860604   | 7.83E-06    | -0.117 |
| 1537 | SE | TTLL3         | 3  | + | 9860238   | 9860604   | 2.81E-05    | -0.142 |
| 1538 | SE | TTLL3         | 3  | + | 9860238   | 9860604   | 0.012250566 | -0.112 |
| 1539 | SE | TTLL3         | 3  | + | 9860505   | 9860604   | 0.013876451 | -0.191 |
| 1540 | SE | HHLA2         | 3  | + | 108047116 | 108047194 | 1.58E-05    | 0.105  |
| 1541 | SE | ZNF417        | 19 | - | 58426932  | 58427033  | 0.005690376 | 0.219  |
| 1542 | SE | DSN1          | 20 | - | 35399275  | 35399380  | 5.50E-09    | -0.17  |
| 1543 | SE | DCUN1D2       | 13 | - | 114138154 | 114138511 | 0.001201782 | -0.11  |
| 1544 | SE | MPZL1         | 1  | + | 167745300 | 167745403 | 0.000142937 | 0.206  |
| 1545 | SE | TRA2A         | 7  | - | 23570799  | 23570889  | 4.42E-06    | 0.109  |
| 1546 | SE | CUL7          | 6  | - | 43015684  | 43015727  | 0.000291575 | -0.16  |
| 1547 | SE | COA1          | 7  | - | 43690210  | 43690311  | 2.06E-05    | -0.107 |
| 1548 | SE | COA1          | 7  | - | 43690210  | 43690311  | 0.045033161 | -0.106 |

|      |    |             |    |   |           |           |             |        |
|------|----|-------------|----|---|-----------|-----------|-------------|--------|
| 1549 | SE | MDM2        | 12 | + | 69208382  | 69208469  | 0.017184962 | 0.118  |
| 1550 | SE | MIR4435-1HG | 2  | - | 112108184 | 112108338 | 0.00085289  | 0.134  |
| 1551 | SE | EIF3H       | 8  | - | 117746515 | 117746563 | 7.04E-06    | 0.187  |
| 1552 | SE | TIAL1       | 10 | - | 121339982 | 121340050 | 0.003329446 | -0.171 |
| 1553 | SE | TIAL1       | 10 | - | 121339982 | 121340358 | 0.024380543 | -0.158 |
| 1554 | SE | RAD51AP1    | 12 | + | 4654947   | 4654998   | 0           | 0.134  |
| 1555 | SE | RAD51AP1    | 12 | + | 4654947   | 4654998   | 0.041529924 | 0.169  |
| 1556 | SE | RAD51AP1    | 12 | + | 4654947   | 4654998   | 4.33E-06    | 0.186  |
| 1557 | SE | NEDD1       | 12 | + | 97301381  | 97301634  | 0.001233812 | -0.13  |
| 1558 | SE | NUP50       | 22 | + | 45567689  | 45567918  | 0.048475432 | -0.121 |
| 1559 | SE | GAK         | 4  | - | 853149    | 853281    | 0.030890975 | -0.105 |
| 1560 | SE | RNF34       | 12 | + | 121842651 | 121842916 | 0           | 0.188  |
| 1561 | SE | SLC16A4     | 1  | - | 110925455 | 110925588 | 1.18E-05    | -0.184 |
| 1562 | SE | PLA2G6      | 22 | - | 38524275  | 38524437  | 0.023946673 | -0.112 |
| 1563 | SE | CCDC180     | 9  | + | 100090301 | 100090428 | 0.012407649 | 0.137  |
| 1564 | SE | N6AMT2      | 13 | - | 21311861  | 21311944  | 0.009531434 | 0.105  |
| 1565 | SE | CANT1       | 17 | - | 76996181  | 76996352  | 1.15E-05    | 0.204  |
| 1566 | SE | FRAS1       | 4  | + | 79387361  | 79387589  | 0.000193987 | -0.239 |
| 1567 | SE | ZNF225      | 19 | + | 44633194  | 44633251  | 9.81E-09    | 0.107  |
| 1568 | SE | CD44        | 11 | + | 35219667  | 35219793  | 0.009117821 | 0.155  |
| 1569 | SE | CD44        | 11 | + | 35223217  | 35223334  | 0.00026074  | 0.235  |
| 1570 | SE | CD44        | 11 | + | 35229651  | 35229753  | 0.023840858 | -0.128 |
| 1571 | SE | CD44        | 11 | + | 35229651  | 35229753  | 0.007849466 | -0.148 |
| 1572 | SE | CD44        | 11 | + | 35229651  | 35229753  | 4.64E-05    | -0.147 |
| 1573 | SE | CD44        | 11 | + | 35229651  | 35229756  | 0.011200231 | -0.262 |
| 1574 | SE | CD44        | 11 | + | 35229651  | 35229756  | 5.86E-05    | -0.159 |
| 1575 | SE | CD44        | 11 | + | 35232792  | 35232996  | 1.68E-11    | -0.113 |
| 1576 | SE | DONSON      | 21 | - | 34954470  | 34954552  | 5.79E-09    | -0.114 |
| 1577 | SE | DONSON      | 21 | - | 34955793  | 34955972  | 1.64E-08    | -0.127 |
| 1578 | SE | KIF21A      | 12 | - | 39724043  | 39724064  | 9.73E-12    | 0.286  |
| 1579 | SE | CNOT2       | 12 | + | 70691538  | 70691659  | 0.028166937 | -0.192 |

|      |    |            |    |   |           |           |             |        |
|------|----|------------|----|---|-----------|-----------|-------------|--------|
| 1580 | SE | FAM184A    | 6  | - | 119295592 | 119295739 | 1.73E-07    | -0.146 |
| 1581 | SE | HDLBP      | 2  | - | 242208615 | 242208710 | 0.046757941 | -0.111 |
| 1582 | SE | HDLBP      | 2  | - | 242208620 | 242208710 | 0.019954951 | -0.261 |
| 1583 | SE | GABARAPL1  | 12 | + | 10366434  | 10366573  | 0.000251124 | 0.168  |
| 1584 | SE | GABARAPL1  | 12 | + | 10366672  | 10366786  | 5.31E-05    | 0.182  |
| 1585 | SE | AD000671.6 | 19 | - | 36236025  | 36236113  | 0.010517713 | -0.123 |
| 1586 | SE | SNRPA1     | 15 | - | 101833497 | 101833598 | 2.02E-07    | -0.382 |
| 1587 | SE | RPS6KC1    | 1  | + | 213403839 | 213403887 | 0.001796101 | -0.134 |
| 1588 | SE | QTRTD1     | 3  | + | 113775845 | 113775953 | 4.79E-05    | 0.127  |
| 1589 | SE | MORN3      | 12 | - | 122090980 | 122091165 | 0.020266077 | 0.213  |
| 1590 | SE | PPM1M      | 3  | + | 52280989  | 52281244  | 0.002704461 | -0.159 |
| 1591 | SE | APBB2      | 4  | - | 40937093  | 40937156  | 2.20E-11    | 0.148  |
| 1592 | SE | DYSF       | 2  | + | 71776479  | 71776521  | 0.010158887 | -0.118 |
| 1593 | SE | SLC38A6    | 14 | + | 61519066  | 61519703  | 0.00436679  | -0.196 |
| 1594 | SE | MFSD6      | 2  | + | 191369721 | 191369847 | 0.000380646 | -0.241 |
| 1595 | SE | ACCSL      | 11 | + | 44074211  | 44074309  | 0.011839215 | -0.223 |
| 1596 | SE | NAP1L1     | 12 | - | 76467982  | 76468019  | 0.008005889 | -0.102 |
| 1597 | SE | AC092835.2 | 2  | + | 95877940  | 95878030  | 0.048309147 | -0.113 |
| 1598 | SE | HGD        | 3  | - | 120363165 | 120363290 | 6.89E-07    | 0.128  |
| 1599 | SE | TESPA1     | 12 | - | 55377777  | 55377950  | 7.47E-08    | 0.224  |
| 1600 | SE | PPIL3      | 2  | - | 201747064 | 201747105 | 2.35E-08    | -0.169 |
| 1601 | SE | PPIL3      | 2  | - | 201747064 | 201747158 | 1.27E-11    | -0.13  |
| 1602 | SE | ZNF682     | 19 | - | 20125983  | 20126075  | 0.001375266 | -0.202 |
| 1603 | SE | IDNK       | 9  | + | 86242921  | 86243126  | 0.014775767 | 0.25   |
| 1604 | SE | IDNK       | 9  | + | 86243095  | 86243126  | 0.000427396 | 0.205  |
| 1605 | SE | FGFR1OP    | 6  | + | 167426995 | 167427055 | 4.20E-09    | -0.161 |
| 1606 | SE | SAR1A      | 10 | - | 71922445  | 71922515  | 0.000710252 | -0.121 |
| 1607 | SE | RBBP7      | X  | - | 16870673  | 16870751  | 0.026264014 | -0.163 |
| 1608 | SE | TMEM191A   | 22 | + | 21057117  | 21057181  | 0.036222143 | -0.136 |
| 1609 | SE | LRP5       | 11 | + | 68213040  | 68213154  | 2.15E-06    | 0.138  |
| 1610 | SE | GTF2H2C    | 5  | + | 68863553  | 68863604  | 5.15E-09    | -0.234 |

|      |    |              |    |   |           |           |             |        |
|------|----|--------------|----|---|-----------|-----------|-------------|--------|
| 1611 | SE | PFN4         | 2  | - | 24345288  | 24345417  | 0.000104319 | 0.25   |
| 1612 | SE | APLP1        | 19 | + | 36368983  | 36369010  | 0.026604478 | -0.17  |
| 1613 | SE | APLP1        | 19 | + | 36368986  | 36369010  | 0.004421498 | -0.121 |
| 1614 | SE | C4orf21      | 4  | - | 113550914 | 113551171 | 0.000105619 | -0.447 |
| 1615 | SE | DENND5B      | 12 | - | 31652539  | 31652605  | 0.026066513 | -0.199 |
| 1616 | SE | CDR2         | 16 | - | 22433481  | 22433535  | 0.000821115 | -0.245 |
| 1617 | SE | ATP2A3       | 17 | - | 3831274   | 3831332   | 1.52E-07    | -0.186 |
| 1618 | SE | MBP          | 18 | - | 74809206  | 74809430  | 0.00053998  | -0.195 |
| 1619 | SE | RP11-640M9.2 | 1  | + | 144617149 | 144617252 | 0.035365    | -0.102 |
| 1620 | SE | ULK3         | 15 | - | 75134875  | 75135015  | 3.87E-10    | 0.138  |
| 1621 | SE | CD276        | 15 | + | 73989936  | 73990043  | 0.023922467 | -0.138 |
| 1622 | SE | DCUN1D4      | 4  | + | 52753288  | 52753410  | 1.37E-06    | -0.113 |
| 1623 | SE | COL6A3       | 2  | - | 238287278 | 238287878 | 0.000379235 | 0.138  |
| 1624 | SE | CCNL2        | 1  | - | 1328058   | 1328183   | 8.90E-07    | -0.159 |
| 1625 | SE | CCNL2        | 1  | - | 1328169   | 1328183   | 2.65E-05    | -0.116 |
| 1626 | SE | TNIP2        | 4  | - | 2746423   | 2746672   | 4.38E-05    | -0.118 |
| 1627 | SE | ABCC5        | 3  | - | 183703091 | 183703243 | 2.65E-07    | 0.11   |
| 1628 | SE | EPB41L2      | 6  | - | 131201283 | 131201346 | 0.000783218 | 0.153  |
| 1629 | SE | TMEM44       | 3  | - | 194337498 | 194337620 | 0.029718517 | -0.195 |
| 1630 | SE | GK5          | 3  | - | 141905035 | 141905109 | 0.001426812 | -0.205 |
| 1631 | SE | TMEM50B      | 21 | - | 34809189  | 34809299  | 0.018248265 | -0.109 |
| 1632 | SE | RP11-342M1.3 | 1  | - | 43310181  | 43310281  | 4.51E-06    | -0.15  |
| 1633 | SE | TRPV3        | 17 | - | 3424266   | 3424333   | 4.36E-06    | -0.178 |
| 1634 | SE | TRPV3        | 17 | - | 3427491   | 3427657   | 3.90E-06    | -0.307 |
| 1635 | SE | TRPV3        | 17 | - | 3430147   | 3430221   | 1.72E-05    | -0.147 |
| 1636 | SE | RGS10        | 10 | - | 121274894 | 121274967 | 1.71E-10    | 0.192  |
| 1637 | SE | GCKR         | 2  | + | 27722008  | 27722075  | 0.0182231   | -0.271 |
| 1638 | SE | SUMF2        | 7  | + | 56141806  | 56141911  | 0           | -0.166 |
| 1639 | SE | SUMF2        | 7  | + | 56146614  | 56146732  | 0.001125848 | -0.228 |
| 1640 | SE | RBPJ         | 4  | + | 26364067  | 26364250  | 0.000154248 | -0.105 |
| 1641 | SE | STAG3L2      | 7  | - | 74299833  | 74299941  | 0.010239796 | -0.157 |

|      |    |            |    |   |           |           |             |        |
|------|----|------------|----|---|-----------|-----------|-------------|--------|
| 1642 | SE | PACRGL     | 4  | + | 20703380  | 20703507  | 0.00351369  | 0.495  |
| 1643 | SE | PACRGL     | 4  | + | 20703763  | 20703844  | 2.11E-06    | 0.158  |
| 1644 | SE | PACRGL     | 4  | + | 20703763  | 20703844  | 0.007675015 | 0.17   |
| 1645 | SE | PACRGL     | 4  | + | 20709425  | 20709493  | 0.000130374 | -0.173 |
| 1646 | SE | PACRGL     | 4  | + | 20711305  | 20711396  | 0.017859214 | -0.119 |
| 1647 | SE | PACRGL     | 4  | + | 20714410  | 20714545  | 0.000101096 | -0.123 |
| 1648 | SE | RSBN1L-AS1 | 7  | - | 77290514  | 77290650  | 0.04430006  | -0.179 |
| 1649 | SE | RPS15A     | 16 | - | 18797561  | 18797658  | 9.94E-06    | 0.124  |
| 1650 | SE | CERS4      | 19 | + | 8279249   | 8279365   | 0.000164168 | -0.144 |
| 1651 | SE | MEGF6      | 1  | - | 3440687   | 3440810   | 0.003125984 | 0.15   |
| 1652 | SE | TTC7A      | 2  | + | 47144322  | 47144416  | 0.000598999 | -0.114 |
| 1653 | SE | ZNF138     | 7  | + | 64275953  | 64276031  | 0.000691805 | -0.139 |
| 1654 | SE | ZNF138     | 7  | + | 64275953  | 64276031  | 0.007311842 | -0.19  |
| 1655 | SE | ZNF287     | 17 | - | 16471356  | 16471431  | 0.045707813 | -0.107 |
| 1656 | SE | ZCWPW1     | 7  | - | 100014688 | 100014806 | 0.014857929 | -0.184 |
| 1657 | SE | CLDN12     | 7  | + | 90095723  | 90095827  | 0.000393558 | -0.119 |
| 1658 | SE | SREBF2     | 22 | + | 42274662  | 42274762  | 8.54E-09    | -0.127 |
| 1659 | SE | SREBF2     | 22 | + | 42296023  | 42296126  | 0.011782998 | -0.225 |
| 1660 | SE | IDE        | 10 | - | 94314637  | 94314674  | 8.17E-05    | 0.199  |
| 1661 | SE | ATP5L      | 11 | + | 118276371 | 118276424 | 0.027940211 | 0.12   |
| 1662 | SE | RCCD1      | 15 | + | 91499029  | 91499113  | 4.33E-05    | 0.203  |
| 1663 | SE | RCCD1      | 15 | + | 91499841  | 91500733  | 0.036712103 | -0.143 |
| 1664 | SE | NTRK1      | 1  | + | 156843424 | 156843751 | 0.00484259  | -0.125 |
| 1665 | SE | PPP3CB     | 10 | - | 75239607  | 75239726  | 0           | 0.204  |
| 1666 | SE | UBA2       | 19 | + | 34920997  | 34921091  | 0.010345661 | -0.158 |
| 1667 | SE | ROGDI      | 16 | - | 4851050   | 4851322   | 0.036390552 | 0.107  |
| 1668 | SE | HERC2P3    | 15 | - | 20688655  | 20688770  | 2.50E-05    | 0.151  |
| 1669 | SE | HLA-DPA1   | 6  | - | 33041247  | 33041549  | 5.10E-05    | -0.109 |
| 1670 | SE | NME6       | 3  | - | 48337608  | 48337726  | 0.003729503 | -0.243 |
| 1671 | SE | FDPS       | 1  | + | 155279543 | 155279756 | 3.01E-12    | -0.153 |
| 1672 | SE | FDPS       | 1  | + | 155279579 | 155279756 | 5.17E-12    | -0.167 |

|      |    |              |    |   |           |           |             |        |
|------|----|--------------|----|---|-----------|-----------|-------------|--------|
| 1673 | SE | SVOPL        | 7  | - | 138305790 | 138305880 | 0.027540729 | -0.164 |
| 1674 | SE | COASY        | 17 | + | 40714373  | 40714505  | 0           | 0.313  |
| 1675 | SE | AMMECR1L     | 2  | - | 128628387 | 128628502 | 3.72E-06    | -0.171 |
| 1676 | SE | AMMECR1L     | 2  | - | 128628822 | 128628933 | 3.72E-07    | -0.217 |
| 1677 | SE | MOK          | 14 | - | 102744942 | 102745031 | 0.001099818 | 0.374  |
| 1678 | SE | MEIS2        | 15 | - | 37390167  | 37390400  | 0.002919475 | -0.176 |
| 1679 | SE | CD33         | 19 | + | 51729564  | 51729612  | 4.13E-08    | -0.114 |
| 1680 | SE | CD33         | 19 | + | 51738411  | 51738508  | 0.015859282 | -0.246 |
| 1681 | SE | TSNARE1      | 8  | - | 143395744 | 143395801 | 0.001147341 | 0.132  |
| 1682 | SE | AGAP3        | 7  | + | 150835229 | 150835400 | 0.019825863 | 0.163  |
| 1683 | SE | TBC1D23      | 3  | + | 100030676 | 100030721 | 0.001428512 | -0.147 |
| 1684 | SE | FAM110B      | 8  | + | 59110389  | 59110716  | 0.000677512 | 0.195  |
| 1685 | SE | GMDS-AS1     | 6  | + | 2269931   | 2270033   | 4.41E-05    | -0.197 |
| 1686 | SE | NSRP1        | 17 | + | 28483557  | 28483680  | 1.33E-06    | 0.223  |
| 1687 | SE | SNCAIP       | 5  | + | 121788619 | 121788690 | 0.009192774 | -0.299 |
| 1688 | SE | TMEM39A      | 3  | - | 119154601 | 119154782 | 0.010697585 | -0.217 |
| 1689 | SE | TMEM39A      | 3  | - | 119171293 | 119171377 | 0.00686826  | -0.21  |
| 1690 | SE | STAU2        | 8  | - | 74621266  | 74621412  | 0           | 0.148  |
| 1691 | SE | NME4         | 16 | + | 448207    | 448385    | 3.87E-05    | 0.158  |
| 1692 | SE | SPATA13      | 13 | + | 24852751  | 24852959  | 0.000526316 | -0.124 |
| 1693 | SE | hsa-mir-6080 | 17 | - | 62746711  | 62746841  | 5.88E-05    | 0.108  |
| 1694 | SE | TAGLN        | 11 | + | 117070348 | 117070545 | 7.04E-10    | -0.204 |
| 1695 | SE | USP19        | 3  | - | 49154899  | 49155003  | 5.97E-05    | 0.24   |
| 1696 | SE | C1QTNF6      | 22 | - | 37591420  | 37591498  | 0.005053961 | -0.235 |
| 1697 | SE | C1QTNF6      | 22 | - | 37591420  | 37591552  | 0.002450137 | -0.159 |
| 1698 | SE | PCSK6        | 15 | - | 101871855 | 101871894 | 0.001195249 | -0.125 |
| 1699 | SE | PCSK6        | 15 | - | 101905203 | 101905249 | 0.003654317 | -0.107 |
| 1700 | SE | SMARCA1      | X  | - | 128627016 | 128627052 | 1.58E-10    | 0.266  |
| 1701 | SE | CCDC66       | 3  | + | 56594889  | 56595040  | 0.037070997 | -0.255 |
| 1702 | SE | SDR39U1      | 14 | - | 24911303  | 24911466  | 0.019438812 | -0.196 |
| 1703 | SE | SDR39U1      | 14 | - | 24911314  | 24911466  | 0.028166937 | -0.234 |

|      |    |               |    |   |           |           |             |        |
|------|----|---------------|----|---|-----------|-----------|-------------|--------|
| 1704 | SE | LRRC37B       | 17 | + | 30347715  | 30347822  | 0.009056812 | -0.116 |
| 1705 | SE | ASCC2         | 22 | - | 30230430  | 30230539  | 0.012250091 | 0.175  |
| 1706 | SE | ASCC2         | 22 | - | 30230477  | 30230539  | 0.022849749 | 0.235  |
| 1707 | SE | GAS8          | 16 | + | 90102040  | 90102095  | 0.007589921 | -0.19  |
| 1708 | SE | CD97          | 19 | + | 14507153  | 14507285  | 0.023067096 | -0.107 |
| 1709 | SE | TMEM9         | 1  | - | 201115867 | 201115997 | 0.001015038 | -0.313 |
| 1710 | SE | BZRAP1        | 17 | - | 56402894  | 56403074  | 0.037024282 | -0.324 |
| 1711 | SE | RP11-143J12.2 | 18 | - | 9132220   | 9132396   | 0.005993221 | -0.184 |
| 1712 | SE | RP11-143J12.2 | 18 | - | 9132220   | 9132407   | 0.007734195 | -0.189 |
| 1713 | SE | ZBTB8OS       | 1  | - | 33097427  | 33097480  | 0.037175814 | -0.329 |
| 1714 | SE | SMUG1         | 12 | - | 54581602  | 54581689  | 0.004463738 | -0.306 |
| 1715 | SE | SLC24A1       | 15 | + | 65944007  | 65944097  | 0.023501428 | 0.114  |
| 1716 | SE | NDUFB2        | 7  | + | 140400669 | 140400759 | 0.010554248 | 0.419  |
| 1717 | SE | TCTN1         | 12 | + | 111082771 | 111082948 | 0.040495149 | -0.173 |
| 1718 | SE | AC007246.3    | 2  | + | 39815588  | 39815707  | 0.003381538 | -0.326 |
| 1719 | SE | NPM2          | 8  | + | 21891619  | 21891786  | 0.020453631 | -0.113 |
| 1720 | SE | TEAD2         | 19 | - | 49859215  | 49859227  | 1.09E-07    | 0.158  |
| 1721 | SE | SPIN1         | 9  | + | 91030521  | 91030614  | 1.48E-06    | -0.174 |
| 1722 | SE | SPIN1         | 9  | + | 91031558  | 91031681  | 1.99E-06    | -0.228 |
| 1723 | SE | A1BG-AS1      | 19 | + | 58864686  | 58864840  | 0.01799028  | -0.219 |
| 1724 | SE | A1BG-AS1      | 19 | + | 58864744  | 58864840  | 0.014711436 | -0.186 |
| 1725 | SE | ALG13         | X  | + | 110932314 | 110932425 | 0.03237303  | 0.129  |
| 1726 | SE | SNHG17        | 20 | - | 37050738  | 37050888  | 0.024684496 | -0.119 |
| 1727 | SE | HDAC7         | 12 | - | 48186320  | 48186452  | 8.89E-10    | -0.155 |
| 1728 | SE | NR4A1         | 12 | + | 52446257  | 52446429  | 0.004100612 | 0.34   |
| 1729 | SE | NR4A1         | 12 | + | 52446279  | 52446429  | 0.036570125 | 0.306  |
| 1730 | SE | BAG6          | 6  | - | 31612083  | 31612191  | 3.54E-12    | 0.228  |
| 1731 | SE | TMEM248       | 7  | + | 66387135  | 66387233  | 6.34E-08    | 0.11   |
| 1732 | SE | P4HTM         | 3  | + | 49043209  | 49043300  | 0.012545835 | 0.224  |
| 1733 | SE | 6-Sep         | X  | - | 118752675 | 118752749 | 0.000216224 | 0.101  |
| 1734 | SE | MDM1          | 12 | - | 68710360  | 68710390  | 2.73E-10    | -0.253 |



|      |    |              |    |   |           |           |             |        |
|------|----|--------------|----|---|-----------|-----------|-------------|--------|
| 1735 | SE | PPRC1        | 10 | + | 103904776 | 103904847 | 2.39E-05    | 0.118  |
| 1736 | SE | RP11-51112.2 | 1  | - | 47851919  | 47852028  | 8.25E-05    | -0.188 |
| 1737 | SE | ASAP2        | 2  | + | 9531190   | 9531325   | 0.001359438 | 0.195  |
| 1738 | SE | TFDP1        | 13 | + | 114291934 | 114292211 | 0.000149101 | -0.119 |
| 1739 | SE | LPCAT1       | 5  | - | 1521461   | 1521595   | 0.002355172 | 0.213  |
| 1740 | SE | ZNF721       | 4  | - | 429558    | 429668    | 2.77E-08    | -0.176 |
| 1741 | SE | ZNF721       | 4  | - | 438131    | 438221    | 0.000137794 | -0.137 |
| 1742 | SE | RALGAPA2     | 20 | - | 20377338  | 20377378  | 2.97E-07    | -0.125 |
| 1743 | SE | CREM         | 10 | + | 35490378  | 35490414  | 0.04888827  | -0.173 |
| 1744 | SE | AGBL3        | 7  | + | 134674000 | 134674061 | 0.008458316 | -0.118 |
| 1745 | SE | AGBL3        | 7  | + | 134674000 | 134674061 | 2.73E-06    | -0.229 |
| 1746 | SE | AGBL3        | 7  | + | 134678243 | 134678429 | 0.001988404 | -0.13  |
| 1747 | SE | AGBL3        | 7  | + | 134678243 | 134678429 | 0.007666489 | -0.209 |
| 1748 | SE | RIF1         | 2  | + | 152359547 | 152359699 | 0.011836658 | -0.26  |
| 1749 | SE | SNAP25       | 20 | + | 10279915  | 10280060  | 0.021964617 | -0.273 |
| 1750 | SE | STAG3L5P     | 7  | + | 99943487  | 99943591  | 0.039805101 | -0.162 |
| 1751 | SE | MFSD2B       | 2  | + | 24240155  | 24240234  | 0.00070797  | 0.109  |
| 1752 | SE | MECP2        | X  | - | 153322391 | 153322705 | 7.08E-05    | -0.224 |
| 1753 | SE | AK2          | 1  | - | 33477048  | 33477311  | 0.000189058 | -0.187 |
| 1754 | SE | DZIP1L       | 3  | - | 137802954 | 137803095 | 0.000284852 | -0.183 |
| 1755 | SE | ABHD2        | 15 | + | 89633513  | 89633603  | 0.010237834 | 0.138  |
| 1756 | SE | ABHD2        | 15 | + | 89647412  | 89647501  | 0.000120515 | 0.15   |
| 1757 | SE | C14orf159    | 14 | + | 91611564  | 91611657  | 1.11E-08    | 0.12   |
| 1758 | SE | C14orf159    | 14 | + | 91611564  | 91611657  | 0.003828361 | 0.121  |
| 1759 | SE | C14orf159    | 14 | + | 91611564  | 91611657  | 0.028341203 | 0.171  |
| 1760 | SE | C14orf159    | 14 | + | 91614124  | 91614202  | 0.003302957 | 0.146  |
| 1761 | SE | NT5M         | 17 | + | 17207677  | 17207791  | 0.04515089  | 0.135  |
| 1762 | SE | ZSCAN9       | 6  | + | 28198113  | 28198266  | 0.026082911 | -0.138 |
| 1763 | SE | NR2C2        | 3  | + | 15001042  | 15001148  | 0.025842484 | -0.116 |
| 1764 | SE | NR2C2        | 3  | + | 15001042  | 15001148  | 0.00099524  | 0.104  |
| 1765 | SE | SAMHD1       | 20 | - | 35563743  | 35563806  | 5.26E-05    | 0.137  |

|      |    |          |    |   |           |           |             |        |
|------|----|----------|----|---|-----------|-----------|-------------|--------|
| 1766 | SE | TAF1D    | 11 | - | 93465409  | 93465457  | 0.00037116  | 0.323  |
| 1767 | SE | METTLL25 | 12 | + | 82763227  | 82763339  | 0.044560669 | 0.224  |
| 1768 | SE | CBWD5    | 9  | - | 70463030  | 70463075  | 0.007057975 | -0.309 |
| 1769 | SE | BDH1     | 3  | - | 197281432 | 197281584 | 0.006862552 | 0.216  |
| 1770 | SE | NDUFC1   | 4  | - | 140218538 | 140218597 | 0.001325096 | -0.467 |
| 1771 | SE | NDUFC1   | 4  | - | 140218538 | 140218597 | 0.023009336 | -0.101 |
| 1772 | SE | FYB      | 5  | - | 39212779  | 39213119  | 1.81E-08    | 0.149  |
| 1773 | SE | TANC2    | 17 | + | 61490040  | 61490070  | 7.59E-05    | 0.111  |
| 1774 | SE | TM2D1    | 1  | - | 62152463  | 62152593  | 0           | 0.11   |
| 1775 | SE | TM2D1    | 1  | - | 62189959  | 62190097  | 0.000587531 | -0.245 |
| 1776 | SE | TM2D1    | 1  | - | 62189959  | 62190097  | 0.037745825 | -0.255 |
| 1777 | SE | APLP2    | 11 | + | 129993506 | 129993674 | 0           | -0.204 |
| 1778 | SE | EVL      | 14 | + | 100540839 | 100540952 | 2.33E-06    | -0.492 |
| 1779 | SE | ANKRD23  | 2  | - | 97506523  | 97506649  | 1.81E-06    | 0.216  |
| 1780 | SE | ANKRD23  | 2  | - | 97506563  | 97506649  | 3.00E-07    | 0.297  |
| 1781 | SE | ACSL4    | X  | - | 108939372 | 108939425 | 0.043867096 | -0.256 |
| 1782 | SE | SRPK2    | 7  | - | 104766228 | 104766321 | 0           | 0.122  |
| 1783 | SE | SRPK2    | 7  | - | 104766694 | 104766787 | 4.87E-09    | -0.126 |
| 1784 | SE | OSBPL9   | 1  | + | 52221991  | 52222030  | 0           | -0.123 |
| 1785 | SE | THTPA    | 14 | + | 24025951  | 24026243  | 1.31E-05    | 0.22   |
| 1786 | SE | THTPA    | 14 | + | 24025951  | 24026248  | 8.48E-06    | 0.222  |
| 1787 | SE | THTPA    | 14 | + | 24025951  | 24026513  | 5.47E-06    | 0.186  |
| 1788 | SE | TMEM201  | 1  | + | 9670563   | 9670863   | 0.004199774 | -0.178 |
| 1789 | SE | TROVE2   | 1  | + | 193029003 | 193029352 | 0.001814393 | 0.222  |
| 1790 | SE | BTD      | 3  | + | 15643643  | 15643817  | 0.005658178 | 0.135  |
| 1791 | SE | ZNF691   | 1  | + | 43315235  | 43315413  | 0.011066491 | -0.16  |
| 1792 | SE | C1orf61  | 1  | - | 156387703 | 156387826 | 0.000457721 | -0.204 |
| 1793 | SE | IRF3     | 19 | - | 50167843  | 50167930  | 0.017885526 | 0.221  |
| 1794 | SE | MKL2     | 16 | + | 14242523  | 14242586  | 0.040764103 | 0.359  |
| 1795 | SE | AP1B1    | 22 | - | 29725700  | 29725709  | 0           | 0.171  |
| 1796 | SE | SLC2A9   | 4  | - | 9998404   | 9998565   | 0.012729546 | -0.147 |

|      |    |              |    |   |           |           |             |        |
|------|----|--------------|----|---|-----------|-----------|-------------|--------|
| 1797 | SE | KMT2E        | 7  | + | 104678831 | 104678972 | 0.004542926 | 0.205  |
| 1798 | SE | KMT2E        | 7  | + | 104679599 | 104679716 | 0.005212278 | -0.151 |
| 1799 | SE | C1orf35      | 1  | - | 228290599 | 228290750 | 0.00211413  | -0.125 |
| 1800 | SE | TANGO2       | 22 | + | 20040882  | 20041074  | 0.008112741 | 0.121  |
| 1801 | SE | NASP         | 1  | + | 46066056  | 46066129  | 1.22E-07    | 0.197  |
| 1802 | SE | LRR1         | 14 | + | 50074117  | 50074839  | 4.75E-05    | 0.11   |
| 1803 | SE | WDR27        | 6  | - | 170043792 | 170043882 | 0.000472414 | 0.3    |
| 1804 | SE | WDR27        | 6  | - | 170068077 | 170068281 | 0.010239796 | -0.239 |
| 1805 | SE | SUN1         | 7  | + | 889559    | 889670    | 0.002528331 | 0.143  |
| 1806 | SE | SUN1         | 7  | + | 889559    | 889670    | 5.45E-05    | -0.181 |
| 1807 | SE | SUN1         | 7  | + | 891020    | 891119    | 6.17E-06    | -0.107 |
| 1808 | SE | KIAA0226L    | 13 | - | 46952024  | 46952140  | 0.000739363 | 0.198  |
| 1809 | SE | C8orf44-SGK3 | 8  | + | 67602939  | 67602995  | 0.041720704 | -0.313 |
| 1810 | SE | OCEL1        | 19 | + | 17339611  | 17339724  | 0.035048757 | 0.109  |
| 1811 | SE | HARS2        | 5  | + | 140071379 | 140071602 | 0.014197894 | -0.129 |
| 1812 | SE | KCTD17       | 22 | + | 37456862  | 37456962  | 0.002036479 | -0.168 |
| 1813 | SE | KCTD17       | 22 | + | 37457143  | 37457215  | 0.000910952 | -0.13  |
| 1814 | SE | KCTD17       | 22 | + | 37457578  | 37457669  | 0.002825514 | -0.172 |
| 1815 | SE | CNTRL        | 9  | + | 123933685 | 123933826 | 0           | 0.152  |
| 1816 | SE | DNM1L        | 12 | + | 32891197  | 32891230  | 4.04E-05    | -0.147 |
| 1817 | SE | ANGPT2       | 8  | - | 6389852   | 6390008   | 3.89E-08    | -0.199 |
| 1818 | SE | MGAT5B       | 17 | + | 74900333  | 74900504  | 0.001074717 | -0.127 |
| 1819 | SE | PHYKPL       | 5  | - | 177651448 | 177651565 | 0.018735402 | -0.151 |
| 1820 | SE | CIRBP        | 19 | + | 1273599   | 1273714   | 0.00250226  | 0.106  |
| 1821 | SE | CEP63        | 3  | + | 134276983 | 134277189 | 0.048241384 | 0.113  |
| 1822 | SE | CDK16        | X  | + | 47081659  | 47081741  | 1.19E-05    | 0.2    |
| 1823 | SE | CDK16        | X  | + | 47081659  | 47081779  | 1.68E-10    | 0.332  |
| 1824 | SE | CDK16        | X  | + | 47081659  | 47081779  | 4.61E-08    | 0.218  |
| 1825 | SE | CDK16        | X  | + | 47081671  | 47081741  | 6.52E-09    | 0.309  |
| 1826 | SE | TOP3B        | 22 | - | 22325351  | 22325433  | 0.013686489 | -0.121 |
| 1827 | SE | ANGEL2       | 1  | - | 213184549 | 213184800 | 0.000164168 | -0.136 |

|      |    |         |    |   |          |          |             |       |
|------|----|---------|----|---|----------|----------|-------------|-------|
| 1828 | SE | ZNF532  | 18 | + | 56621465 | 56621566 | 1.32E-08    | 0.205 |
| 1829 | SE | EXOC3L1 | 16 | - | 67223533 | 67223586 | 0.006638755 | 0.172 |

**Supplemental Table 4. Tier-based classification of events and qualitative levels of evidence.**

**Supplemental Table 4**

| Tier | Qualitative levels of evidence                                                                               |
|------|--------------------------------------------------------------------------------------------------------------|
| 1    | DTU $\cap$ top ranked in splicing $\cap$ gene shows statistically significant expression change              |
| 2    | DTU $\cap$ top ranked in splicing<br>or<br>DTU $\cap$ gene shows statistically significant expression change |
| 3    | DTU<br>or<br>top ranked in splicing $\cap$ gene shows statistically significant expression change            |
| 4    | top ranked in splicing<br>or<br>gene shows statistically significant expression change                       |
| 5    | any other differential splicing event                                                                        |

**Supplemental Table 5. Mutant SF3B1 splicing signature.**

**Supplemental Table 5**

|    | Event Type | Gene     | Chromosome | Strand | Starting position | Ending Position | FDR      | Inclusion level difference | Label     | In_Pellagatti_et_al.                            | Biotype of upregulated transcript | Biotype of downregulated transcript | Expression            | Expression_log2fc |
|----|------------|----------|------------|--------|-------------------|-----------------|----------|----------------------------|-----------|-------------------------------------------------|-----------------------------------|-------------------------------------|-----------------------|-------------------|
| 1  | A3SS       | ABCB7    | X          | -      | 74291343          | 74291539        | 0        | 0.127                      | ABCB7     | present but not significant                     | processed transcript              | no downregulated transcript         | down stat significant | >1                |
| 2  | A3SS       | ANKHD1   | 5          | +      | 139818045         | 139818202       | 0        | -0.524                     | ANKHD1    | present but not significant                     | protein coding                    | protein coding                      | down stat significant | <1                |
| 3  | A3SS       | ANKHD1   | 5          | +      | 139818078         | 139818202       | 0        | 0.458                      | ANKHD1-1  | present but not significant                     | protein coding                    | no downregulated transcript         | down stat significant | <1                |
| 4  | A3SS       | APBB3    | 5          | -      | 139941171         | 139941307       | 0        | 0.321                      | APBB3-2   | present but not significant                     | protein coding                    | no downregulated transcript         | down stat significant | >1                |
| 5  | A3SS       | ARIH1    | 15         | +      | 72862504          | 72862648        | 0        | 0.119                      | ARIH1     | present in SF3B1 mut vs SF-WT & SF3B1 mut vs WT | retained intron                   | no downregulated transcript         | down stat significant | <1                |
| 6  | A3SS       | BRD9     | 5          | -      | 869359            | 869519          | 0        | 0.442                      | BRD9      | present but not significant                     | nonsense mediated decay           | no downregulated transcript         | down stat significant | <1                |
| 7  | A3SS       | CRNDE    | 16         | -      | 54954209          | 54954322        | 0        | -0.651                     | CRNDE     | present but not significant                     | lincRNA                           | lincRNA                             | up stat significant   | <1                |
| 8  | A3SS       | CRNDE    | 16         | -      | 54954209          | 54954322        | 0        | -0.372                     | CRNDE-1   | present but not significant                     | lincRNA                           | lincRNA                             | up stat significant   | <1                |
| 9  | A3SS       | DLST     | 14         | +      | 75356580          | 75356655        | 0        | 0.389                      | DLST      | present in SF3B1 mut vs SF-WT & SF3B1 mut vs WT | nonsense mediated decay           | no downregulated transcript         | down stat significant | <1                |
| 10 | A3SS       | ERCC3    | 2          | -      | 128046912         | 128047095       | 0        | 0.147                      | ERCC3-1   | present only in SF3B1 mut vs SF-WT              | protein coding                    | no downregulated transcript         | up stat significant   | <1                |
| 11 | A3SS       | FOXRED1  | 11         | +      | 126143210         | 126143349       | 0        | 0.114                      | FOXRED1   | present in SF3B1 mut vs SF-WT & SF3B1 mut vs WT | retained intron                   | no downregulated transcript         | down stat significant | <1                |
| 12 | A3SS       | GAS8     | 16         | +      | 90097583          | 90097904        | 0        | 0.461                      | GAS8      | present but not significant                     | nonsense mediated decay           | no downregulated transcript         | down stat significant | <1                |
| 13 | A3SS       | GUCY1B3  | 4          | +      | 156723364         | 156723731       | 0        | 0.109                      | GUCY1B3   | present in SF3B1 mut vs SF-WT & SF3B1 mut vs WT | no upregulated transcript         | protein coding                      | up stat significant   | <1                |
| 14 | A3SS       | HLTF     | 3          | -      | 148759276         | 148759467       | 0        | 0.246                      | HLTF      | present in SF3B1 mut vs SF-WT & SF3B1 mut vs WT | protein coding                    | no downregulated transcript         | up stat significant   | <1                |
| 15 | A3SS       | KIAA1033 | 12         | +      | 105514866         | 105514982       | 0        | 0.28                       | KIAA1033  | present but not significant                     | nonsense mediated decay           | protein coding                      | down stat significant | <1                |
| 16 | A3SS       | METTL5   | 2          | -      | 170668966         | 170669034       | 0        | 0.141                      | METTL5    | present in SF3B1 mut vs SF-WT & SF3B1 mut vs WT | protein coding                    | protein coding                      | up stat significant   | <1                |
| 17 | A3SS       | PSTPIP1  | 15         | +      | 77328142          | 77328276        | 0        | -0.217                     | PSTPIP1   | present in SF3B1 mut vs SF-WT & SF3B1 mut vs WT | protein coding                    | protein coding                      | down stat significant | <1                |
| 18 | A3SS       | SHKBP1   | 19         | +      | 41084353          | 41084448        | 0        | 0.108                      | SHKBP1    | present but not significant                     | nonsense mediated decay           | no downregulated transcript         | down stat significant | <1                |
| 19 | A3SS       | SNRPN    | 15         | +      | 25219434          | 25219603        | 0        | -0.296                     | SNRPN-5   | present in SF3B1 mut vs SF-WT & SF3B1 mut vs WT | protein coding                    | protein coding                      | up stat significant   | >1                |
| 20 | A3SS       | SNRPN    | 15         | +      | 25219457          | 25219603        | 0        | -0.145                     | SNRPN     | present in SF3B1 mut vs SF-WT & SF3B1 mut vs WT | protein coding                    | protein coding                      | up stat significant   | >1                |
| 21 | A3SS       | STAU2    | 8          | -      | 74621266          | 74621412        | 0        | 0.315                      | STAU2     | present in SF3B1 mut vs SF-WT & SF3B1 mut vs WT | processed transcript              | no downregulated transcript         | up stat significant   | <1                |
| 22 | A3SS       | TMEM214  | 2          | +      | 27260657          | 27260760        | 0        | -0.471                     | TMEM214   | present but not significant                     | protein coding                    | no downregulated transcript         | up stat significant   | <1                |
| 23 | A3SS       | TMEM218  | 11         | -      | 124972027         | 124972247       | 0        | 0.531                      | TMEM218   | present in SF3B1 mut vs SF-WT & SF3B1 mut vs WT | protein coding                    | no downregulated transcript         | down stat significant | <1                |
| 24 | A3SS       | TMEM218  | 11         | -      | 124972027         | 124972247       | 0        | 0.355                      | TMEM218-1 | present in SF3B1 mut vs SF-WT & SF3B1 mut vs WT | protein coding                    | no downregulated transcript         | down stat significant | <1                |
| 25 | A3SS       | ZNF410   | 14         | +      | 74360478          | 74360635        | 0        | 0.296                      | ZNF410    | present in SF3B1 mut vs SF-WT & SF3B1 mut vs WT | protein coding                    | no downregulated transcript         | up stat significant   | <1                |
| 26 | A5SS       | DSN1     | 20         | -      | 35399275          | 35399876        | 2.97E-12 | -0.111                     | DSN1      | present but not significant                     | protein coding                    | no downregulated transcript         | up stat significant   | <1                |
| 27 | A5SS       | SNRPN    | 15         | +      | 25212175          | 25212387        | 0        | -0.14                      | SNRPN-2   | present in SF3B1 mut vs SF-WT & SF3B1 mut vs WT | protein coding                    | no downregulated transcript         | up stat significant   | >1                |
| 28 | A5SS       | TMEM218  | 11         | -      | 124972532         | 124972705       | 4.60E-08 | -0.188                     | TMEM218-2 | present in SF3B1 mut vs SF-WT & SF3B1 mut vs WT | protein coding                    | no downregulated transcript         | down stat significant | <1                |
| 29 | MXE        | BRD9     | 5          | -      | 868721            | 869234          | 0        | 0.193                      | BRD9-4    | not present                                     | nonsense mediated decay           | no downregulated transcript         | down stat significant | <1                |
| 30 | MXE        | BRD9     | 5          | -      | 869359            | 869509          | 0        | -0.197                     | BRD9-2    | not present                                     | no upregulated transcript         | protein coding                      | down stat significant | <1                |
| 31 | MXE        | SNRPN    | 15         | +      | 25212175          | 25212299        | 0        | 0.192                      | SNRPN-3   | present in SF3B1 mut vs SF-WT & SF3B1 mut vs WT | protein coding                    | protein coding                      | up stat significant   | >1                |
| 32 | MXE        | SNRPN    | 15         | +      | 25212175          | 25212387        | 0        | 0.153                      | SNRPN-4   | not present                                     | protein coding                    | protein coding                      | up stat significant   | >1                |
| 33 | MXE        | TPM1     | 15         | +      | 63353396          | 63353472        | 0        | -0.101                     | TPM1      | present but not significant                     | protein coding                    | no downregulated transcript         | up stat significant   | >1                |
| 34 | RI         | AMT      | 3          | -      | 49454210          | 49455151        | 0        | -0.283                     | AMT       | present in SF3B1 mut vs SF-WT & SF3B1 mut vs WT | protein coding                    | no downregulated transcript         | down stat significant | <1                |
| 35 | RI         | AP5Z1    | 7          | +      | 4829462           | 4830222         | 1.41E-10 | -0.293                     | AP5Z1     | present but not significant                     | no upregulated transcript         | retained intron                     | down stat significant | <1                |
| 36 | RI         | APBB3    | 5          | -      | 139941171         | 139941434       | 0        | -0.655                     | APBB3     | present but not significant                     | protein coding                    | no downregulated transcript         | down stat significant | >1                |
| 37 | RI         | APBB3    | 5          | -      | 139941171         | 139941812       | 0        | -0.278                     | APBB3-1   | present but not significant                     | protein coding                    | no downregulated transcript         | down stat significant | >1                |
| 38 | RI         | ERCC3    | 2          | -      | 128046912         | 128047400       | 0        | -0.329                     | ERCC3     | present in SF3B1 mut vs SF-WT & SF3B1 mut vs WT | protein coding                    | no downregulated transcript         | up stat significant   | <1                |
| 39 | RI         | HERC2P9  | 15         | +      | 28881632          | 28882253        | 4.07E-10 | 0.401                      | HERC2P9   | present but not significant                     | retained intron                   | no downregulated transcript         | up stat significant   | <1                |
| 40 | RI         | MFSD10   | 4          | -      | 2934326           | 2934936         | 7.21E-13 | -0.115                     | MFSD10    | present but not significant                     | protein coding                    | no downregulated transcript         | down stat significant | <1                |
| 41 | RI         | OXA1L    | 14         | +      | 23239401          | 23239834        | 0        | 0.199                      | OXA1L     | present only in SF3B1 mut vs SF-WT              | retained intron                   | protein coding                      | down stat significant | <1                |



|    |    |            |    |   |           |           |          |        |            |                                                 |                           |                             |                       |    |
|----|----|------------|----|---|-----------|-----------|----------|--------|------------|-------------------------------------------------|---------------------------|-----------------------------|-----------------------|----|
| 42 | RI | RFNG       | 17 | - | 80007552  | 80007882  | 1.01E-13 | -0.171 | RFNG       | present but not significant                     | no upregulated transcript | retained intron             | down stat significant | <1 |
| 43 | RI | RPRD1A     | 18 | - | 33605560  | 33607038  | 0        | -0.822 | RPRD1A     | present in SF3B1 mut vs SF-WT & SF3B1 mut vs WT | protein coding            | protein coding              | up stat significant   | <1 |
| 44 | RI | TMEM218    | 11 | - | 124972027 | 124972705 | 0        | -0.444 | TMEM218-3  | present but not significant                     | protein coding            | no downregulated transcript | down stat significant | <1 |
| 45 | RI | TMEM218    | 11 | - | 124972027 | 124972705 | 0        | -0.312 | TMEM218-4  | present in SF3B1 mut vs SF-WT & SF3B1 mut vs WT | protein coding            | no downregulated transcript | down stat significant | <1 |
| 46 | SE | AC093415.2 | 3  | - | 37892914  | 37892983  | 1.22E-12 | 0.302  | AC093415.2 | present in SF3B1 mut vs SF-WT & SF3B1 mut vs WT | antisense                 | no downregulated transcript | up stat significant   | >1 |
| 47 | SE | BRD9       | 5  | - | 869359    | 869509    | 0        | 0.244  | BRD9-3     | present in SF3B1 mut vs SF-WT & SF3B1 mut vs WT | no upregulated transcript | protein coding              | down stat significant | <1 |
| 48 | SE | BRD9       | 5  | - | 869359    | 869519    | 0        | 0.359  | BRD9-1     | present in SF3B1 mut vs SF-WT & SF3B1 mut vs WT | nonsense mediated decay   | protein coding              | down stat significant | <1 |
| 49 | SE | DLST       | 14 | + | 75349293  | 75349327  | 0        | -0.324 | DLST-1     | present in SF3B1 mut vs SF-WT & SF3B1 mut vs WT | nonsense mediated decay   | no downregulated transcript | down stat significant | <1 |
| 50 | SE | DLST       | 14 | + | 75352288  | 75352337  | 0        | -0.114 | DLST-2     | present but not significant                     | nonsense mediated decay   | no downregulated transcript | down stat significant | <1 |
| 51 | SE | DPH5       | 1  | - | 101458192 | 101458296 | 0        | -0.131 | DPH5       | present in SF3B1 mut vs SF-WT & SF3B1 mut vs WT | processed transcript      | protein coding              | down stat significant | <1 |
| 52 | SE | DPH5       | 1  | - | 101490864 | 101491022 | 0        | -0.143 | DPH5-1     | present but not significant                     | no upregulated transcript | protein coding              | down stat significant | <1 |
| 53 | SE | PROS1      | 3  | - | 93647545  | 93647641  | 0        | 0.38   | PROS1      | present but not significant                     | protein coding            | no downregulated transcript | up stat significant   | <1 |
| 54 | SE | SNRPN      | 15 | + | 25212175  | 25212299  | 0        | 0.283  | SNRPN-1    | present in SF3B1 mut vs SF-WT & SF3B1 mut vs WT | protein coding            | protein coding              | up stat significant   | >1 |
| 55 | SE | SNRPN      | 15 | + | 25212175  | 25212387  | 0        | 0.155  | SNRPN-6    | present only in SF3B1 mut vs SF-WT              | protein coding            | protein coding              | up stat significant   | >1 |
| 56 | SE | STAU2      | 8  | - | 74621266  | 74621412  | 0        | 0.148  | STAU2-1    | present in SF3B1 mut vs SF-WT & SF3B1 mut vs WT | processed transcript      | no downregulated transcript | up stat significant   | <1 |
| 57 | SE | TMEM214    | 2  | + | 27260682  | 27260760  | 0        | 0.457  | TMEM214-2  | present in SF3B1 mut vs SF-WT & SF3B1 mut vs WT | protein coding            | no downregulated transcript | up stat significant   | <1 |
| 58 | SE | TPM1       | 15 | + | 63353396  | 63353472  | 0        | -0.167 | TPM1-1     | present but not significant                     | protein coding            | no downregulated transcript | up stat significant   | >1 |
| 59 | SE | TYROBP     | 19 | - | 36398631  | 36398664  | 0        | -0.149 | TYROBP     | present but not significant                     | protein coding            | no downregulated transcript | down stat significant | <1 |

## References

1. Kotini AG, Chang C-J, Boussaad I, et al. Functional analysis of a chromosomal deletion associated with myelodysplastic syndromes using isogenic human induced pluripotent stem cells. *Nat. Biotechnol.* 2015;33(6):646–655.
2. Papaemmanuil E, Gerstung M, Malcovati L, et al. Clinical and biological implications of driver mutations in myelodysplastic syndromes. *Blood.* 2013;122(22):3616–27; quiz 3699.
3. Bernard E, Nannya Y, Hasserjian RP, et al. Author Correction: Implications of TP53 allelic state for genome stability, clinical presentation and outcomes in myelodysplastic syndromes. *Nat. Med.* 2021;27(5):927.
4. Yu G, Wang L-G, Han Y, He Q-Y. clusterProfiler: an R Package for Comparing Biological Themes Among Gene Clusters. *OMICS: A Journal of Integrative Biology.* 2012;16(5):284–287.
5. Zhang Y, Liu T, Meyer CA, et al. Model-based analysis of ChIP-Seq (MACS). *Genome Biol.* 2008;9(9):R137.
6. Heinz S, Benner C, Spann N, et al. Simple combinations of lineage-determining transcription factors prime cis-regulatory elements required for macrophage and B cell identities. *Mol. Cell.* 2010;38(4):576–589.
7. Corces MR, Buenrostro JD, Wu B, et al. Lineage-specific and single-cell chromatin accessibility charts human hematopoiesis and leukemia evolution. *Nat. Genet.* 2016;48(10):1193–1203.
8. Troilo A, Benson EK, Esposito D, et al. Angiomotin stabilization by tankyrase inhibitors antagonizes constitutive TEAD-dependent transcription and proliferation of human tumor cells with Hippo pathway core component mutations. *Oncotarget.* 2016;7(20):28765–28782.
9. Teo SH, Tan M, Knight L, Yeo SH, Ng I. Pericentric inversion 9--incidence and clinical significance. *Ann. Acad. Med. Singapore.* 1995;24(2):302–304.
10. Lee S-G, Park TS, Lim G, et al. Constitutional pericentric inversion 9 and hematological disorders: a Korean tertiary institution's experience over eight years. *Ann. Clin. Lab. Sci.* 2010;40(3):273–277.
